# Supplementary material for: Coral restoration patents are disconnected from academic research and restoration practitioners
Source: Frontiers journal article supplement (doi:10.3389/fmars.2022.1093808), 2023-01-19
Supplement: Table_1.xlsx [file Table_1.xlsx]

## Sheet: Patents
#	Jurisdiction	Kind	Publication Number	Year	Application type	Keywords	Title	Affiliations	Country	Affiliation type	CPC Classifications	IPCR Classifications	Legal Status
1	CN	A	CN 107372210 A	2017	Ex situ aquaculture	Land-based nursery, coral breeding, structure, aquaculture	Apparatus for artificial indoor cultivation of coral	South China Sea Fisheries Res Institute;;Chinese Academy Of Fishery Sciences	China	Institution	A01K61/00;;Y02A40/81	A01K61/00	Pending
3	CN	A	CN 113243319 A	2021	Artificial reefs and structures	Artificial reef, substrate, coral transplanting, coral cultivation	Ecological restoration method and growth assisting system of coral reef	Jiangsu Lyuyan Ecological Tech Co Ltd	China	Corporation	A01K61/00;;A01K61/73;;A01K61/78;;Y02A10/26;;Y02A40/81	A01K61/00;;A01K61/73;;A01K61/78	Pending
4	WO	A2	WO 2007/123429 A2	2007	Artificial reefs and structures	Concrete substrate, Propagation, Nursery, Protocol	Method and device for coral propagation and establishment of coral nurseries	Alfeche Lemuel R;;pelaez Ernesto F;;yap Severo Eduardo M	Philippines	Private	A01K61/70;;Y02A10/26;;Y02A40/81	A01K61/02	Pending
5	CN	A	CN 109662047 A	2019	Ex situ aquaculture	aquaculture, lighting, land-based nursery	Device for accelerating growth of coral by improving light radiation condition	Univ Changsha Science & Tech	China	Institution	A01K61/00;;A01K63/06;;F21V3/06;;F21V5/04;;F21V7/22;;Y02A10/26;;Y02A40/81;;Y02P60/60	A01K61/00;;A01K63/06;;F21V3/06;;F21V5/04;;F21V7/22	Pending
6	CN	U	CN 212279453 U	2021	Artificial reefs and structures	structure, substrate, nursery, coral propagation, larvae settlement, coral culturing	Composite artificial coral reef and artificial coral reef ecological system	Shenzhen Institute Of Guangdong Ocean Univ;;univ Guangdong Ocean;;shenzhen Bihai Lantian Marine Tech Co Ltd	China	Institution	Y02A40/81	A01K61/73	Active
7	KR	A	KR 20130075822 A	2013	Materials, composites, and adhesives	Composite, adhesive material, coral transplnting and nursery	The adhering method of a coral insect for transplant and restoration and thereof appliance	In The Sea Korea Co Ltd	Korea	Corporation	A01K61/00;;C04B33/04;;C04B33/131;;C04B33/30;;C04B33/32;;E02B3/046;;Y02A40/81		Discontinued
8	CN	U	CN 209345821 U	2019	Artificial reefs and structures	Artificial reef, substrate	Prismoid-shaped coral proliferation reef base	Hainan Academy Of Ocean And Fisheries Sciences;;Hainan Ocean Development Planning And Design Res Inst	China	Institution	Y02A40/81	A01K61/00;;A01K61/70;;A01K61/73;;A01K61/78	Inactive
10	CN	A	CN 111592991 A	2020	Other	NA	Efficient calcium mineralizing bacterium and application thereof	Institute of Soil Science	China	Institution	C12N1/205;;C12R2001/085;;C04B41/00	C12N1/20;;C04B41/00;;C12R1/085	Pending
11	CN	U	CN 203279663 U	2013	Ex situ aquaculture	aquaculture, nursery aquarium for soft corals	Soft coral artificial expanding propagation device	Hainan Provincial Fisheries Res Inst	China	Institution		A01K63/00;;A01K63/04;;A01K63/06	Inactive
12	CN	U	CN 205071877 U	2016	Artificial reefs and structures	artificial reef, substrate	Artificial ecology coral reef	Univ Guangdong Ocean	China	Institution	Y02A40/81	A01K61/00	Inactive
13	CN	A	CN 106165659 A	2016	Ex situ aquaculture	Aquaculture, breeding method, clam	Artificial breeding method for tridacna	South China Sea Inst Oceanology	China	Institution	Y02A40/81	A01K61/00	Active
14	US	A1	US 2022/0111556 A1	2022	Other	artificial reef, substrate	Interlocking block molds	Donnelly William	US	Private	B28B7/0014;;B28B7/26;;B28B7/0014;;B28B7/26	B28B7/26;;B28B7/00	Pending
15	CN	U	CN 204120012 U	2015	Ex situ aquaculture	nursery, aquaculture, lighting system	Coral breeding light control device for controlling illumination angle of light	Hainan Academy Of Ocean And Fisheries Sciences	China	Institution		A01K63/04	Inactive
16	CN	U	CN 215123305 U	2021	Artificial reefs and structures	artificial reef, coral outplanting, coral cultivation	Artificial fish reef for coral transplantation	Univ Hainan Tropical Ocean	China	Institution		A01K61/00;;A01K61/73	Active
19	US	A1	US 2002/0119006 A1	2002	Artificial reefs and structures	artificial reef, substrate	Artificial reef module fro coral reef remediation	Moore Michael D.	US	Private	E02B3/046;;Y02A10/26	E02B3/04	Expired
20	US	A1	US 2015/0230434 A1	2015	Artificial reefs and structures	artificial reef, biodegradable substrate	Application of Green Technology Techniques to Construct a Biodegradable Artificial Reef	Manning Thomas	US	Private	A01K61/30;;A01K61/30;;A01K61/70;;A01K61/70;;Y02A40/81;;Y02A40/81	A01K61/00	Discontinued
21	CN	U	CN 213427787 U	2021	Restoration protocols and methods	Sargassum cultivation, coral bleaching prevention	Device for relieving coral whitening and repairing peat land	Univ Zhongkai Agri & Eng	China	Institution	Y02A40/81	A01K61/00;;C02F3/32;;C02F103/08	Active
22	CN	A	CN 105454101 A	2016	Artificial reefs and structures	Artificial reef, substrate, transplanting	Artificial ecological coral reef and construction method for same	Univ Guangdong Ocean	China	Institution	A01K61/00;;Y02A40/81	A01K61/73;;A01K61/77	Active
23	CN	A	CN 103583471 A	2014	Ex situ aquaculture	breeding method, soft coral	Method for artificial rapid propagation expanding of succulent soft coral	Hainan Provincial Fisheries Res Inst	China	Institution		A01K67/033	Active
26	CN	A	CN 107410757 A	2017	Ex situ aquaculture	Aquaculture, coral feeding, nursery	Preparation method of composite liquid bait for artificial breeding of coral	Univ Fujian	China	Institution		A23K50/80;;A23K10/14;;A23K10/18;;A23K10/22;;A23K10/26;;A23K20/158;;A23K20/174	Active
27	WO	A1	WO 2020/107576 A1	2020	Artificial reefs and structures	artificial reef, substrate	Artificial ecological reef of composite concrete material for ecological restoration of coral reefs	South China Sea Inst Oceanology	China	Institution	A01K61/70;;Y02A40/81	A01K61/70	Pending
28	CN	U	CN 204311566 U	2015	Artificial reefs and structures	artificial reef, substrate with attachment, coral island	Triphibian cell group type stereo combination phased array space building	Wen Suyun	China	Private		E04B1/343;;B63B35/44;;B64B1/00;;E04B1/38;;E04H1/04	Active
29	JP	A	JP H11276013 A	1999	Ex situ aquaculture	Aquaculture, larvae collection device, sexual reproduction	Effective artificial coral larva-collecting device and artificial collection of coral larva utilizing air water flow	Toyama Kazuhiro	Japan	Private	Y02A40/81	A01K61/00	Pending
31	CR	A	CR 20190359 A	2019	In situ nursery	nursery, structure, coral cultivation device	Submersible nursery device for artificial cultivation of coral in shallow reefs.	Fundacion Univ De Bogota Jorge Tadeo Lozano	Colombia	Institution	A01K61/00;;A01K61/78;;Y02A40/81;;Y02P60/60	A01K61/00	Pending
32	CN	A	CN 111066692 A	2020	Artificial reefs and structures	artificial reef, coral cultivation, substrate	Cornerstone suite for coral propagation and application of cornerstone suite in coral artificial cultivation	Univ Guangxi	China	Institution	A01K61/00;;C04B28/02;;C04B2111/00758;;C04B2111/74;;C04B2201/50;;Y02A40/81	A01K61/00;;C04B28/02;;C04B111/74	Active
33	AU	B2	AU 2020/331564 B2	2022	Artificial reefs and structures	substrate, glue free grid, coral outplanting	An environment-friendly composite basalt fiber reef base grid suitable for restoration of coral reef substrates and restoration method	South China Sea Inst Oceanology	China	Institution	E02D37/00;;E02D29/06;;E02D3/005;;A01K61/00;;E02B1/00;;E02D2300/0084;;E02D2300/0035;;E02D2300/0051;;Y02A40/81;;Y02A10/26	A01K61/00	Active
36	CN	A	CN 107574123 A	2018	Ex situ aquaculture	symbiont culturing technique	Separation-purification, isolated culture and large-scale production method of tridacna zooxanthellae	South China Sea Inst Oceanology	China	Institution		C12N1/12;;C12N1/02;;C12R1/89	Discontinued
38	CN	B	CN 101735966 B	2012	Other	bacteria, nitrogen fixation, seaweed nurseries, promote high production on coral reef	Strong bacillus G25-1-2 and applications thereof	South China Sea Inst Oceanology	China	Institution		C12N1/20;;A01N63/02;;A01P21/00;;C05F11/08;;C12R1/01	Inactive
39	KR	A	KR 20050008597 A	2005	Artificial reefs and structures	Artificial reef, substrate	Table-coral type artificial ground reef comprising waling, basic part, body, frame part, pole and columnar part	Republic Korea	Korea	NA	A01K61/70;;A01K61/10;;A01K61/54;;E02B3/046;;Y02A40/81	A01K61/00	Active
40	WO	A1	WO 2004/031096 A1	2004	Materials, composites, and adhesives	composition, material fro artificial reef and tiles	Composition suitable for aquatic habitat repair, replacement and/or enhancement	Fernandez Madelaine Joy	US	Private	C04B26/02;;C04B2111/00758;;C04B2111/74;;A01K61/70;;Y02A40/81;;C04B26/02;;C04B2111/74;;C04B2111/00758;;A01K61/70;;Y02A40/81	A01K61/00;;C04B26/02	Pending
41	US	A	US 5543034 A	1996	In situ condition optimisation	Method for enhancing growth, artificial reef, electric	Method of enhancing the growth of aquatic organisms, and structures created thereby	Hilbertz; Wolf H.;;goreau; Thomas J.	US	Private	C25D9/10;;Y10S204/06;;Y02W10/37;;A01K61/50;;A01K61/70;;Y02A40/81;;A01K61/00;;A01K61/30;;A01K61/70;;A01K61/51;;A01K61/40;;C25D9/10;;Y10S204/06;;Y02W10/37;;A01K61/50;;Y02A40/81;;A01K61/54	A01K61/00;;A01K63/04;;C25D9/10	Expired
42	CN	U	CN 209768597 U	2019	In situ nursery	breeding structure, outplanting, nursery	Movable coral breeding device	Univ Hainan Tropical Ocean	China	Institution	Y02A40/81	A01K61/00	Inactive
43	KR	A	KR 20070048587 A	2007	Artificial reefs and structures	artificial reef, structure, substrate, coral transplant	An artificial coral reef which has pyramid structure	The Sea Korea Co Ltd;;Bumin Consturction Co Ltd	Korea	Corporation	A01K61/70;;A01K61/17;;E02B3/046;;Y02A40/81	A01K61/00	Active
44	KR	B1	KR 101163408 B1	2012	Artificial reefs and structures	Artificial reef, transplanting corals, substrate	An artificial coral reef	Korea Fisheries Resources Agency	Korea	Institution	A01K61/70;;E02B3/043;;E02B3/046;;Y02A40/81	A01K61/00	Active
45	MX	A	MX 2019009814 A	2019	In situ nursery	Nursery structure, coral cultivation	Submersible nursery device for artificial cultivation of coral in shallow reefs.	Fundacion Univ De Bogota Jorge Tadeo Lozano	Colombia	Institution	A01K61/00;;A01K61/78;;Y02A40/81;;Y02P60/60	A01K61/00;;A01K61/78	Pending
46	WO	A4	WO 2019/038704 A4	2019	Artificial reefs and structures	Artificial reef, fish reef	Artificial reef made from dead hard coral debris	Behivoke Faustinato	Madagascar	Private	A01K61/70;;Y02A40/81	A01K61/70	Pending
48	CN	U	CN 204272928 U	2015	Artificial reefs and structures	Artificial reef, structure, substrate, outplanting,	Movable coral reef base	Univ Hainan	China	Institution	Y02A40/81	A01K61/00	Inactive
50	CN	A	CN 104221987 A	2014	Ex situ aquaculture	aquaculture, lighting, nursery	Indoor coral culture light control device	Hainan Academy Of Ocean And Fisheries Sciences	China	Institution		A01K63/04	Active
51	CN	A	CN 107897068 A	2018	Ex situ aquaculture	breeding method, clam	Tridacna larvae artificial breeding method capable of improving survival rate during proliferation and releasing	South China Sea Inst Oceanology	China	Institution	A01K61/54;;Y02A40/81	A01K61/54	Active
52	US	A1	US 2020/0367477 A1	2020	Materials, composites, and adhesives	3D printing, nursery substrate,	Artificial coral articles and preparation methods thereof	Schofield Alexander	US	Private	A01K61/70;;A01K61/70;;B33Y10/00;;B29C64/165;;B29C64/165;;B29K2001/08;;B29K2103/04;;B33Y10/00;;B33Y70/10;;B33Y80/00;;B33Y80/00;;C08L1/286;;C08L3/02;;C09J101/02;;C09J101/08;;C09J103/04;;Y02A40/81	A01K61/70;;B29C64/165;;C09J101/02;;C09J101/08;;C09J103/04	Pending
54	JP	A	JP 2003061506 A	2003	Other	implantation-promoting base material	Artificial proliferation tool of coral reef and method for proliferating coral reef	Japan Marine Sci & Technol Ct	Japan	Institution	Y02A40/81	A01K61/00	Expired
55	CN	A	CN 110506674 A	2019	Heat resistance	Method for testing heat resistence, Protocol	Method for assessing heat resistance of coral	Univ Guangxi	China	Institution	A01K61/00;;G01N21/84;;G01N33/535;;Y02A10/26;;Y02A40/81	A01K61/00;;G01N21/84;;G01N33/535	Pending
56	CN	U	CN 204070163 U	2015	In situ nursery	Nursery, coral breeding, structure	Movable type coral breeding device	Univ Hainan	China	Institution	Y02A10/26;;Y02A40/81	A01K61/00	Inactive
57	CN	A	CN 112064573 A	2020	Artificial reefs and structures	Artificial reef, substrate	Construction method of ecological seawall	Univ Zhejiang Water Resources & Electric Power	China	Institution	E02B3/00;;E02B3/06;;E02B3/12;;Y02A10/11	E02B3/00;;E02B3/06;;E02B3/12	Active
58	CN	U	CN 215223990 U	2021	In situ nursery	Nursery, structure, coral breeding	Coral nursery frame capable of preventing fishing net	Univ Guangxi	China	Institution		A01K61/00;;A01K61/70	Active
61	CN	A	CN 110036947 A	2019	Ex situ aquaculture	coral larvea cultivation, asexual reproduction, method	Method for inducing coralline planula larvae to improve adhesion capability	Shenzhen Inst Information Tech	China	Institution	A01K61/00;;Y02A10/26;;Y02A40/81	A01K61/00	Active
63	WO	A1	WO 2002/053310 A1	2002	Artificial reefs and structures	artificial reef, substrate	Artificial reef and method of fabrication thereof	Artificial Reef Inc;; Bartowski Michael Scott	US	Corporation	B28B7/0029;;B22C9/24	B22C9/24;;B28B7/00	Pending
64	CN	A	CN 101735966 A	2010	Other	bacteria, nitrogen fixation, seaweed nurseries, promote high production on coral reef	Strong bacillus G25-1-2 and applications thereof	South China Sea Inst Oceanology	China	Institution		C12N1/20;;A01N63/02;;A01P21/00;;C05F11/08;;C12R1/01	Inactive
65	CN	A	CN 104521842 A	2015	Artificial reefs and structures	artificial reef, substrate	Layered artificial reef depending on wind power supply	Univ Changsha Science & Tech	China	Institution	A01K61/00;;Y02A40/81;;Y02P60/60	A01K61/00	Inactive
66	CN	A	CN 107197805 A	2017	Artificial reefs and structures	Aquaculture,,aquarium system	Coral reef system for simulating natural ecological environment and construction method thereof	Kunming Touling Tech Co Ltd	China	Corporation	A01K61/70;;A01G33/00;;A01K61/00;;A01K61/10;;Y02A40/80;;Y02A40/81	A01K61/70;;A01G33/00;;A01K61/00;;A01K61/10	Active
67	CN	U	CN 211523091 U	2020	Artificial reefs and structures	Nursery, artificial reef,	Floating breakwater suitable for artificial island and provided with power generation system	Univ Dalian Tech	China	Institution	Y02A10/11;;Y02A40/81;;Y02E10/72;;Y02E10/727;;Y02P60/60	E02B3/06;;A01K61/00;;A01K61/70;;A01K61/75;;A01K61/78;;F01D15/10;;F03D9/25;;F03D13/25	Active
68	CN	A	CN 113216081 A	2021	Artificial reefs and structures	Artificial reef, substarte	Ecological breakwater compounded by submerged breakwater and square hole grid artificial fish reef	Univ Dalian Tech	China	Institution	A01K61/00;;A01K61/73;;E02B3/06;;E02B8/06;;Y02A10/11;;Y02A40/81	E02B3/06;;A01K61/00;;A01K61/73;;E02B8/06	Pending
69	CN	U	CN 212956350 U	2021	Artificial reefs and structures	Artificial reef	Structure for coastline ecological restoration by using bionic stones	Fujian Luhai Ecological Tech Center Co Ltd	China	Corporation	Y02A10/26	E02B3/04;;B63B22/00;;E02B15/04	Active
70	AU	A4	AU 2014/101432 A4	2015	Materials, composites, and adhesives	Antifouling coral rearing substrate, Nursery	Coral rehabilitation technique	Newsouth Innovations Pty Ltd	Australia	Corporation	Y02A10/26;;Y02A40/81	A01K61/00;;A01K63/00	Inactive
71	CN	A	CN 106489807 A	2017	In situ condition optimisation	Device, in field temperature lowering pump	Seawater temperature lowering device used for governing coral reef albino	Univ Changsha Science & Tech	China	Institution	A01K63/065;;Y02A40/81	A01K61/77;;A01K63/06	Active
72	CN	A	CN 101548661 A	2009	In situ nursery	Method, coral transplantation, cultivation	Composite transplantation method of coral	Hong Chen	China	Private		A01K67/033	Discontinued
73	WO	A1	WO 2015/185960 A1	2015	Artificial reefs and structures	artificial reef, lobster, coral nursery	Electric arc furnace unprocessed slag as a support base for artificial reef for the creation, protection, enhancement of marine fisheries in the design and construction of marine fisheries modules and other environmental uses	Habib Nadia Fouad;;almheiri Shaheen Mohamed Abdulaziz	United Arab Emirates	Private	A01K61/70;;E02B3/046;;Y02A40/81	E02B3/00	Pending
75	AU	A1	AU 2020/363001 A1	2022	Materials, composites, and adhesives	Composite, material, 3D printing	Biomaterial composite, peptide-based adhesives and methods of use thereof	Univ King Abdullah Sci & Tech	Saudi Arabia	Institution	C04B2111/00181;;C04B2111/00758;;C04B26/026;;B33Y10/00;;B33Y70/00;;B33Y80/00;;C07K5/1016;;C07K5/1019;;C07K5/101;;C07K7/06;;E02B3/046	A01K61/70;;B33Y10/00;;B33Y70/00;;B33Y80/00;;C04B26/02;;C07K5/00;;C07K7/00;;E02B3/04	Pending
76	CN	A	CN 109757408 A	2019	Artificial reefs and structures	Method, artificial reef, transplant coral, nursery	Rapid coral reef forming method	Hainan Nanhai Tropical Ocean Res Inst	China	Institution	Y02A40/81	A01K61/00	Pending
77	CN	A	CN 112592869 A	2021	Other	Bacteria, promote larvae settling and growth, sexual reproduction	Strain of bacillus indicus with effect of efficiently inducing attachment and metamorphosis of coral larvae, and application thereof	South China Sea Inst Oceanology	China	Institution	A01K61/00;;Y02A10/26;;Y02A40/81	C12N1/20;;A01K61/00;;C12R1/07	Active
78	CN	A	CN 109759387 A	2019	In situ condition optimisation	device, remove silt from reef	Device for cleaning silt on coral reef	Univ Changsha Science & Tech	China	Institution	Y02A10/26;;Y02A40/81	B08B3/10;;A01K61/00;;B08B13/00	Pending
79	NL	C1	NL 1030954 C1	2007	Artificial reefs and structures	artificial reef, substrate, fish reef	Artificial ecological coral reef system is for use in outdoor fish farm projects and is composed of specially formulated cement types	Willard Philippus Johannes	The Netherlands	Private	A01K61/70;;Y02A40/81	A01K61/00	Inactive
81	CN	U	CN 210470677 U	2020	Artificial reefs and structures	Artificial reef, substrate	Porous stable ecological concrete coral reef structure	Univ Hainan	China	Institution	Y02A40/81	A01K61/00;;A01G33/00	Active
82	WO	A1	WO 2021/070083 A1	2021	Materials, composites, and adhesives	Composite, material, 3D printing	Biomaterial composite, peptide-based adhesives and methods of use thereof	Univ King Abdullah Sci & Tech	Saudi Arabia	Institution	C04B2111/00181;;C04B2111/00758;;C04B26/026;;B33Y10/00;;B33Y70/00;;B33Y80/00;;C07K5/1016;;C07K5/1019;;C07K5/101;;C07K7/06;;E02B3/046	B33Y10/00;;A01K61/70;;B33Y70/00;;B33Y80/00;;C04B26/02;;C07K5/00;;C07K7/00;;E02B3/04	Pending
83	CN	A	CN 110604074 A	2019	In situ condition optimisation	method, device, pump for lowering temperature	Well drilling type artificial upwelling coral protecting method and device	Univ Zhejiang	China	Institution	A01K61/00;;Y02A40/81	A01K61/00	Discontinued
84	US	B1	US 7513711 B1	2009	Artificial reefs and structures	Limestone artificial reef, fish reef	Artificial marine reef inducement structure	Walter David	US	Private	A01K61/70;;A01K61/70;;Y02A40/81;;Y02A40/81	A01B61/00	Inactive
85	JP	A	JP 2010011822 A	2010	Artificial reefs and structures	substrate fixation, coral cultivation plate	Coral artificial multiplying tool, and method for artificially multiplying coral	Idea Consultants Inc	Japan	Corporation	Y02A40/81	A01K61/00	Active
86	CN	A	CN 110476837 A	2019	Heat resistance	Method, Increase coral heat resistance	Method for improving heat resistance of cup-shaped corals	Univ Guangxi	China	Institution	A01K61/00;;Y02A10/26;;Y02A40/81	A01K61/00	Pending
87	CN	A	CN 110310008 A	2019	Restoration protocols and methods	Method and device, coral nursery;coral cultivation, software for tracing coral, cultivation training system	Coral cultivation platform	Huang Lu;;chen Xiongping	China	Private	A01K61/00;;G06Q10/06;;G06Q50/02;;Y02A40/81	G06Q10/06;;A01K61/00;;G06Q50/02	Pending
88	CN	A	CN 104196001 A	2014	Artificial reefs and structures	device, Artificial reef, substrate	Detachable artificial coral reef	Chen Chaoyang	China	Private	Y02A40/81	E02B17/02;;A01K61/00	Discontinued
89	CN	A	CN 113785793 A	2021	Ex situ aquaculture	device, remove silt from reef	Cultivation sediment removing device for soft corals	Marine Fisheries Res Inst Zhejiang	China	Institution	A01K63/04;;A01K63/042;;A01K63/045;;A01K61/00	A01K63/04;;A01K61/00	Pending
90	JP	A	JP H11308939 A	1999	Artificial reefs and structures	artificial reef, substrate, coral transplanting, coral cultivation	Mass-transplantation of reef building coral seedling obtained by artificial seedling collection and gardening of coral reef	Toyama Kazuhiro	Japan	Private	Y02A40/81	A01K61/00;;E02B1/00	Pending
91	CN	U	CN 204949140 U	2016	Ex situ aquaculture	Aquaculture tool, coral breeding, nursery, control system	Coral artificial breeding control system	Hangzhou Lengbeiguan Tech Co Ltd	China	Corporation	Y02A40/81	A01K61/00	Inactive
93	CN	U	CN 204409262 U	2015	Artificial reefs and structures	Artificial reef, structure, substrate, outplanting	Layered artificial reef powered by wind power	Univ Changsha Science & Tech	China	Institution	Y02A40/81;;Y02P60/60	A01K61/00	Inactive
94	CN	A	CN 113925001 A	2022	Restoration protocols and methods	method, protocol, coral cultivvation fro resilience	Coral restoration method based on coral diversity and environmental adaptability	Hainan Academy Of Ocean And Fisheries Sciences	China	Institution	A01K61/00;;A01G31/00;;A01G33/00	A01K61/00;;A01G31/00;;A01G33/00	Pending
97	CN	A	CN 109169413 A	2019	Restoration protocols and methods	method, fragmentation, transplanting	Separating method and transplanting method of single coral cup in helmet-shaped coral	South China Sea Inst Oceanology	China	Institution	A01K61/00;;Y02A40/81	A01K61/00	Active
98	CN	U	CN 203968948 U	2014	Artificial reefs and structures	Artificial reef, substrate, structure, coral outplanting	Seabed quicksand environment coral transplant reef foundation	Univ Hainan	China	Institution	Y02A10/26;;Y02A40/81	A01K61/70	Inactive
99	CN	U	CN 208844502 U	2019	Artificial reefs and structures	Artificial reef, substrate	South China Sea island ecological bank protection structure based on porous rock blocks	Inst Geographic Sciences & Natural Resources Res Cas	China	Institution		E02B3/12;;E02B3/14	Inactive
100	CN	A	CN 109006617 A	2018	Artificial reefs and structures	artificial reef, substrate, coral transplanting	Hollow mimetic artificial coral reef body	South China Sea Inst Oceanology	China	Institution	A01K61/77;;A01G33/00;;Y02A40/80;;Y02A40/81	A01K61/77;;A01G33/00	Pending
102	AU	A1	AU 2018/450782 A1	2020	Artificial reefs and structures	artificial reef, substrate	Artificial ecological reef of composite concrete material for ecological restoration of coral reefs	South China Sea Inst Oceanology	China	Institution	A01K61/70;;Y02A40/81	A01K61/70	Active
103	AU	B2	AU 2018/450782 B2	2021	Artificial reefs and structures	concrete artificial reef, substrate	Artificial ecological reef of composite concrete material for ecological restoration of coral reefs	South China Sea Inst Oceanology	China	Institution	A01K61/70;;Y02A40/81	A01K61/70	Active
104	US	A	US 5803660 A	1998	Artificial reefs and structures	artificial reef, substrate	Integrated reef building system	Warren; Donald J.;;warren; Daniel T.	US	Private	E02B3/046;;F01B1/12	E02B3/04;;F01B1/12	Expired
105	CN	A	CN 109699548 A	2019	Artificial reefs and structures	artificial reef, substrate	Artificial ecological reef made of composite concrete material for ecological restoration of coral reefs	South China Sea Inst Oceanology	China	Institution	A01K61/70;;Y02A40/81	A01K61/70	Active
106	AU	A1	AU 2020/364137 A1	2022	Artificial reefs and structures	Artificial reef, substrate, nursery, tiles, propagation, transplanting	Marine tiles, pods, tanks and methods of use therof	Univ King Abdullah Sci & Tech	Saudi Arabia	Institution	E02B3/046	E02B3/04	Pending
107	EG	A	EG 26983 A	2015	Artificial reefs and structures	Artificial reef, substrate, transplant	Artificial structures for helping in coral rehabilitation	Amro Abd Elhamid Abd Elyzim Mohamed;;mohamed Mahmoud Aly Abou-zaid Prof	Egypt	Private		A01K63/00;;A01K63/04	Pending
108	JP	A	JP 2011125293 A	2011	Artificial reefs and structures	Transplanting	Coral transplanting method, coral transplantation base, coral transplantation block and method for forming coral reef	Kajima Corp	Japan	Corporation	Y02A10/26;;Y02A40/81	A01K61/00	Active
110	CN	A	CN 105660475 A	2016	Artificial reefs and structures	artificial reef	Basalt fiber grid structure suitable for ecological restoration of coral reef	Univ Southeast;;beijing Tangbang Energy Tech Co Ltd;;jiangsu Green Mat Vally New Mat T&d Co Ltd	China	Institution	A01G33/00;;Y02A10/26;;Y02A40/81	A01K61/00;;A01G33/00	Active
112	JP	A	JP H07119129 A	1995	Artificial reefs and structures	artificial reef, substrate	New idea of sphere-shaped solid void structure	Sugito Tsuneo	China	Institution	Y02A10/11;;Y02A40/81	A01K61/00;;B29C69/00;;B29D99/00;;B29K23/00;;B29L31/60;;E02B3/06	Pending
113	JP	A	JP 2003339268 A	2003	Artificial reefs and structures	Artificial reef, fish reef	Artificial coral reef	Ain Kk Sogo Kenkyusho	Japan	NA	Y02A40/81	A01K61/00	Pending
115	KR	B1	KR 101624469 B1	2016	Artificial reefs and structures	ship artificial reef	Shipwreck reef with shelter device combined with ballast concrete	Haejoo Enc Co Ltd;;paik Sang Hyun	Korea	Corporation	Y02A40/81	E02B3/04	Active
117	CN	A	CN 113142102 A	2021	In situ nursery	Method, site selection, transplanting; deep sea corals	Site selection and planting method and device for establishing deepwater coral seabed culture farm	Univ China Petroleum East China	China	Institution	A01K61/00;;G01V1/306;;Y02A40/81	A01K61/00;;G01V1/30	Pending
118	CN	A	CN 107646750 A	2018	In situ condition optimisation	Coral nursery, increase growth, decreas acidity	Coral cultivation device for lowering seawater acidity to promote growth of corals	Univ Changsha Science & Tech	China	Institution	A01K61/00;;C02F1/42;;C02F1/66;;C02F2001/422;;C02F2103/08;;Y02A10/26;;Y02A40/81	A01K61/00;;C02F1/42;;C02F1/66;;C02F103/08	Active
119	US	A1	US 2009/0304453 A1	2009	Artificial reefs and structures	Artificial reef, substrate	Mooring habitat structure	Hardison Stewart	US	Private	B63B21/29;;B63B21/29;;E02B3/04;;E02B3/04;;E02B3/24;;E02B3/24	E02D5/74	Discontinued
120	CN	A	CN 110973013 A	2020	Restoration protocols and methods	coral transplanting method & device	Coral transplanting method	Univ Southeast	China	Institution	A01K61/00;;Y02A10/26;;Y02A40/81	A01K61/00	Pending
121	CN	U	CN 214126548 U	2021	Artificial reefs and structures	susbstrate, nursery, coral cultivation, structure	Artificial ecological coral nursery	Sanya Coral Reef Ecological Res Institute	China	Institution	Y02A40/81	A01K61/00	Active
123	CN	U	CN 210808819 U	2020	Artificial reefs and structures	artificial reef, substrate\	Coral repair type artificial fish reef convenient to transport	Liu Mengyong	China	Private	Y02A40/81	A01K61/73	Active
126	CN	U	CN 204217685 U	2015	Ex situ aquaculture	aquaculture tool, lighting	Light-operated distributing device for indoor cultivation of corals	Hainan Academy Of Ocean And Fisheries Sciences	China	Institution		A01K63/06	Inactive
127	MX	A	MX 2013014624 A	2015	Artificial reefs and structures	substrate	Ballast for assemblable buoys, which includes upper cavities for hosting aquatic fauna, including an inner and outer steel structure with a base having fasteners for marine sculptures and/or advertising elements.	Robles Héctor Hernandez	Mexico	Private		A01K75/06	Pending
128	KR	A	KR 20150064608 A	2015	Artificial reefs and structures	artificial reef	Complex structure of artificial beach and coral pool based on vlfs(very large floating structure)	Daewoo Shipbuilding & Marine Engeneering Corp	Korea	Corporation	B63B35/00;;E04H4/00	B63B38/00;;E04H4/00	Discontinued
129	ES	A6	ES 2002911 A6	1988	Artificial reefs and structures	Structure, Substrate, coral settlement	Artificial arrecife for the settlement and development of the red coral (Machine-translation by Google Translate, not legally binding)	Ecotecnos S A	Spain	Corporation	Y02A40/81	E02B3/04	Expired
130	CN	U	CN 213961368 U	2021	Artificial reefs and structures	artificial reef, substrate, outplanting	Trapezoidal artificial reef body for promoting ecological restoration of coral reef	Univ Guangxi	China	Institution	Y02A40/81	A01K61/77	Active
132	CN	U	CN 206453005 U	2017	Artificial reefs and structures	artificial reef, substrate, outplanting	Adjustable coral of assembled is transplanted and is lured dual -purpose reef of fish gathering crowd base	Univ Chongqing	China	Institution	Y02A40/81	A01K61/70;;A01K61/00;;A01K61/10;;A01K61/73	Inactive
133	CN	A	CN 109169459 A	2019	Artificial reefs and structures	artificial reef	Eco-friendly artificial mimic coral reef	South China Sea Inst Oceanology	China	Institution	A01K61/77;;Y02A40/81	A01K61/77	Active
134	CN	A	CN 108713516 A	2018	In situ nursery	Nursery protection device	Temporary culture protection device and method for bottom sowing transplanting trochus	South China Sea Inst Oceanology	China	Institution	A01K61/53;;A01K61/51;;Y02A10/26;;Y02A40/81	A01K61/53;;A01K61/51	Discontinued
135	AU	A1	AU 2019/236673 A1	2020	Materials, composites, and adhesives	Clip for securing coral, transplanting, nursery	Method of, and apparatus for, rehabilitation of coral reefs	Edmondson John Philip Mr	Australia	Private	A01K61/00;;A01K63/006;;F16B1/00;;Y02A10/26;;Y02A40/81	A01K61/00;;A01K63/00;;F16B1/00	Pending
136	WO	A1	WO 2020/042456 A1	2020	Artificial reefs and structures	Artificial reef, substrate	Environmentally friendly artificial mimic coral reef body	South China Sea Inst Oceanology	China	Institution	A01K61/77;;Y02A40/81	A01K61/77	Pending
138	CN	A	CN 110476857 A	2019	Artificial reefs and structures	fish reef, artificial reef	Basalt fiber reinforced landscape fish reef and design method	Univ Hainan	China	Institution	A01K61/73;;C04B28/00;;Y02A40/81	A01K61/73;;C04B28/00	Pending
139	WO	A1	WO 2018/178871 A1	2018	In situ nursery	coral propagation/cultivation, nursery	Submersible nursery device for artificial cultivation of coral in shallow reefs	Fundacion Univ De Bogota Jorge Tadeo Lozano	Colombia	Institution	A01K61/00;;A01K61/78;;Y02A40/81;;Y02P60/60	A01K61/00;;A01K61/78	Pending
141	CN	U	CN 215105043 U	2021	Artificial reefs and structures	artificial reef, substrate, fish reef	Ecological breakwater compounded by submerged breakwater and square hole grid artificial fish reef	Univ Dalian Tech	China	Institution		E02B3/06;;A01K61/00;;A01K61/73;;E02B8/06	Active
142	JP	A	JP 2006025722 A	2006	In situ nursery	NA	Method for artificially proliferating coral reef and bed for artificial proliferation	Ain Corp Ltd	Japan	Corporation	Y02A40/81	A01K61/00	Pending
143	CN	U	CN 209677107 U	2019	Artificial reefs and structures	Nursery, structure, coral breeding, aquaculture	Artificial ecological reef with pipeline and coral proliferation function	Shenzhen Shilang Bihai Marine Tech Co Ltd	China	Corporation	Y02A40/81	A01K61/73	Active
144	CN	A	CN 107736286 A	2018	In situ condition optimisation	automated coral nutrition	Coral nutrition supply device for coping with abnormal increase of seawater temperature	Univ Changsha Science & Tech	China	Institution	A01K61/80;;A01K61/00;;Y02A10/26;;Y02A40/81;;Y02P60/60	A01K61/80;;A01K61/00	Active
146	US	A1	US 2017/0196206 A1	2017	In situ nursery	Coral nursery, rope	Coral nursery based on overgrowth of a tensioned line	Ross Andrew Mackay	US	Private	A01K61/70;;A01K61/30;;A01K61/75;;Y02A40/81;;A01K61/75;;A01K61/70;;A01K61/30;;Y02A40/81	A01K61/75	Active
147	US	B2	US 8388163 B2	2013	Ex situ aquaculture	Aquaculture, nursery, lights	Marine LED lighting system and method	Orbital Technologies Corp	US	Corporation	A01K63/06;;C12M21/02;;C12M31/10;;C12M41/06;;Y10S362/805;;A01G9/249;;A01G7/045;;A01K63/06;;C12M21/02;;C12M31/10;;C12M41/06;;Y10S362/805;;A01G7/045	A01G7/04;;F21V33/00;;A01K63/06;;H05B44/00	Inactive
148	KR	B1	KR 101334910 B1	2013	Restoration protocols and methods	tiles, coral rearing substrate, outplanting, nursery	Soft coral creating method using artificial structure	Korea Fisheries Resources Agency	Korea	Institution	A01K61/00;;A01K61/70;;A01K67/033;;E02B3/043;;E02B3/046;;Y02A40/81	A01K61/00	Active
149	CN	A	CN 110476836 A	2019	Heat resistance	Heat resistance	Method for improving heat resistance of staghorn corals	Univ Guangxi	China	Institution	A01K61/00;;Y02A40/81;;Y02A10/26	A01K61/00	Active
150	CN	U	CN 205623872 U	2016	Other	sexual reproduction,	Device is broadcast at directional end of coral larva	Univ Guangdong Ocean;;shenzhen Ocean Univ Of Guangdong Res Inst;;shenzhen Bihailantian Ocean Tech Co Ltd	China	Institution	Y02A10/26;;Y02A40/81	A01K61/00	Active
151	US	B2	US 10791720 B2	2020	In situ nursery	Aquaculture, nursery, propagation, structure	Coral nursery based on overgrowth of a tensioned line	Ross Andrew Mackay	Jamaica	Private	A01K61/70;;A01K61/30;;A01K61/75;;Y02A40/81;;A01K61/75;;A01K61/70;;A01K61/30;;Y02A40/81	A01K61/75;;A01K61/30;;A01K61/70	Active
152	CN	A	CN 104026082 A	2014	Ex situ aquaculture	sexual propagation, ex situ cultivation	Sexual artificial propagation technique for hermatypic corals	Univ Guangdong Ocean	China	Institution		A01K67/033	Inactive
155	WO	A1	WO 2021/041962 A1	2021	Ex situ aquaculture	3D printing, nursery substrate, promote algae	Structure and method for promoting microalgae growth	Univ California;;univ Of Cambridge	US	Institution	B33Y80/00;;B29C64/129;;B29C64/277;;B33Y10/00;;B33Y70/10;;C12N1/12	C12N1/12;;C12N1/14	Pending
156	US	B2	US 6464429 B2	2002	Artificial reefs and structures	Artificial reef, substrate	Artificial reef module for coral reef remediation	Moore Michael D.	US	Private	E02B3/046;;Y02A10/26	E02B3/04	Expired
157	KR	B1	KR 100562676 B1	2006	Artificial reefs and structures	artifical reef, fish reef	Table-coral type artificial reef	NA	NA	NA	A01K61/70;;A01K61/10;;A01K61/54;;E02B3/046;;Y02A40/81	A01K61/00	Active
158	CN	A	CN 103698361 A	2014	Ex situ aquaculture	Aquaculture,	Model test device and method for researching growth influence factors of artificial coral reef	Univ Shanghai Jiaotong;;no 708 Inst China State Shipbuilding Corp	China	Institution		G01N27/00;;G01B7/06;;G01B7/28	Active
159	AU	B1	AU 2018/286614 B1	2020	Artificial reefs and structures	artificial reef, substrate for coral colonisation	An eco-friendly artificial mimetic coral reef	South China Sea Inst Oceanology	China	Institution	A01K61/77;;Y02A40/81	A01K61/70	Active
160	CN	A	CN 106719111 A	2017	Ex situ aquaculture	Auquaculture, coral nutrition, ex situ cultivation	Artificial cultivation method of coral segmentation propagation	Univ Fujian	China	Institution	A01K61/00;;Y02A40/81;;Y02P60/87	A01K61/00;;A23K10/14;;A23K10/18;;A23K10/20;;A23K10/22;;A23K10/30;;A23K20/158;;A23K20/174;;A23K50/80	Active
161	CN	U	CN 210168762 U	2020	Artificial reefs and structures	artificial reef, substrate, outplanting	Anti-settling artificial coral reef	South China Sea Fisheries Res Institute;;Chinese Academy Of Fishery Sciences	China	Institution	Y02A40/81	A01K61/73	Active
162	US	A	US 5564369 A	1996	Artificial reefs and structures	artificial reef, substrate	Reef ball	Barber; Todd R.;;barber; Gerald L.	US	Private	A01K63/006;;B28B7/0029;;B28B7/32;;A01K61/70;;Y02A40/81;;B28B7/0029;;B28B7/32;;A01K63/006;;A01K61/70;;Y02A40/81	A01K61/00;;A01K61/70;;A01K63/00;;B28B7/00;;B28B7/32	Expired
163	CN	U	CN 214206830 U	2021	In situ nursery	nursery, structure, coral cultivation	Artificial nursery frame beneficial to coral reef ecological restoration	Univ Guangxi	China	Institution	Y02A40/81	A01K61/70	Active
166	CN	A	CN 110606715 A	2019	Artificial reefs and structures	3D printing, substrate	Latticed concrete artificial coral reef and preparation method and application thereof	Univ Tongji;;jiangsu Soft & Strong Materials Tech Co Ltd	China	Institution	A01K61/00;;C04B28/04;;C04B2111/00181;;Y02A40/81	C04B28/04;;A01K61/00	Active
167	US	A	US 5836265 A	1998	Artificial reefs and structures	artificial reef, substrate	Reef ball	Barber; Todd R.;;barber; Gerald L.	US	Private	A01K63/006;;B28B7/0029;;B28B7/32;;A01K61/70;;Y02A40/81;;B28B7/0029;;B28B7/32;;A01K63/006;;A01K61/70;;Y02A40/81	A01K61/00;;A01K61/70;;A01K63/00;;B28B7/00;;B28B7/32	Expired
169	CN	U	CN 203963711 U	2014	Ex situ aquaculture	aquaculture, lighting, nursery	LED lamp used for artificial breeding of coral	Qin Ji	China	Private		F21S8/00;;A01K63/06;;F21V5/04;;F21V23/04;;F21Y101/02	Inactive
170	KR	B1	KR 101223525 B1	2013	Artificial reefs and structures	artificial reef	The foundation a method of construction of sea the infrastructure	Hyundai Heavy Ind Co Ltd	Korea	Corporation	E02B17/00;;E02B3/046;;E02B3/122;;E02B2017/006;;E02B2017/0073;;E02D27/52;;E02D2600/30;;Y02A40/81	E02B17/00;;A01K61/00;;E02D27/52	Inactive
171	TW	B	TW I251463 B	2006	Artificial reefs and structures	concrete structure, artificial reef, substrate	Method for forming artificial coral reef	National Museum of Marine Biology & Aquarium	Taiwan	Institution	Y02A40/81	A01K61/00	Inactive
172	CN	A	CN 102630646 A	2012	Restoration protocols and methods	coral disease	Shotgun shooting type artificial infection method of coral	Univ Hainan	China	Institution		A01K67/033	Inactive
173	CN	U	CN 205987835 U	2017	Other	sexual propagation, larvae attachment substratum	Coral sexual propagation young adherance is fixing device under water	Guangxi Acad Of Oceangraphy	China	Institution	Y02A40/81	A01K61/00	Inactive
174	CN	A	CN 113307577 A	2021	Artificial reefs and structures	substrate, artificial reef, transplating	Antler coral reef imitating material beneficial to induction of coral attachment and preparation method of antler coral reef imitating material	Univ Hainan;;sanya Coral Reef Ecological Res Institute	China	Institution	C04B28/04;;C04B38/10;;A01K61/00;;C04B2111/40;;Y02A40/81	C04B28/04;;A01K61/00;;C04B38/10;;C04B111/40	Active
177	PH	A1	PH 12018000164 A1	2020	In situ nursery	coral propagation/cultivation, nursery	Method of rehabilitating damaged reef areas using asexually reproduced corals and device	Gulayan Samuel J	Philippines	Private	Y02A40/81	A01K61/00	Pending
178	US	A1	US 2004/0065266 A1	2004	Materials, composites, and adhesives	Composite, material, artificial reef, nursery, tiles	Composition suitable for aquatic habitat repair, replacement and/or enhancement	Fernandez Madelaine Joy	US	Private	C04B26/02;;C04B2111/00758;;C04B2111/74;;A01K61/70;;Y02A40/81;;C04B26/02;;C04B2111/74;;C04B2111/00758;;A01K61/70;;Y02A40/81	A01K61/00;;C04B26/02	Active
180	WO	A1	WO 2002/068762 A1	2002	Artificial reefs and structures	Artificial reef, substrate	Artificial reef module for coral reef remediation	Michael Moore	US	Private	E02B3/046;;Y02A10/26	E02B3/04	Pending
181	CN	A	CN 110820678 A	2020	Artificial reefs and structures	Substrate	Ecological dual-purpose coral reef floating type bulwark suitable for artificial island and power generation system	Univ Dalian Tech	China	Institution	A01K61/00;;A01K61/70;;A01K61/75;;A01K61/78;;E02B3/06;;E02B3/062;;F01D15/10;;F03D9/257;;F03D13/25;;Y02A10/11;;Y02A40/81;;Y02E10/72;;Y02E10/727;;Y02P60/60	E02B3/06;;A01K61/00;;A01K61/70;;A01K61/75;;A01K61/78;;F01D15/10;;F03D9/25;;F03D13/25	Pending
182	CN	A	CN 104285900 A	2015	Restoration protocols and methods	coral propagation method	Artificial reproduction method of soft coral	Suzhou City Xiangcheng Distr New Era Special Aquatic Farm	China	Institution	A01K61/00	A01K67/033	Inactive
183	JP	A	JP 2004129640 A	2004	Artificial reefs and structures	Artificial reef, fish reef	Method for developing artificial fishing bank of tropical or subtropical sea area type by utilizing reef-producing type coral as part of the bank	Okikaiko Kk	Japan	Corporation	Y02A40/81	A01K61/00	Pending
184	CN	A	CN 107805037 A	2018	Materials, composites, and adhesives	material, substrate	Coral-imitating porous structural material for modification of marine environment and preparation method of coral-imitating porous structural material	Hainan Zhaocheng Tech Development Co Ltd	China	Corporation	A01K61/70;;C04B28/30;;C04B2111/00508;;C04B2111/00758;;C04B2111/24;;C04B2111/40;;C04B2111/74;;C04B2201/50;;Y02A40/81	C04B28/30;;A01K61/70;;C04B38/10;;C04B111/24;;C04B111/40;;C04B111/74	Active
185	CN	A	CN 105994091 A	2016	Artificial reefs and structures	artificial reef, structure, substrate	Basalt fiber cay ecological restoration multi-dimensional reef	South China Sea Inst Oceanology	China	Institution	A01K61/00;;Y02A40/81	A01K61/00	Pending
188	US	B2	US 7285238 B2	2007	Artificial reefs and structures	Artificial reef, substrate	Reef artifact	Reefmatters Llc	US	Institution	B29C33/3857;;B29C33/3857;;E02B3/046;;E02B3/046;;Y02A10/26;;Y02A10/26	B28B1/14;;B28B7/06;;B28B7/16;;B28B7/20;;B28B7/30;;B29C33/38;;B29C33/40;;E02B3/04	Inactive
190	TW	A	TW 200600007 A	2006	Artificial reefs and structures	artificial reef, structure, substrate	Method for constructing artificial coral reef	National Museum of Marine Biology & Aquarium	Taiwan	Institution	Y02A40/81		Inactive
193	WO	A1	WO 2021/070081 A1	2021	Ex situ aquaculture	Artificial reef, substrate, nursery, tiles, propagation, transplanting	Marine tiles, pods, tanks and methods of use therof	Univ King Abdullah Sci & Tech	Saudi Arabia	Institution	E02B3/046	E02B3/04	Pending
194	WO	A1	WO 2021/164319 A1	2021	Artificial reefs and structures	Composite, material, structure	Environment-friendly composite basalt fiber reef base grid suitable for coral reef substrate restoration and restoration method	South China Sea Inst Oceanology	China	Institution	E02D37/00;;E02D29/06;;E02D3/005;;A01K61/00;;E02B1/00;;E02D2300/0084;;E02D2300/0035;;E02D2300/0051;;Y02A40/81;;Y02A10/26	A01K61/00	Pending
195	WO	A1	WO 2010/034318 A1	2010	Artificial reefs and structures	artificial reef, substrate, coral transplanting	Support base (artificial reef) for implantation of corals	Habib Nadia Fouad	Egypt	Private	A01K61/70;;E02B3/046;;E02B2201/04;;Y02A10/26;;Y02A40/81;;Y02W30/62	E02B3/00	Pending
196	KR	B1	KR 100808098 B1	2008	Artificial reefs and structures	artificial reef, substrate, coral outplanting	An artificial coral reef which has pyramid structure	NA	NA	NA	A01K61/70;;A01K61/17;;E02B3/046;;Y02A40/81	A01K61/00	Active
197	CN	A	CN 104737988 A	2015	Restoration protocols and methods	method, coral transplanting, coral cultivation	Meshed coral transplanting method	Hainan Nanhai Tropical Ocean Res Inst	China	Institution	A01K67/033	A01K67/033	Discontinued
198	CN	A	CN 108676723 A	2018	Ex situ aquaculture	culture method for symbionts	New genus new species algae from ocean coral and isolated culture method thereof	Univ Shanghai Jiaotong	China	Institution	C12N1/125;;C12R2001/89;;C12N1/02;;C12N1/12	C12N1/12;;C12N1/02;;C12R1/89	Active
199	CN	U	CN 213961369 U	2021	Artificial reefs and structures	artificial reef, substrate	Hemispherical artificial reef body for repairing ocean coral reef ecosystem	Univ Guangxi	China	Institution	Y02A40/81	A01K61/77	Active
201	CN	A	CN 103858799 A	2014	In situ nursery	nursery, device, method, coral cultivation	Underwater corallum cultivation nursery garden and application thereof	Guangxi Mangrove Res Ct	China	Institution	Y02A10/26;;Y02A40/81	A01K61/00	Discontinued
204	AU	A1	AU 2020/331564 A1	2021	Artificial reefs and structures	Composite, material, structure	An environment-friendly composite basalt fiber reef base grid suitable for restoration of coral reef substrates and restoration method	South China Sea Inst Oceanology	China	Institution	E02D37/00;;E02D29/06;;E02D3/005;;A01K61/00;;E02B1/00;;E02D2300/0084;;E02D2300/0035;;E02D2300/0051;;Y02A40/81;;Y02A10/26	A01K61/00	Active
205	CN	A	CN 106106272 A	2016	Restoration protocols and methods	breeding method, clam	An artificial breeding method for hippopus hippopus	South China Sea Inst Oceanology	China	Institution	Y02A40/81	A01K61/00	Active
206	CN	A	CN 104255602 A	2015	Other	method, protocol, reef restoration with fish	Coral reef ecosystem restoration method through siganus guttatus	Third Inst Oceanography Soa;;Univ Jimei	China	Institution	A01K61/00;;Y02A10/26;;Y02A40/81	A01K61/10	Inactive
207	JP	A	JP H07251436 A	1995	Artificial reefs and structures	artificial reef, substrate	Manufacture of solid space structural body, its shape and utilizing method	Sugito Tsuneo	Japan	Private	Y02A10/11	E02B3/06;;B29C47/00;;B29C48/32;;B29C48/345;;B29C48/90;;B29C65/02;;B29C69/02;;B29K101/12;;B29L31/00;;E02B3/14;;E02B11/00	Expired
208	WO	A1	WO 2019/038704 A1	2019	Artificial reefs and structures	artificial reef, substrate	Artificial reef made from dead hard coral debris	Behivoke Faustinato	Madagascar	Private	A01K61/70;;Y02A40/81	A01K61/70	Pending
209	CN	U	CN 212279438 U	2021	Artificial reefs and structures	artificial reef, substrate, outplanting, nursery	Artificial coral reef	Guangdong Ocean Univ;;shenzhen Bihai Lantian Marine Tech Co Ltd	China	Institution	Y02A40/81	A01K61/00	Active
210	US	A1	US 2008/0112759 A1	2008	Artificial reefs and structures	artificial reef, substrate	Artificial reef anchor structure	Hardison Stewart	US	Private	B63B21/29;;E02B3/046;;E02B3/24;;Y02B10/30	E02B3/04	Discontinued
211	TW	U	TW M551413 U	2017	In situ nursery	nursery, structure, monitoring	Coral restoration device	Univ Shu Te	China	Institution	Y02A40/81	A01K61/00	Active
213	CN	A	CN 106578717 A	2017	In situ condition optimisation	material, coral nutrition, nursery	Preparation and feeding method of sustained-release pellet feed for artificial breeding of corals	Univ Fujian	China	Institution	A01K61/00;;Y02A40/81	A23K50/80;;A01K61/00;;A23K10/18;;A23K10/22;;A23K10/26;;A23K10/30;;A23K20/158;;A23K20/163;;A23K20/174;;A23K20/24;;A23K40/10	Active
214	NL	B1	NL 1043243 B1	2020	Artificial reefs and structures	artificial reef, substrate, coral outplanting	A structure for a substrate rehabilitation system in the marine environment	Fizzy Transition Ventures B V	The Netherlands	Corporation	E02B3/14;;E02B3/12;;E02B3/046;;A01K61/70;;Y02A10/26;;Y02A40/81	E02B3/04;;A01K61/70;;E02B3/12;;E02B3/14	Active
215	CN	U	CN 202153943 U	2012	Artificial reefs and structures	Aquaculture tool	Quick connector of artificial reef coral	Shenzhen Xulian Marine Organisms Culture Co Ltd	China	Corporation	Y02A40/81	A01K61/00	Expired
216	JP	A	JP 2008154471 A	2008	Artificial reefs and structures	artificial reef, substrate	Artificial coral-implanting reef	Daikure Co Ltd;;Harada Tetsuo	Japan	Corporation	Y02A40/81	A01K61/00	Pending
217	CN	A	CN 113841648 A	2021	Artificial reefs and structures	artificial reef, substrate, electric	Artificial reef body for electrically stimulating growth of hermatypic coral	Beibuwan Ocean New Mat Institute	China	Institution	A01K61/73;;A01K61/00	A01K61/73;;A01K61/00	Pending
219	JP	A	JP 2010213597 A	2010	Artificial reefs and structures	artificial reef, substrate, coral transplanting	Cradle-shaped coral artificial culture platform	Okikaiko Kk	Japan	Institution	Y02A40/81	A01K61/00	Active
220	WO	A1	WO 2015/122868 A1	2015	Artificial reefs and structures	artificial reef, substrate	Application of green technology techniques to construct a biodegradable artificial reef	Chemistry Valdosta State University	US	Institution	A01K61/30;;A01K61/30;;A01K61/70;;A01K61/70;;Y02A40/81;;Y02A40/81	A01K61/00	Pending
224	CN	A	CN 112167115 A	2021	Restoration protocols and methods	method, device, coral restoration	Device and method for relieving coral whitening and repairing peat land	Univ Zhongkai Agri & Eng	China	Institution	A01K61/00;;C02F3/322;;C02F2103/08;;Y02A40/81	A01K61/00;;C02F3/32;;C02F103/08	Pending
225	US	B2	US 7997231 B2	2011	Materials, composites, and adhesives	Material, composite for substrate	Composition suitable for aquatic habitat repair, replacement and/or enhancement	Fernandez Madelaine Joy	US	Private	C04B26/02;;C04B2111/00758;;C04B2111/74;;A01K61/70;;Y02A40/81;;C04B26/02;;C04B2111/74;;C04B2111/00758;;A01K61/70;;Y02A40/81	C04B26/02;;A01K61/00	Active

## Sheet: Restoration projects
Dataset from: Boström-Einarsson, Lisa et al. (2020), Coral restoration – a systematic review of current methods, successes, failures and future directions, Dryad, Dataset, https://doi.org/10.5061/dryad.p6r3816

## Sheet: Scientific publications
Authours	Title	Keywords	Affiliations	Year	DOI	Research Areas	Date of Export	UT (Unique WOS ID)
Koch, HR; Wallace, B; DeMerlis, A; Clark, AS; Nowicki, RJ	3D Scanning as a Tool to Measure Growth Rates of Live Coral Microfragments Used for Coral Reef Restoration	3D scanner, microfragment, coral, coral restoration, growth rate, coral propagation, coral reefs, land nursery	Mote Marine Laboratory & Aquarium; Mote Marine Laboratory & Aquarium	2021	10.3389/fmars.2021.623645	Environmental Sciences & Ecology; Marine & Freshwater Biology	2022-06-20	WOS:000651374600001
Forsman, ZH; Toonen, RJ; Gates, RD; Franklin, EC; Knapp, ISS; Rodgers, K; Hughes, K; Maurin, P; Sartor, C; Parry, M; Chung, A; Hixon, MA; Gulko, DA; Wolke, CS; Chan, NT; Torres, LD	The first Hawai'i workshop for coral restoration & nurseries	Hawaii, Coral restoration, Coral nursery, Coral reef, Coral transplantation	University of Hawaii System; University of Hawaii Manoa; National Oceanic Atmospheric Admin (NOAA) - USA; University of Hawaii System; University of Hawaii Manoa	2018	10.1016/j.marpol.2018.08.009	Environmental Sciences & Ecology; International Relations	2022-06-20	WOS:000447104100016
Hein, MY; Birtles, A; Willis, BL; Gardiner, N; Beeden, R; Marshall, NA	Coral restoration: Socio-ecological perspectives of benefits and limitations	Coral restoration, Reef resilience, Sustainability, Socio-ecological systems	James Cook University; Commonwealth Scientific & Industrial Research Organisation (CSIRO); James Cook University	2019	10.1016/j.biocon.2018.11.014	Biodiversity & Conservation; Environmental Sciences & Ecology	2022-06-20	WOS:000456638300004
Doropoulos, C; Vons, F; Elzinga, J; ter Hofstede, R; Salee, K; van Koningsveld, M; Babcock, RC	Testing Industrial-Scale Coral Restoration Techniques: Harvesting and Culturing Wild Coral-Spawn Slicks	aquaculture, coral reef restoration, coral-spawn slick, eco-engineering, Great Barrier Reef, harvest, marine invertebrate larvae, reseeding	Commonwealth Scientific & Industrial Research Organisation (CSIRO); Delft University of Technology	2019	10.3389/fmars.2019.00658	Environmental Sciences & Ecology; Marine & Freshwater Biology	2022-06-20	WOS:000492944700001
Jaap, WC	Coral reef restoration	coral reef, restoration, biological activity		2000	10.1016/S0925-8574(00)00085-9	Environmental Sciences & Ecology; Engineering	2022-06-20	WOS:000088549600014
dela Cruz, DW; Rinkevich, B; Gomez, ED; Yap, HT	Assessing an abridged nursery phase for slow growing corals used in coral restoration	Bolinao, Coral gardening, Coral nursery, Coral restoration, Coral transplantation, Philippines	University of the Philippines System; University of the Philippines Diliman; Southern Cross University	2015	10.1016/j.ecoleng.2015.09.042	Environmental Sciences & Ecology; Engineering	2022-06-20	WOS:000363948000051
Platz, MC; Arias, ME; Byrne, RH	Reef Metabolism Monitoring Methods and Potential Applications for Coral Restoration	Ecosystem metabolism monitoring, Coral reef restoration, Alkalinity anomaly, Net ecosystem calcification, Net ecosystem production	State University System of Florida; University of South Florida; State University System of Florida; University of South Florida	2022	10.1007/s00267-022-01597-9	Environmental Sciences & Ecology	2022-06-20	WOS:000746806800002
Schmidt-Roach, S; Duarte, CM; Hauser, CAE; Aranda, M	Beyond Reef Restoration: Next-Generation Techniques for Coral Gardening, Landscaping, and Outreach	coral restoration, blue economy, adaptive coral gardening, coral seeding hubs, ecotourism	King Abdullah University of Science & Technology; King Abdullah University of Science & Technology	2020	10.3389/fmars.2020.00672	Environmental Sciences & Ecology; Marine & Freshwater Biology	2022-06-20	WOS:000560708200001
Yanovski, R; Abelson, A	Structural complexity enhancement as a potential coral-reef restoration tool	Coral recruitment, Ecological restoration, Habitat complexity, Neighbor's Distance, Point Intercept Contour, Spatial scales	Tel Aviv University	2019	10.1016/j.ecoleng.2019.04.007	Environmental Sciences & Ecology; Engineering	2022-06-20	WOS:000464952200010
Koval, G; Rivas, N; D'Alessandro, M; Hesley, D; Santos, R; Lirman, D	Fish predation hinders the success of coral restoration efforts using fragmented massive corals	Coral restoration, Microfragmentation, Fish predation, Massive corals, Orbicella faveolata, Montastraea cavernosa, Pseudodiploria clivosa, Pseudodiploria strigosa	University of Miami; State University System of Florida; Florida International University	2020	10.7717/peerj.9978	Science & Technology - Other Topics	2022-06-20	WOS:000574775800010
Shearer, TL; Porto, I; Zubillaga, AL	Restoration of coral populations in light of genetic diversity estimates	Reef restoration, Conservation genetics, Genetic diversity, Scleractinian coral, Microsatellite, Rarefaction	University System of Georgia; Georgia Institute of Technology; University of the Andes Colombia; Simon Bolivar University	2009	10.1007/s00338-009-0520-x	Marine & Freshwater Biology	2022-06-20	WOS:000268323800020
Pollock, FJ; Katz, SM; van de Water, JAJM; Davies, SW; Hein, M; Torda, G; Matz, MV; Beltran, VH; Buerger, P; Puill-Stephan, E; Abreg, D; Bourne, DG; Willis, BL	Coral larvae for restoration and research: a large-scale method for rearing Acropora millepora larvae, inducing settlement, and establishing symbiosis	Coral, Conservation, Spawning, Larvae, Restoration, Husbandry, Great Barrier Reef, Coral reef, Symbiodinium, Acropora	Australian Institute of Marine Science; Pennsylvania Commonwealth System of Higher Education (PCSHE); Pennsylvania State University; Pennsylvania State University - University Park; University of Texas System; University of Texas Austin; University of North Carolina; University of North Carolina Chapel Hill; University of North Carolina School of Medicine; Zayed University; Boston University	2017	10.7717/peerj.3732	Science & Technology - Other Topics	2022-06-20	WOS:000411958700002
Boch, CA; Morse, ANC	Testing the effectiveness of direct propagation techniques for coral restoration of Acropora spp.	Coral restoration, Acropora, Asexual and sexual propagation, Direct transplantation	University of California System; University of California Santa Barbara; University of California System; University of California Santa Barbara	2012	10.1016/j.ecoleng.2011.12.026	Environmental Sciences & Ecology; Engineering	2022-06-20	WOS:000301617000003
Hesley, D; Burdeno, D; Drury, C; Schopmeyer, S; Lirman, D	Citizen science benefits coral reef restoration activities	Coral reefs, Acropora, Recovery, Citizen science, Restoration, Conservation	University of Miami	2017	10.1016/j.jnc.2017.09.001	Biodiversity & Conservation; Environmental Sciences & Ecology	2022-06-20	WOS:000415271600010
Villanueva, RD; Edwards, AJ; Bell, JD	Enhancement of Grazing Gastropod Populations as a Coral Reef Restoration Tool: Predation Effects and Related Applied Implications	coral recruitment, coral reef restoration, coral transplantation, grazing, herbivore predation, trochus	University of the Philippines System; University of the Philippines Diliman; Newcastle University - UK; CGIAR; Worldfish	2010	10.1111/j.1526-100X.2010.00742.x	Environmental Sciences & Ecology	2022-06-20	WOS:000283718000004
Obolski, U; Hadany, L; Abelson, A	Potential contribution of fish restocking to the recovery of deteriorated coral reefs: an alternative restoration method?	Restoration, Ecological modeling, Grazing, Coral reefs, Stock enhancement	Tel Aviv University; Tel Aviv University	2016	10.7717/peerj.1732	Science & Technology - Other Topics	2022-06-20	WOS:000371661900006
Ladd, MC; Burkepile, DE; Shantz, AA	Near-term impacts of coral restoration on target species, coral reef community structure, and ecological processes	Acropora cervicornis, coral reef, coral restoration, corallivory, ecological processes, herbivory	University of California System; University of California Santa Barbara; University of California System; University of California Santa Barbara; Pennsylvania Commonwealth System of Higher Education (PCSHE); Pennsylvania State University	2019	10.1111/rec.12939	Environmental Sciences & Ecology	2022-06-20	WOS:000484997000030
Tortolero-Langarica, JJA; Rodriguez-Troncoso, AP; Cupul-Magana, AL; Alarcon-Ortega, LC; Santiago-Valentin, JD	Accelerated recovery of calcium carbonate production in coral reefs using low-tech ecological restoration	Coral restoration, Coral growth, Eastern tropical Pacific, Branching corals, Carbonate budgets	Universidad de Guadalajara; Universidad Nacional Autonoma de Mexico	2019	10.1016/j.ecoleng.2019.01.002	Environmental Sciences & Ecology; Engineering	2022-06-20	WOS:000456717800011
Goergen, EA; Ostroff, Z; Gilliam, DS	Genotype and attachment technique influence the growth and survival of line nursery corals	coral gardening, coral restoration, floating nursery, threatened species	Nova Southeastern University	2018	10.1111/rec.12545	Environmental Sciences & Ecology	2022-06-20	WOS:000438220000005
Schill, SR; Asner, GP; McNulty, VP; Pollock, FJ; Croquer, A; Vaughn, NR; Escovar-Fadul, X; Raber, G; Shaver, E	Site Selection for Coral Reef Restoration Using Airborne Imaging Spectroscopy	reef restoration, Caribbean, remote sensing, coral survival, imaging spectroscopy, suitability modeling, coral outplanting	Arizona State University; Arizona State University-Tempe; University of Southern Mississippi	2021	10.3389/fmars.2021.698004	Environmental Sciences & Ecology; Marine & Freshwater Biology	2022-06-20	WOS:000683306500001
Caruso, C; Hughes, K; Drury, C	Selecting Heat-Tolerant Corals for Proactive Reef Restoration	coral bleaching, thermal tolerance, selective propagation, climate change, restoration	University of Hawaii System; University of Hawaii Manoa	2021	10.3389/fmars.2021.632027	Environmental Sciences & Ecology; Marine & Freshwater Biology	2022-06-20	WOS:000658395000001
Epstein, N; Bak, RPM; Rinkevich, B	Strategies for gardening denuded coral reef areas: The applicability of using different types of coral material for reef restoration	Eilat, in situ mariculture, coral nursery, recreational activities, reef restoration, Stylophora pistillata	League of European Research Universities - LERU; University of Amsterdam; League of European Research Universities - LERU; Utrecht University; Royal Netherlands Institute for Sea Research (NIOZ)	2001	10.1046/j.1526-100X.2001.94012.x	Environmental Sciences & Ecology	2022-06-20	WOS:000172926500012
Abelson, A; Obolski, U; Regoniel, P; Hadeny, L	Restocking Herbivorous Fish Populations As a Social-Ecological Restoration Tool in Coral Reefs	coral reefs, social-ecological restoration, fish restocking, biomanipulation, ecosystem management	Tel Aviv University; Tel Aviv University	2016	10.3389/fmars.2016.00138	Environmental Sciences & Ecology; Marine & Freshwater Biology	2022-06-20	WOS:000457358000135
Epstein, N; Bak, RPM; Rinkevich, B	Applying forest restoration principles to coral reef rehahilitation	coral mariculture, forest restoration, in situ nurseries, reef management, reef restoration, silviculture		2003	10.1002/aqc.558	Environmental Sciences & Ecology; Marine & Freshwater Biology; Water Resources	2022-06-20	WOS:000185682400002
Unsworth, JD; Hesley, D; D'Alessandro, M; Lirman, D	Outplanting optimized: developing a more efficient coral attachment technique using Portland cement	Acropora cervicornis, citizen science, outplanting methods, Portland cement, restoration best practices	University of Miami	2021	10.1111/rec.13299	Environmental Sciences & Ecology	2022-06-20	WOS:000590180100001
Shelton, AJ; Richmond, RH	Watershed restoration as a tool for improving coral reef resilience against climate change and other human impacts	Watershed, Watershed restoration, Coral reefs, Sedimentation, Guam	University of Guam; University of Hawaii System; University of Hawaii Manoa	2016	10.1016/j.ecss.2016.06.027	Marine & Freshwater Biology; Oceanography	2022-06-20	WOS:000390965400016
Foo, SA; Asner, GP	Sea surface temperature in coral reef restoration outcomes	coral reef restoration, sea surface temperature, coral outplants, coral survival	Arizona State University; Arizona State University-Tempe	2020	10.1088/1748-9326/ab7dfa	Environmental Sciences & Ecology; Meteorology & Atmospheric Sciences	2022-06-20	WOS:000551751900001
Dehnert, I; Saponari, L; Isa, V; Seveso, D; Galli, P; Montano, S	Exploring the performance of mid-water lagoon nurseries for coral restoration in the Maldives	Acropora, coral gardening, coral reef, disease, growth rate, Magoodhoo, monitoring, survivorship	University of Milano-Bicocca		10.1111/rec.13600	Environmental Sciences & Ecology	2022-06-20	WOS:000722613800001
Harrison, PL; dela Cruz, DW; Cameron, KA; Cabaitan, PC	Increased Coral Larval Supply Enhances Recruitment for Coral and Fish Habitat Restoration	reef restoration, sexual reproduction, Acropora tenuis, larval settlement, coral recruitment, coral growth, survivorship, fish assemblages	Southern Cross University; University of the Philippines System; University of the Philippines Diliman	2021	10.3389/fmars.2021.750210	Environmental Sciences & Ecology; Marine & Freshwater Biology	2022-06-20	WOS:000730188900001
Montseny, M; Linares, C; Viladrich, N; Capdevila, P; Ambroso, S; Diaz, D; Gili, JM; Gori, A	A new large-scale and cost-effective restoration method for cold-water coral gardens	benthos, conservation evaluation, coral, fishing, new techniques, recovery	Consejo Superior de Investigaciones Cientificas (CSIC); CSIC - Centro Mediterraneo de Investigaciones Marinas y Ambientales (CMIMA); CSIC - Instituto de Ciencias del Mar (ICM); League of European Research Universities - LERU; University of Barcelona; League of European Research Universities - LERU; University of Oxford; Spanish Institute of Oceanography; University of Salento	2020	10.1002/aqc.3303	Environmental Sciences & Ecology; Marine & Freshwater Biology; Water Resources	2022-06-20	WOS:000519962800001
Halperin, AA; Chaves-Fonnegra, A; Gilliam, DS	Effects of excavating-sponge removal on coral growth	Cliona, excavating sponge, sponge-coral interaction, bioerosion, restoration, sponge removal	Nova Southeastern University	2016	10.1017/S0025315415001228	Marine & Freshwater Biology	2022-06-20	WOS:000371163700023
Page, CA; Muller, EM; Vaughan, DE	Microfragmenting for the successful restoration of slow growing massive corals	Coral reefs, Coral restoration, Microfragmenting, Orbicella faveolata, Montastrea cavernosa	Mote Marine Laboratory & Aquarium; Mote Marine Laboratory & Aquarium; Mote Marine Laboratory & Aquarium	2018	10.1016/j.ecoleng.2018.08.017	Environmental Sciences & Ecology; Engineering	2022-06-20	WOS:000446253500009
Suggett, DJ; Camp, EF; Edmondson, J; Bostrom-Einarsson, L; Ramler, V; Lohr, K; Patterson, JT	Optimizing return-on-effort for coral nursery and outplanting practices to aid restoration of the Great Barrier Reef	coral nursery, Great Barrier Reef, growth, reef restoration, return-on-effort, survivorship	University of Technology Sydney; James Cook University; State University System of Florida; University of Florida	2019	10.1111/rec.12916	Environmental Sciences & Ecology	2022-06-20	WOS:000468332300025
Forrester, GE; O'Connell-Rodwell, C; Baily, P; Forrester, LM; Giovannini, S; Harmon, L; Karis, R; Krumholz, J; Rodwell, T; Jarecki, L	Evaluating Methods for Transplanting Endangered Elkhorn Corals in the Virgin Islands	Acropora palmata, Caribbean coral reefs, elkhorn coral, endangered species, grassroots restoration, growth, reef rehabilitation, survival, transplanting methodology	University of Rhode Island; Stanford University; University of Rhode Island; University of Rhode Island	2011	10.1111/j.1526-100X.2010.00664.x	Environmental Sciences & Ecology	2022-06-20	WOS:000289893200002
Linan-Cabello, MA; Flores-Ramirez, LA; Laurel-Sandoval, MA; Mendoza, EG; Santiago, OS; Delgadillo-Nuno, MA	Acclimation in Pocillopora spp. during a coral restoration program in Carrizales Bay, Colima, Mexico	bleaching, CoralWatch, zooxanthellae, skeletal growth, coral health, restoration	Universidad de Colima; CICESE - Centro de Investigacion Cientifica y de Educacion Superior de Ensenada	2011	10.1080/10236244.2010.537440	Marine & Freshwater Biology	2022-06-20	WOS:000286828700006
Hagedorn, M; Carter, VL; Henley, EM; van Oppen, MJH; Hobbs, R; Spindler, RE	Producing Coral Offspring with Cryopreserved Sperm: A Tool for Coral Reef Restoration		Smithsonian Institution; Smithsonian National Zoological Park & Conservation Biology Institute; University of Hawaii System; Australian Institute of Marine Science; University of Melbourne	2017	10.1038/s41598-017-14644-x	Science & Technology - Other Topics	2022-06-20	WOS:000414231000033
Shaver, EC; McLeod, E; Hein, MY; Palumbi, SR; Quigley, K; Vardi, T; Mumby, PJ; Smith, D; Montoya-Maya, P; Muller, EM; Banaszak, AT; McLeod, IM; Wachenfeld, D	A roadmap to integrating resilience into the practice of coral reef restoration	climate change adaptation, coral bleaching, coral reefs, resilience, resilience-based management, restoration	Nature Conservancy; Stanford University; University of Queensland; Mars; Mote Marine Laboratory & Aquarium; Universidad Nacional Autonoma de Mexico; James Cook University		10.1111/gcb.16212	Biodiversity & Conservation; Environmental Sciences & Ecology	2022-06-20	WOS:000797559900001
Tagliafico, A; Rangel, S; Christidis, L; Kelaher, BP	A potential method for improving coral self-attachment	asexual reproduction, coral reefs, coral translocation, fragment orientation, Hydnophora rigida, reef restoration	Southern Cross University	2018	10.1111/rec.12698	Environmental Sciences & Ecology	2022-06-20	WOS:000449709700014
Henry, JA; O'Neil, KL; Pilnick, AR; Patterson, JT	Strategies for integrating sexually propagated corals into Caribbean reef restoration: experimental results and considerations	Coral outplanting, Acropora, Genetic diversity, Adaptive management, Threatened species	State University System of Florida; University of Florida; State University System of Florida; University of Florida		10.1007/s0038-021-02154-2	Marine & Freshwater Biology	2022-06-20	WOS:000673382600002
Zayasu, Y; Satoh, N; Shinzato, C	Genetic diversity of farmed and wild populations of the reef-building coral, Acropora tenuis	coral reefs, microsatellite, outplanting nursery corals, population genetics, reef restoration, transplantation	Okinawa Institute of Science & Technology Graduate University; University of Tokyo	2018	10.1111/rec.12687	Environmental Sciences & Ecology	2022-06-20	WOS:000449709700027
Albalawi, HI; Khan, ZN; Valle-Perez, AU; Kahin, KM; Hountondji, M; Alwazani, H; Schmidt-Roach, S; Bilalis, P; Aranda, M; Duarte, CM; Hauser, CAE	Sustainable and Eco-Friendly Coral Restoration through 3D Printing and Fabrication	coral restoration, eco-friendly process, coral microfragmentation, limestone 3D printing, additive manufacturing, photosensitive resin	King Abdullah University of Science & Technology; King Abdullah University of Science & Technology; King Abdullah University of Science & Technology; King Abdullah University of Science & Technology	2021	10.1021/acssuschemeng.1c04148	Chemistry; Science & Technology - Other Topics; Engineering	2022-06-20	WOS:000699846000018
Abelson, A	Artificial reefs vs coral transplantation as restoration tools for mitigating coral reef deterioration: Benefits, concerns, and proposed guidelines		Tel Aviv University	2006		Marine & Freshwater Biology; Oceanography	2022-06-20	WOS:000235074300013
Ligson, CA; Tabalanza, TD; Villanueva, RD; Cabaitan, PC	Feasibility of early outplanting of sexually propagated Acropora verweyi for coral reef restoration demonstrated in the Philippines	coral outplantation, Philippines, reef restoration, coral sexual propagation	University of the Philippines System; University of the Philippines Diliman	2020	10.1111/rec.13054	Environmental Sciences & Ecology	2022-06-20	WOS:000497279300001
Ng, CSL; Toh, TC; Chou, LM	Coral restoration in Singapore's sediment-challenged sea	Reef rehabilitation, Coastal management, Artificial reefs, Coral nurseries, Transplantation	National University of Singapore	2016	10.1016/j.rsma.2016.05.005	Environmental Sciences & Ecology; Marine & Freshwater Biology	2022-06-20	WOS:000414772000006
Chan, WY; Peplow, LM; Menendez, P; Hoffmann, AA; van Oppen, MJH	Interspecific Hybridization May Provide Novel Opportunities for Coral Reef Restoration	hybridization, restoration, coral reefs, climate change, Acropora, assisted evolution, genetic rescue, hybrid vigor	Australian Institute of Marine Science; University of Melbourne; University of Queensland; University of Melbourne	2018	10.3389/fmars.2018.00160	Environmental Sciences & Ecology; Marine & Freshwater Biology	2022-06-20	WOS:000457147000001
Guest, JR; Dizon, RM; Edwards, AJ; Franco, C; Gomez, ED	How Quickly do Fragments of Coral Self-Attach after Transplantation?	coral fragmentation, coral reef, coral transplantation, Philippines, reef restoration, self-attachment	National University of Singapore; University of the Philippines System; University of the Philippines Diliman; Newcastle University - UK	2011	10.1111/j.1526-100X.2009.00562.x	Environmental Sciences & Ecology	2022-06-20	WOS:000287932600011
Hein, MY; Vardi, T; Shaver, EC; Pioch, S; Bostrom-Einarsson, L; Ahmed, M; Grimsditch, G; McLeod, IM	Perspectives on the Use of Coral Reef Restoration as a Strategy to Support and Improve Reef Ecosystem Services	coral restoration, climate change, recommendations, intervention, efficiency, scalability	James Cook University; Nature Conservancy; Universite Paul-Valery; Lancaster University	2021	10.3389/fmars.2021.618303	Environmental Sciences & Ecology; Marine & Freshwater Biology	2022-06-20	WOS:000637057100001
Linden, B; Rinkevich, B	Creating stocks of young colonies from brooding coral larvae, amenable to active reef restoration	Brooder, Coral gardening, Coral reef restoration, Eilat, Planulae, Sexual recruits, Spat, Stylophora pistillata	League of European Research Universities - LERU; University of Amsterdam	2011	10.1016/j.jembe.2010.12.002	Environmental Sciences & Ecology; Marine & Freshwater Biology	2022-06-20	WOS:000288046200006
Lirman, D; Miller, MW	Modeling and monitoring tools to assess recovery status and convergence rates between restored and undisturbed coral reef habitats	assessment, convergence rates, coral restoration, monitoring, population modeling, Porites astreoides	University of Miami; National Oceanic Atmospheric Admin (NOAA) - USA	2003	10.1046/j.1526-100X.2003.rec0286.x	Environmental Sciences & Ecology	2022-06-20	WOS:000186531800006
Bowden-Kerby, A	Low-tech coral reef restoration methods modeled after natural fragmentation processes			2001		Marine & Freshwater Biology; Oceanography	2022-06-20	WOS:000172609000051
Henry, JA; O'Neil, KL; Pilnick, AR; Patterson, JT	Strategies for integrating sexually propagated corals into Caribbean reef restoration: experimental results and considerations	Coral outplanting, Acropora, Genetic diversity, Adaptive management, Threatened species	State University System of Florida; University of Florida; State University System of Florida; University of Florida	2021	10.1007/s00338-021-02154-2	Marine & Freshwater Biology	2022-06-20	WOS:000698962900026
Abrina, TAS; Bennett, J	Estimating the Recreational Benefits of Coral Restoration in Northwestern, Philippines	travel cost method, contingent behavior, coral restoration, larval enhancement	University of the Philippines System; University of the Philippines Diliman; Australian National University	2018		Environmental Sciences & Ecology	2022-06-20	WOS:000454670300011
Yang, QS; Zhang, WQ; Zhang, Y; Tang, XY; Ling, J; Zhang, YY; Dong, JD	Promoting larval settlement of coral Pocillopora damicornis by calcium	Coral larvae, Calcium, Settlement, Reef restoration, Pocillopora damicornis	Chinese Academy of Sciences; South China Sea Institute of Oceanology, CAS; Chinese Academy of Sciences; Chinese Academy of Sciences; Chinese Academy of Sciences; University of Chinese Academy of Sciences, CAS; Yantai University	2022	10.1007/s00338-021-02216-5	Marine & Freshwater Biology	2022-06-20	WOS:000741284500001
Nanajkar, M; De, K; Ingole, B	Coral reef restoration - A way forward to offset the coastal development impacts on Indian coral reefs	Coral reef, Sagarmala programme, Ecological engineering, Coral transplantation	Council of Scientific & Industrial Research (CSIR) - India; CSIR - National Institute of Oceanography (NIO); Goa University	2019	10.1016/j.marpolbul.2019.110504	Environmental Sciences & Ecology; Marine & Freshwater Biology	2022-06-20	WOS:000501387300015
McMurray, SE; Pawlik, JR	A Novel Technique for the Reattachment of Large Coral Reef Sponges	sponge coral reef remediation	University of North Carolina; University of North Carolina Wilmington	2009	10.1111/j.1526-100X.2008.00463.x	Environmental Sciences & Ecology	2022-06-20	WOS:000263911000004
Linden, B; Vermeij, MJA; Rinkevich, B	The coral settlement box: A simple device to produce coral stock from brooded coral larvae entirely in situ	Restoration, Coral, Planulae, Brooder, In situ, Coral gardening, Stock, Larvae, Active restoration	League of European Research Universities - LERU; University of Amsterdam	2019	10.1016/j.ecoleng.2019.04.012	Environmental Sciences & Ecology; Engineering	2022-06-20	WOS:000464952200014
Lamont, TAC; Williams, B; Chapuis, L; Prasetya, ME; Seraphim, MJ; Harding, HR; May, EB; Janetski, N; Jompa, J; Smith, DJ; Radford, AN; Simpson, SD	The sound of recovery: Coral reef restoration success is detectable in the soundscape	bioacoustics, coral reef, ecoacoustics, ecosystem monitoring, passive acoustic monitoring, restoration, soundscape	University of Exeter; Mars; University of London; University College London; University of West Scotland; University of Bristol; Universitas Hasanuddin; Universitas Hasanuddin; University of Essex	2022	10.1111/1365-2664.14089	Biodiversity & Conservation; Environmental Sciences & Ecology	2022-06-20	WOS:000727788800001
Kuffner, IB; Bartels, E; Stathakopoulos, A; Enochs, IC; Kolodziej, G; Toth, LT; Manzello, DP	Plasticity in skeletal characteristics of nursery-raised staghorn coral, Acropora cervicornis	Coral growth, Buoyant weight, Coral restoration, Calcification, Genotype effects, Coral nurseries	United States Department of the Interior; United States Geological Survey; Mote Marine Laboratory & Aquarium; National Oceanic Atmospheric Admin (NOAA) - USA; Atlantic Oceanographic & Meteorological Laboratory (AOML); University of Miami	2017	10.1007/s00338-017-1560-2	Marine & Freshwater Biology	2022-06-20	WOS:000406954100001
Villechanoux, J; Bierwirth, J; Mantas, TP; Cerrano, C	Testing Transplantation Techniques for the Red Coral Corallium rubrum	Octocorallia, Mediterranean Sea, mesophotic, red coral, transplantation, restoration	Ghent University; Marche Polytechnic University; Stazione Zoologica Anton Dohrn di Napoli	2022	10.3390/w14071071	Environmental Sciences & Ecology; Water Resources	2022-06-20	WOS:000781290700001
dela Cruz, DW; Villanueva, RD; Baria, MVB	Community-based, low-tech method of restoring a lost thicket of Acropora corals	Acropora, Bolinao, community-based coral restoration, low-tech coral restoration, Philippines	University of the Philippines System; University of the Philippines Diliman	2014	10.1093/icesjms/fst228	Fisheries; Marine & Freshwater Biology; Oceanography	2022-06-20	WOS:000343315900030
Montoya-Maya, PH; Smit, KP; Burt, AJ; Frias-Torres, S	Large-scale coral reef restoration could assist natural recovery in Seychelles, Indian Ocean	Reef recovery, coral transplantation, coral settlement, coral recruitment, Acroporidae, Pocilloporidae, Western Indian Ocean	Nelson Mandela University; Smithsonian Institution; Smithsonian National Museum of Natural History	2016	10.3897/natureconservation.16.8604	Biodiversity & Conservation	2022-06-20	WOS:000389654600001
Vandenberg, J; Humphries, A; Garcia-Quijanoa, C; Moore, A; Pollnac, R; Abdullah, S	Assessing Indicators and Limitations of Food Security Objectives in Coral Reef Restoration	development, sustainability, Indonesia, COREMAP, marine protected areas, coral reef restoration, food security	University of Rhode Island; University of Washington; University of Washington Seattle; University of Rhode Island; University of Rhode Island; University of Rhode Island	2021	10.4103/cs.cs_20_33	Biodiversity & Conservation; Environmental Sciences & Ecology	2022-06-20	WOS:000621017300008
Calle-Trivino, J; Rivera-Madrid, R; Leon-Pech, MG; Cortes-Useche, C; Sellares-Blasco, RI; Aguilar-Espinosa, M; Arias-Gonzalez, JE	Assessing and genotyping threatened staghorn coral Acropora cervicornis nurseries during restoration in southeast Dominican Republic	Acropora cervicornis, Coral reef restoration, Coral nurseries, Outplanted colonies, Threatened staghorn coral, Survival, Productivity, Growth, Genetic characterization, Dominican Republic	Instituto Politecnico Nacional - Mexico; Centro de Investigacion Cientifica de Yucatan; University of Rhode Island	2020	10.7717/peerj.8863	Science & Technology - Other Topics	2022-06-20	WOS:000526522100004
Fox, HE; Harris, JL; Darling, ES; Ahmadia, GN; Estradivari; Razak, TB	Rebuilding coral reefs: success (and failure) 16 years after low-cost, low-tech restoration	coral recruitment, coral reefs, Coral Triangle, destructive fishing, dynamite or blast fishing, rehabilitation	National Geographic Society; Wildlife Conservation Society; World Wildlife Fund; Universitas Padjadjaran	2019	10.1111/rec.12935	Environmental Sciences & Ecology	2022-06-20	WOS:000474808600020
Quigley, KM; Bay, LK; Willis, BL	Leveraging new knowledge of Symbiodinium community regulation in corals for conservation and reef restoration	Symbiodinium, Symbiosis, Coral reef, Adaptation, Coral bleaching	James Cook University; James Cook University; Australian Institute of Marine Science	2018	10.3354/meps12652	Environmental Sciences & Ecology; Marine & Freshwater Biology; Oceanography	2022-06-20	WOS:000441331700019
Suzuki, G; Okada, W; Yasutake, Y; Yamamoto, H; Tanita, I; Yamashita, H; Hayashibara, T; Komatsu, T; Kanyama, T; Inoue, M; Yamazaki, M	Enhancing coral larval supply and seedling production using a special bundle collection system coral larval cradle for large-scale coral restoration	Acropora, artificial reef, coral larvae collector, recruitment	Fisheries Research Agency - Japan; Ministry of Agriculture Forestry & Fisheries - Japan	2020	10.1111/rec.13178	Environmental Sciences & Ecology	2022-06-20	WOS:000537812400001
Abrina, TAS; Bennett, J	A benefit-cost comparison of varying scales and methods of coral reef restoration in the Philippines	Coral reefs, Benefit cost analysis, Scale effects, Choice modelling, Philippines	Australian National University	2021	10.1016/j.scitotenv.2021.149325	Environmental Sciences & Ecology	2022-06-20	WOS:000701743500009
Barton, JA; Bourne, DG; Humphrey, C; Hutson, KS	Parasites and coral-associated invertebrates that impact coral health	coral aquaculture, ornamental trade, pest management, reef restoration, symbiosis	James Cook University; Australian Institute of Marine Science	2020	10.1111/raq.12434	Fisheries	2022-06-20	WOS:000532527100001
Rodgers, KS; Lorance, K; Dona, AR; Stender, Y; Lager, C; Jokiel, PL	Effectiveness of coral relocation as a mitigation strategy in Kane'ohe Bay, Hawai'i	Coral reef, Dredging, Restoration, Hawai`i, Transplantation, Coral relocation	University of Hawaii System	2017	10.7717/peerj.3346	Science & Technology - Other Topics	2022-06-20	WOS:000401846200007
Henry, JA; Khattri, RB; Guingab-Cagmat, J; Merritt, ME; Garrett, TJ; Patterson, JT; Lohr, KE	Intraspecific variation in polar and nonpolar metabolite profiles of a threatened Caribbean coral	Coral restoration, Mass spectrometry, Metabolomics, Lipidomics, Acropora cervicornis, Coral reefs	State University System of Florida; University of Florida; State University System of Florida; University of Florida; State University System of Florida; University of Florida; National Oceanic Atmospheric Admin (NOAA) - USA; State University System of Florida; University of Florida	2021	10.1007/s11306-021-01808-0	Endocrinology & Metabolism	2022-06-20	WOS:000663329400001
Boch, CA; DeVogelaere, A; Burton, E; King, C; Lord, J; Lovera, C; Litvin, SY; Kuhnz, L; Barry, JP	Coral Translocation as a Method to Restore Impacted Deep-Sea Coral Communities	deep-sea coral restoration, Corallium sp., Lillipathes sp., Swiftia kofoidi, Keratoisis sp., Isidella tentaculum, Paragorgia arborea, Sibogagorgia cauliflora	Monterey Bay Aquarium Research Institute; National Oceanic Atmospheric Admin (NOAA) - USA	2019	10.3389/fmars.2019.00540	Environmental Sciences & Ecology; Marine & Freshwater Biology	2022-06-20	WOS:000482977800001
VanWynen, CM; Hightshoe, MV; Fogarty, ND; Dahlgren, CP; Gilliam, DS	Should Hybrids Be Used in Coral Nurseries? A Case Study Comparing Caribbean Acropora spp. and Their Hybrid in the Bahamas	Acropora, hybrid, coral restoration, coral nursery, Caribbean	Nova Southeastern University; University of North Carolina; University of North Carolina Wilmington	2021	10.3389/fmars.2021.669966	Environmental Sciences & Ecology; Marine & Freshwater Biology	2022-06-20	WOS:000692563700001
Huntington, BE; Miller, MW	Location-Specific Metrics for Rapidly Estimating the Abundance and Condition of the Threatened Coral Acropora cervicornis	coral reef restoration, monitoring, percent cover, staghorn coral, total linear extension	National Oceanic Atmospheric Admin (NOAA) - USA	2014	10.1111/rec.12057	Environmental Sciences & Ecology	2022-06-20	WOS:000336842500007
Villanueva, RD; Baria, MVB; dela Cruz, DW	Growth and survivorship of juvenile corals outplanted to degraded reef areas in Bolinao-Anda Reef Complex, Philippines	Coral reef restoration, coral outplantation, Acropora valida, coral spat, coral reproduction	University of the Philippines System; University of the Philippines Diliman	2012	10.1080/17451000.2012.682582	Environmental Sciences & Ecology; Marine & Freshwater Biology	2022-06-20	WOS:000308101200008
Shefy, D; Shashar, N; Rinkevich, B	Exploring Traits of Engineered Coral Entities to be Employed in Reef Restoration	coral chimerism, growth rates, survival, genetic homogenous, ecological engineering, active restoration, climate change, costs and benefits, nursery, coral transplantation	Ben Gurion University	2020	10.3390/jmse8121038	Engineering; Oceanography	2022-06-20	WOS:000602182600001
Zayasu, Y; Takeuchi, T; Nagata, T; Kanai, M; Fujie, M; Kawamitsu, M; Chinen, W; Shinzato, C; Satoh, N	Genome-wide SNP genotyping reveals hidden population structure of an acroporid species at a subtropical coral island: Implications for coral restoration	biogeography, conservation genetics, corals, genetic diversity, MIG-seq, population genetic structure, SNPs	Okinawa Institute of Science & Technology Graduate University; Okinawa Institute of Science & Technology Graduate University; University of Tokyo	2021	10.1002/aqc.3626	Environmental Sciences & Ecology; Marine & Freshwater Biology; Water Resources	2022-06-20	WOS:000663945300001
Oladi, M; Ghazilou, A; Rouzbehani, S; Polgardani, NZ; Kor, K; Ershadifar, H	Photographic application of the Coral Health Chart in turbid environments: The efficiency of image enhancement and restoration methods	Coral Health Chart, Image enhancement, Pseudo-coloring, Histogram equalization, Retinex, Turbidity	Shahid Beheshti University; Tarbiat Modares University	2022	10.1016/j.jembe.2021.151676	Environmental Sciences & Ecology; Marine & Freshwater Biology	2022-06-20	WOS:000744247600003
Milon, JW; Dodge, RE	Applying habitat equivalency analysis for coral reef damage assessment and restoration		State University System of Florida; University of Central Florida; Nova Southeastern University	2001		Marine & Freshwater Biology; Oceanography	2022-06-20	WOS:000172609000055
Cooper, WT; Lirman, D; VanGroningen, MP; Parkinson, JE; Herlan, J; McManus, JW	Assessing techniques to enhance early post-settlement survival of corals in situ for reef restoration		University of Miami; Florida Fish & Wildlife Conservation Commission; Pennsylvania Commonwealth System of Higher Education (PCSHE); Pennsylvania State University; Pennsylvania State University - University Park	2014	10.5343/bms.2013.1020	Marine & Freshwater Biology; Oceanography	2022-06-20	WOS:000334975900008
Wee, SYC; Sam, SQ; Sim, WT; Ng, CSL; Taira, D; Afiq-Rosli, L; Kikuzawa, YP; Toh, TC; Chou, LM	The role of in situ coral nurseries in supporting mobile invertebrate epifauna	Reef restoration, Coral mariculture, Asexual propagation, Coral dwellers, Singapore	National University of Singapore; National University of Singapore; National University of Singapore	2019	10.1016/j.jnc.2019.125710	Biodiversity & Conservation; Environmental Sciences & Ecology	2022-06-20	WOS:000484052000013
Frias-Torres, S; van de Geer, C	Testing animal-assisted cleaning prior to transplantation in coral reef restoration	Barnacle, Biofouling, Coral gardening, Indian ocean, Nursery, Seychelles, Transplantation, Biomimicry, Cleaning station	Smithsonian Institution; Smithsonian National Museum of Natural History	2015	10.7717/peerj.1287	Science & Technology - Other Topics	2022-06-20	WOS:000364328000009
Montseny, M; Linares, C; Viladrich, N; Biel, M; Gracias, N; Baena, P; Quintanilla, E; Ambroso, S; Grinyo, J; Santin, A; Salazar, J; Carreras, M; Palomeras, N; Magi, L; Vallicrosa, G; Gili, JM; Gori, A	Involving fishers in scaling up the restoration of cold-water coral gardens on the Mediterranean continental shelf	Cold-water coral gardens, Ecological active restoration, Large scale, Continental shelf, Fishers involvement	Consejo Superior de Investigaciones Cientificas (CSIC); CSIC - Centro Mediterraneo de Investigaciones Marinas y Ambientales (CMIMA); CSIC - Instituto de Ciencias del Mar (ICM); League of European Research Universities - LERU; University of Barcelona; Universitat de Girona	2021	10.1016/j.biocon.2021.109301	Biodiversity & Conservation; Environmental Sciences & Ecology	2022-06-20	WOS:000703199600001
Moore, A	We've never seen anything like it: Witnessing coral death and resurrection	coral restoration, witnessing tools, corporate social responsibility, Indonesia, Bahamas, materialization	University of Rhode Island	2021	10.1086/716237	Anthropology	2022-06-20	WOS:000757161100007
Golomb, D; Shashar, N; Rinkevich, B	Coral carpets- a novel ecological engineering tool aimed at constructing coral communities on soft sand bottoms	Coral sod, Coral nursery, Ecological engineering, Gardening, Growth, Reef restoration, Recruitment, Reproduction, Survival, Water velocity	Ben Gurion University	2020	10.1016/j.ecoleng.2020.105743	Environmental Sciences & Ecology; Engineering	2022-06-20	WOS:000522661400003
Yeemin, T; Sutthacheep, M; Pettongma, R	Coral reef restoration projects in Thailand		Ramkhamhaeng University	2006	10.1016/j.ocecoaman.2006.06.002	Oceanography; Water Resources	2022-06-20	WOS:000241395900004
Lirman, D; Thyberg, T; Herlan, J; Hill, C; Young-Lahiff, C; Schopmeyer, S; Huntington, B; Santos, R; Drury, C	Propagation of the threatened staghorn coral Acropora cervicornis: methods to minimize the impacts of fragment collection and maximize production	Acropora cervicornis, Coral gardening, Propagation, Fragmentation	University of Miami	2010	10.1007/s00338-010-0621-6	Marine & Freshwater Biology	2022-06-20	WOS:000280225200023
Henry, JA; O'Neil, KL; Patterson, JT	Native Herbivores Improve Sexual Propagation of Threatened Staghorn Coral Acropora cervicornis	coral restoration, herbivory, aquaculture, coral reef, threatened species	State University System of Florida; University of Florida	2019	10.3389/fmars.2019.00713	Environmental Sciences & Ecology; Marine & Freshwater Biology	2022-06-20	WOS:000497727100001
Leonard, C; Hedouin, L; Lacorne, MC; Dalle, J; Lapinski, M; Blanc, P; Nugues, MM	Performance of innovative materials as recruitment substrates for coral restoration	algae, artificial reef, benthos, competition, Pocillopora, settlement, South Pacific, 3D printing	Centre National de la Recherche Scientifique (CNRS); CNRS - Institute of Ecology & Environment (INEE); Centre National de la Recherche Scientifique (CNRS); CNRS - Institute of Ecology & Environment (INEE); Universite Perpignan Via Domitia		10.1111/rec.13625	Environmental Sciences & Ecology	2022-06-20	WOS:000762125900001
Garrison, VH; Ward, G	Transplantation of storm-generated coral fragments to enhance Caribbean coral reefs: A successful method but not a solution	Acropora cervicornis, A. palmata, coral mortality, Porites porites, reef restoration, coral transplantation	United States Department of the Interior; United States Geological Survey; Florida Fish & Wildlife Conservation Commission	2012		Life Sciences & Biomedicine - Other Topics	2022-06-20	WOS:000322431600006
Forrester, GE; Chan, M; Conetta, D; Dauksis, R; Nickles, K; Siravo, A	Comparing the Efficiency of Nursery and Direct Transplanting Methods for Restoring Endangered Corals	Acropora, cost-benefit, growth, staghorn coral, survival, tissue production	University of Rhode Island; University of Alaska System; University of Alaska Fairbanks; California State University System; California State University Northridge; University of Rhode Island	2019	10.3368/er.37.2.81	Environmental Sciences & Ecology	2022-06-20	WOS:000467981600006
Dehnert, I; Saponari, L; Galli, P; Montano, S	Comparing different farming habitats for mid-water rope nurseries to advance coral restoration efforts in the Maldives	Acropora, Coral gardening, Coral growth rate, Corallivory, Coral reef, Monitoring, Mutualism, Pocillopora, Rehabilitation, Survivorship	University of Milano-Bicocca	2022	10.7717/peerj.12874	Science & Technology - Other Topics	2022-06-20	WOS:000766803900005
Suzuki, G	Optimization of a spawning-induction protocol for the prediction of natural coral spawning	Acroporid, Hydrogen peroxide, Mass spawning, Stock enhancement, Gamete collection, Coral restoration	Fisheries Research Agency - Japan	2020	10.1007/s12562-020-01425-1	Fisheries	2022-06-20	WOS:000537338600001
Platz, MC; Takeshita, Y; Bartels, E; Arias, ME	Evaluating the potential for autonomous measurements of net community production and calcification as a tool for monitoring coral restoration	Florida Reef Tract, Ecosystem metabolism, Acropora cervicornis, Benthic ecosystem and acidification measurement system	State University System of Florida; University of South Florida; Monterey Bay Aquarium Research Institute	2020	10.1016/j.ecoleng.2020.106042	Environmental Sciences & Ecology; Engineering	2022-06-20	WOS:000596366500012
O'Donnell, KE; Lohr, KE; Bartels, E; Patterson, JT	Evaluation of staghorn coral (Acropora cervicornis, Lamarck 1816) production techniques in an ocean-based nursery with consideration of coral genotype	Scleractinia, Coral gardening, Aquaculture, Florida Reef Tract, Asexual reproduction	State University System of Florida; University of Florida; Mote Marine Laboratory & Aquarium	2017	10.1016/j.jembe.2016.11.013	Environmental Sciences & Ecology; Marine & Freshwater Biology	2022-06-20	WOS:000392999900006
Bright, AJ; Miller, MW; Bourque, AS	Tracking growth and survival of rescued boulder corals	coral rehabilitation, disease, reattachment, restoration, vessel grounding	University of Miami; National Oceanic Atmospheric Admin (NOAA) - USA; United States Department of the Interior	2016	10.1111/rec.12348	Environmental Sciences & Ecology	2022-06-20	WOS:000383719700004
Roeroe, KA; Yap, M; Okamoto, M	Development of new assessment methods for Acropora coral recruitment using coral settlement devices and holes of marine block	Coral recruitment, Early recruitment, Recruitment, Acropora corals, Coral settlement device, Marine block	Universitas Sam Ratulangi; Research Institute for Humanity & Nature (RIHN); Tokyo University of Marine Science & Technology	2013	10.1007/s12562-013-0632-7	Fisheries	2022-06-20	WOS:000322008300009
Schopmeyer, SA; Lirman, D; Bartels, E; Gilliam, DS; Goergen, EA; Griffin, SP; Johnson, ME; Lustic, C; Maxwell, K; Walter, CS	Regional restoration benchmarks for Acropora cervicornis	Acropora cervicornis, Restoration, Species recovery, Survival, Productivity, Growth	University of Miami; Mote Marine Laboratory & Aquarium; Nova Southeastern University; National Oceanic Atmospheric Admin (NOAA) - USA; Florida Fish & Wildlife Conservation Commission	2017	10.1007/s00338-017-1596-3	Marine & Freshwater Biology	2022-06-20	WOS:000415691300004
Sellares-Blasco, RI; Villalpando, MF; Guendulain-Garcia, SD; Croquer, A	Assisted Coral Reproduction in the Dominican Republic: A Successful Story to Replicate in the Caribbean	coral&nbsp, restoration&nbsp, coral&nbsp, reefs, sexual&nbsp, propagation, coral&nbsp, rearing, science-based solutions, Dominican&nbsp, Republic	Universidad Autonoma Metropolitana - Mexico; Simon Bolivar University	2021	10.3389/fmars.2021.669505	Environmental Sciences & Ecology; Marine & Freshwater Biology	2022-06-20	WOS:000683287600001
Ammar, MSA; Amin, EM; Gundacker, D; Mueller, WEG	One rational strategy for restoration of coral reefs: Application of molecular biological tools to select sites for rehabilitation by asexual recruits	coral reef, transplantation, rehabilitation, recruits, Hurghada, Red Sea	Johannes Gutenberg University of Mainz; Egyptian Knowledge Bank (EKB); National Institute of Oceanography & Fisheries (NIOF); Egyptian Knowledge Bank (EKB); National Institute of Oceanography & Fisheries (NIOF)	2000	10.1016/S0025-326X(00)00030-8	Environmental Sciences & Ecology; Marine & Freshwater Biology	2022-06-20	WOS:000088616800015
Bayraktarov, E; Banaszak, AT; Maya, PM; Kleypas, J; Arias-Gonzalez, JE; Blanco, M; Calle-Trivino, J; Charuvi, N; Cortes-Useche, C; Galvan, V; Salgado, MAG; Gnecco, M; Guendulain-Garcia, SD; Delgado, EAH; Moraga, JAM; Maya, MF; Quiroz, SM; Cervantes, SM; Morikawa, M; Nava, G; Pizarro, V; Sellares-Blasco, RI; Ramos, SES; Cubero, TV; Villalpando, MF; Frias-Torres, S	Coral reef restoration efforts in Latin American countries and territories		University of Queensland; Universidad Nacional Autonoma de Mexico; Instituto Politecnico Nacional - Mexico; University of Puerto Rico; University of Puerto Rico Rio Piedras; University of Puerto Rico; University of Puerto Rico Rio Piedras; Smithsonian Institution	2020	10.1371/journal.pone.0228477	Science & Technology - Other Topics	2022-06-20	WOS:000560393300050
Miller, MW; Colburn, PJ; Pontes, E; Williams, DE; Bright, AJ; Serrano, XM; Peters, EC	Genotypic variation in disease susceptibility among cultured stocks of elkhorn and staghorn corals	Florida Keys, Coral nursery, Restoration, Disease resistance, Acropora cervicornis, Challenge assay, Acropora palmata	National Oceanic Atmospheric Admin (NOAA) - USA; University of Miami; National Oceanic Atmospheric Admin (NOAA) - USA; Atlantic Oceanographic & Meteorological Laboratory (AOML); George Mason University	2019	10.7717/peerj.6751	Science & Technology - Other Topics	2022-06-20	WOS:000463695300007
Horoszowski-Fridman, YB; Izhaki, I; Rinkevich, B	Engineering of coral reef larval supply through transplantation of nursery-farmed gravid colonies	Coral reef, Coral reproduction, Resilience, Restoration, Stylophora pistillata, Transplantation	University of Haifa	2011	10.1016/j.jembe.2011.01.005	Environmental Sciences & Ecology; Marine & Freshwater Biology	2022-06-20	WOS:000289388500009
Yap, HT	Local changes in community diversity after coral transplantation	Coral transplantation, Coral restoration, Biodiversity	University of the Philippines System; University of the Philippines Diliman	2009	10.3354/meps07650	Environmental Sciences & Ecology; Marine & Freshwater Biology; Oceanography	2022-06-20	WOS:000263227300005
Gouezo, M; Fabricius, K; Harrison, P; Golbuu, Y; Doropoulos, C	Optimizing coral reef recovery with context-specific management actions at prioritized reefs	Coral reef, Disturbance, Recovery, Prioritization, Novel, Hybrid, Context-specific management	Australian Institute of Marine Science; Southern Cross University; Commonwealth Scientific & Industrial Research Organisation (CSIRO)	2021	10.1016/j.jenvman.2021.113209	Environmental Sciences & Ecology	2022-06-20	WOS:000681108600006
Suzuki, G; Kai, S; Yamashita, H; Suzuki, K; Iehisa, Y; Hayashibara, T	Narrower grid structure of artificial reef enhances initial survival of in situ settled coral	Coral reefs, Acropora, Larval seeding, Restoration, Branching coral, Coastal fishery	Fisheries Research Agency - Japan	2011	10.1016/j.marpolbul.2011.08.050	Environmental Sciences & Ecology; Marine & Freshwater Biology	2022-06-20	WOS:000298520400041
Tagliafico, A; Rangel, S; Kelaher, B; Scheffers, S; Christidis, L	A new technique to increase polyp production in stony coral aquaculture using waste fragments without polyps	Duncanopsammia axifuga, Reef-building scleractinia, Branching coral, Aquarium trade, Whisker coral, Daisy coral	Southern Cross University	2018	10.1016/j.aquaculture.2017.09.021	Fisheries; Marine & Freshwater Biology	2022-06-20	WOS:000416741800039
Shafir, S; Van Rijn, J; Rinkevich, B	Coral nubbins as source material for coral biological research: A prospectus	assay, coral biology, ecotoxicology, nubbin	Hebrew University of Jerusalem	2006	10.1016/j.aquaculture.2006.05.026	Fisheries; Marine & Freshwater Biology	2022-06-20	WOS:000240559500047
Palomar, MJS; Yap, HT; Gomez, ED	Coral Transplant Survival Over 3 Years under Different Environmental Conditions at the Hundred Islands, Philippines	coral restoration, coral transplantation, reef rehabilitation	University of the Philippines System; University of the Philippines Diliman	2009		Agriculture	2022-06-20	WOS:000268105100003
GUZMAN, HM	RESTORATION OF CORAL REEFS IN PACIFIC COSTA-RICA			1991	10.1111/j.1523-1739.1991.tb00123.x	Biodiversity & Conservation; Environmental Sciences & Ecology	2022-06-20	WOS:A1991FM32500010
Forrester, GE; Ferguson, MA; O'Connell-Rodwell, CE; Jarecki, LL	Long-term survival and colony growth of Acropora palmata fragments transplanted by volunteers for restoration	coral reef, demography, Elkhorn coral, fragmentation, restoration	University of Rhode Island; University of Rhode Island; Stanford University	2014	10.1002/aqc.2374	Environmental Sciences & Ecology; Marine & Freshwater Biology; Water Resources	2022-06-20	WOS:000330802700009
Cabaitan, PC; Yap, HT; Gomez, ED	Performance of single versus mixed coral species for transplantation to restore degraded reefs	Acanthaster planci, coral restoration, diversity, Drupella, partial mortality, Pavona frondifera, Porites cylindrica, predation	University of the Philippines System; University of the Philippines Diliman; University of Queensland	2015	10.1111/rec.12205	Environmental Sciences & Ecology	2022-06-20	WOS:000358127300005
Fox, HE; Mous, PJ; Pet, JS; Muljadi, AH; Caldwell, RL	Experimental assessment of coral reef rehabilitation following blast fishing	coral reef recovery, Indonesian reefs, reef restoration	University of California System; University of California Berkeley; The Nature Conservancy Indonesia	2005	10.1111/j.1523-1739.2005.00261.x	Biodiversity & Conservation; Environmental Sciences & Ecology	2022-06-20	WOS:000226438600016
Macadam, A; Nowell, CJ; Quigley, K	Machine Learning for the Fast and Accurate Assessment of Fitness in Coral Early Life History	coral restoration, machine learning, pixel classification, benthic ecology, climate change, coral reproduction, coral settlement, coral fitness	Australian Institute of Marine Science; Monash University	2021	10.3390/rs13163173	Environmental Sciences & Ecology; Geology; Remote Sensing; Imaging Science & Photographic Technology	2022-06-20	WOS:000690244500001
Million, WC; O'Donnell, S; Bartels, E; Kenkel, CD	Colony-Level 3D Photogrammetry Reveals That Total Linear Extension and Initial Growth Do Not Scale With Complex Morphological Growth in the Branching Coral, Acropora cervicornis	coral, morphology, 3D photogrammetry, Acropora cervicornis, TLE, volume, surface area, allometry	University of Southern California; Mote Marine Laboratory & Aquarium	2021	10.3389/fmars.2021.646475	Environmental Sciences & Ecology; Marine & Freshwater Biology	2022-06-20	WOS:000642485400001
Le, D; Becken, S; Curnock, M	Gaining public engagement to restore coral reef ecosystems in the face of acute crisis	Coral restoration, Trust, Perceived benefits, Emotions, Public engagement, Human intervention	Griffith University; University of Surrey; Commonwealth Scientific & Industrial Research Organisation (CSIRO)	2022	10.1016/j.gloenvcha.2022.102513	Environmental Sciences & Ecology; Geography	2022-06-20	WOS:000793736800005
Chan, WY; Peplow, LM; van Oppen, MJH	Interspecific gamete compatibility and hybrid larval fitness in reef-building corals: Implications for coral reef restoration		Australian Institute of Marine Science; University of Melbourne	2019	10.1038/s41598-019-41190-5	Science & Technology - Other Topics	2022-06-20	WOS:000489327300009
Williamson, OM; Allen, CE; Williams, DE; Johnson, MW; Miller, MW; Baker, AC	Neighboring colonies influence uptake of thermotolerant endosymbionts in threatened Caribbean coral recruits	Coral, Symbiosis, Recruits, Symbiodiniaceae, Durusdinium trenchii, Orbicella faveolata	University of Miami; University of Miami; National Oceanic Atmospheric Admin (NOAA) - USA	2021	10.1007/s00338-021-02090-1	Marine & Freshwater Biology	2022-06-20	WOS:000644259100001
Marimuthu, N; Verma, AK; Kumar, JSY; Adhavan, D; Satyanarayana, C	Integrated Coastal Zone Management Project funded Coral restoration processes in the Gulf of Kachchh -A present scenario	Integrated Coastal Zone Management Project, Coral reefs, Coral status, Gulf of Kachchh, Coral transplantation	Zoological survey of India; Zoological survey of India	2018		Oceanography	2022-06-20	WOS:000428970000002
Neil, RC; Humphrey, C; Bourne, DG; Heyward, A	Co-culture with grazers can improve survival and growth of multiple coral species	Coral aquaculture, Co-culture, Reef restoration, Gastropod, Coral recruits	James Cook University; Australian Institute of Marine Science; James Cook University; Australian Institute of Marine Science; University of Western Australia	2021	10.1016/j.aquaculture.2021.737095	Fisheries; Marine & Freshwater Biology	2022-06-20	WOS:000685114900010
Henley, EM; Bouwmeester, J; Jury, CP; Toonen, RJ; Quinn, M; Lager, CVA; Hagedorn, M	Growth and survival among Hawaiian corals outplanted from tanks to an ocean nursery are driven by individual genotype and species differences rather than preconditioning to thermal stress	Resilience, Coral nursery, Assisted evolution, Coral tree, Coral farm, Adaptive potential, Acclimatization, Bleaching, Acropora, Reef restoration	Smithsonian Institution; Smithsonian National Zoological Park & Conservation Biology Institute; University of Hawaii System; University of Hawaii Manoa	2022	10.7717/peerj.13112	Science & Technology - Other Topics	2022-06-20	WOS:000777565600001
Rinkevich, B	The Active Reef Restoration Toolbox is a Vehicle for Coral Resilience and Adaptation in a Changing World	climate change, reef restoration, gardening, ecological engineering, assisted migration/colonization, assisted genetics/evolution, assisted microbiome, epigenetics, chimerism		2019	10.3390/jmse7070201	Engineering; Oceanography	2022-06-20	WOS:000478581900009
Liu, CC; Cheng, SH; Lin, SJ	Illuminating the dark depths inside coral	3D imaging, cellular hypoxia, coral, light sheet fluorescence microscopy, Symbiodiniaceae, tissue clearing	Xiamen University; City University of Hong Kong; University of Connecticut	2020	10.1111/cmi.13122	Cell Biology; Microbiology	2022-06-20	WOS:000493344600001
Rachmilovitz, EN; Rinkevich, B	Tiling the reef - Exploring the first step of an ecological engineering tool that may promote phase-shift reversals in coral reefs	Coral nursery, Isogeneic fusion, Eilat, Gardening, Nubbins, Reef restoration, Turf algae	University of Haifa	2017	10.1016/j.ecoleng.2017.04.038	Environmental Sciences & Ecology; Engineering	2022-06-20	WOS:000404305300017
Lindahl, U	Coral reef rehabilitation through transplantation of staghorn corals: effects of artificial stabilization and mechanical damages	coral reef rehabilitation, coral transplantation, coral growth, Acropora muricata, Acropora vaughani		2003	10.1007/s00338-003-0305-6	Marine & Freshwater Biology	2022-06-20	WOS:000185688300003
van Woesik, R; Banister, RB; Bartels, E; Gilliam, DS; Goergen, EA; Lustic, C; Maxwell, K; Moura, A; Muller, EM; Schopmeyer, S; Winters, RS; Lirman, D	Differential survival of nursery-reared Acropora cervicornis outplants along the Florida reef tract	Acropora cervicornis, coral reef, coral restoration, coral&#8208, colony size, corals, Florida, habitat, nursery&#8208, reared outplants, survival, threatened species	Florida Institute of Technology; Mote Marine Laboratory & Aquarium; Nova Southeastern University; Qatar University; Florida Fish & Wildlife Conservation Commission; Florida Fish & Wildlife Conservation Commission; University of Miami	2021	10.1111/rec.13302	Environmental Sciences & Ecology	2022-06-20	WOS:000584517900001
Petersen, D; Tollrian, R	Methods to enhance sexual recruitment for restoration of damaged reefs		League of European Research Universities - LERU; University of Munich	2001		Marine & Freshwater Biology; Oceanography	2022-06-20	WOS:000172609000056
Biggs, BC	Harnessing Natural Recovery Processes to Improve Restoration Outcomes: An Experimental Assessment of Sponge-Mediated Coral Reef Restoration		State University System of Florida; Florida State University	2013	10.1371/journal.pone.0064945	Science & Technology - Other Topics	2022-06-20	WOS:000319961900021
Vijayavel, K; Richmond, RH	The preparation of the rice coral Montipora capitata nubbins for application in coral-reef ecotoxicology	Corals, Coral cultivation, Ecotoxicology	University of Hawaii System; University of Hawaii Manoa	2012	10.1007/s10646-011-0846-3	Environmental Sciences & Ecology; Toxicology	2022-06-20	WOS:000302065400028
Wang, C; Zhang, H; Liu, H; Jian, SG; Yan, JH; Liu, N	Application of a trait-based species screening framework for vegetation restoration in a tropical coral island of China	functional restoration, Recover Plant Species Selection software platform, the maximum entropy model, trait-based species screening, tropical coral island	Chinese Academy of Sciences; South China Botanical Garden, CAS; Hainan University	2020	10.1111/1365-2435.13553	Environmental Sciences & Ecology	2022-06-20	WOS:000538684400006
Bayraktarov, E; Saunders, MI; Abdullah, S; Mills, M; Beher, J; Possingham, HP; Mumby, PJ; Lovelock, CE	The cost and feasibility of marine coastal restoration	cost, feasibility, marine coastal ecosystems, rehabilitation, restoration, success and failure, synthesis	University of Queensland; University of Queensland; University of Queensland; University of Queensland	2016	10.1890/15-1077	Environmental Sciences & Ecology	2022-06-20	WOS:000378092900008
Bongiorni, L; Giovanelli, D; Rinkevich, B; Pusceddu, A; Chou, LM; Danovaro, R	First step in the restoration of a highly degraded coral reef (Singapore) by in situ coral intensive farming	In situ-mariculture, Reef restoration, Nurseries, Degraded reefs	Marche Polytechnic University; National University of Singapore	2011	10.1016/j.aquaculture.2011.09.024	Fisheries; Marine & Freshwater Biology	2022-06-20	WOS:000302314800025
Ferse, SCA	Poor Performance of Corals Transplanted onto Substrates of Short Durability	Acropora, attachment, coral transplantation, mortality, Pocillopora, survival	Leibniz Zentrum fur Marine Tropenforschung (ZMT)	2010	10.1111/j.1526-100X.2010.00682.x	Environmental Sciences & Ecology	2022-06-20	WOS:000279670600001
Muniz-Anguiano, D; Verduzco-Zapata, M; Linan-Cabello, MA	Factors associated with response Pocillopora spp. (Anthozoa: Scleractinia) during a restoration process on the Mexican Pacific coast	Restoration, Pocillopora, calcareous algae, coral, oxidative stress	Universidad de Colima	2017	10.4067/S0718-19572017000200009	Marine & Freshwater Biology; Oceanography	2022-06-20	WOS:000410138500009
Ng, CSL; Toh, TC; Chou, LM	Artificial reefs as a reef restoration strategy in sediment-affected environments: Insights from long-term monitoring	benthos, biodiversity, coral, reef, restoration, sedimentation, urban development	National University of Singapore	2017	10.1002/aqc.2755	Environmental Sciences & Ecology; Marine & Freshwater Biology; Water Resources	2022-06-20	WOS:000413551100009
Benedetti, A; Bramanti, L; Tsounis, G; Faimali, M; Pavanello, G; Rossi, S; Gili, JM; Santangelo, G	Applying cathodically polarised substrata to the restoration of a high value coral	octocoral, Corallium rubrum, restoration ecology, larval settlement, artificial substrata, cathodic polarisation	Consiglio Nazionale delle Ricerche (CNR); Consejo Superior de Investigaciones Cientificas (CSIC); CSIC - Centro Mediterraneo de Investigaciones Marinas y Ambientales (CMIMA); CSIC - Instituto de Ciencias del Mar (ICM); University of Pisa; Consiglio Nazionale delle Ricerche (CNR); Istituto di Scienze Marine (ISMAR-CNR); Autonomous University of Barcelona	2011	10.1080/08927014.2011.604870	Biotechnology & Applied Microbiology; Marine & Freshwater Biology	2022-06-20	WOS:000294480100011
Hagedorn, M; Spindler, R; Daly, J	Cryopreservation as a Tool for Reef Restoration: 2019	Coral, Reef, Cryobiology, Cryobanking, Assisted reproduction, Invertebrate	Smithsonian Institution; Smithsonian National Zoological Park & Conservation Biology Institute; University of Hawaii System	2019	10.1007/978-3-030-23633-5_16	Biodiversity & Conservation; Reproductive Biology	2022-06-20	WOS:000514114400017
Mercado-Molina, AE; Ruiz-Diaz, CP; Sabat, AM	Demographics and dynamics of two restored populations of the threatened reef-building coral Acropora cervicornis	Acropora cervicornis, Coral transplantation, Coral reefs, Fragment stabilization, Reef restoration	University of Puerto Rico; University of Puerto Rico Medical Sciences Campus; University of Puerto Rico; University of Puerto Rico Rio Piedras	2015	10.1016/j.jnc.2015.01.001	Biodiversity & Conservation; Environmental Sciences & Ecology	2022-06-20	WOS:000353092800003
Ferse, SCA; Hein, MY; Rolfer, L	A survey of current trends and suggested future directions in coral transplantation for reef restoration		Leibniz Zentrum fur Marine Tropenforschung (ZMT); University of Bremen; James Cook University	2021	10.1371/journal.pone.0249966	Science & Technology - Other Topics	2022-06-20	WOS:000646400800002
Soong, K; Chen, TA	Coral transplantation: Regeneration and growth of Acropora fragments in a nursery	Acropora, coral, fragment, growth, nursery, regeneration, transplantation	National Sun Yat Sen University	2003	10.1046/j.1526-100X.2003.00100.x	Environmental Sciences & Ecology	2022-06-20	WOS:000181056700008
Levy, G; Shaish, L; Haim, A; Rinkevich, B	Mid-water rope nursery Testing design and performance of a novel reef restoration instrument	Coral reef restoration, Rope nursery, Gardening concept, Reef degradation, Large scale nursery	University of Haifa	2010	10.1016/j.ecoleng.2009.12.003	Environmental Sciences & Ecology; Engineering	2022-06-20	WOS:000276290400026
Suzuki, G; Arakaki, S; Suzuki, K; Iehisa, Y; Hayashibara, T	What is the optimal density of larval seeding in Acropora corals?	Coral restoration, Grid plate, Artificial reef, Larval supply, Recruitment	Fisheries Research Agency - Japan	2012	10.1007/s12562-012-0504-6	Fisheries	2022-06-20	WOS:000306123200006
Goergen, EA; Gilliam, DS	Outplanting technique, host genotype, and site affect the initial success of outplanted Acropora cervicornis	Coral nursery, Florida, Productivity, Coral Point Count, Propagation, Restoration	Nova Southeastern University	2018	10.7717/peerj.4433	Science & Technology - Other Topics	2022-06-20	WOS:000426523900006
Schlecker, L; Page, C; Matz, M; Wright, RM	Mechanisms and potential immune tradeoffs of accelerated coral growth induced by microfragmentation	Microfragmentation, Coral immunity, Growth and immunity, Immunity tradeoffs, Orbicella faveolata, Montastraea cavernosa, Innate immunity, Reef restoration, Coral genomics, Outplanting	Smith College; Mote Marine Laboratory & Aquarium; University of Texas System; University of Texas Austin	2022	10.7717/peerj.13158	Science & Technology - Other Topics	2022-06-20	WOS:000788498500004
Levy, N; Berman, O; Yuval, M; Loya, Y; Treibitz, T; Tarazi, E; Levy, O	Emerging 3D technologies for future reformation of coral reefs: Enhancing biodiversity using biomimetic structures based on designs by nature	Marine ecosystems, Restoration, Artificial reefs, 3D printing, 3D images, Environmental DNA	Bar Ilan University; Technion Israel Institute of Technology; University of Haifa; University of Haifa; Tel Aviv University	2022	10.1016/j.scitotenv.2022.154749	Environmental Sciences & Ecology	2022-06-20	WOS:000794872600004
Lohr, KE; Mcnab, AAC; Manfrino, C; Patterson, JT	Assessment of wild and restored staghorn coral Acropora cervicornis across three reef zones in the Cayman Islands	Coral, Restoration, Endangered species, Conservation, Caribbean Sea, Cayman Islands	State University System of Florida; University of Florida; Texas A&M University System	2017	10.1016/j.rsma.2016.11.003	Environmental Sciences & Ecology; Marine & Freshwater Biology	2022-06-20	WOS:000414772400001
Stewart-Sinclair, PJ; Klein, CJ; Bateman, IJ; Lovelock, CE	Spatial cost-benefit analysis of blue restoration and factors driving net benefits globally	coral reef, ecosystem services, mangrove, marine coastal restoration, natural capital, restoration cost, saltmarsh, seagrass, arrecife de coral, capital natural, costo de restauracion, manglar, marisma, pastos marinos, restauracion de costas marinas, servicios ambientales	University of Queensland; University of Queensland; University of Exeter	2021	10.1111/cobi.13742	Biodiversity & Conservation; Environmental Sciences & Ecology	2022-06-20	WOS:000661594400001
Tortolero-Langarica, JJA; Rodriguez-Troncoso, AP; Cupul-Magana, AL; Rinkevich, B	Micro-Fragmentation as an Effective and Applied Tool to Restore Remote Reefs in the Eastern Tropical Pacific	climate change, coral restoration, nubbins, coral growth, calcification rates, Pavona clavus, Pocillopora, marginal reef, Mexican Pacific	Universidad de Guadalajara	2020	10.3390/ijerph17186574	Environmental Sciences & Ecology; Public, Environmental & Occupational Health	2022-06-20	WOS:000582027000001
Rinkevich, B	Steps towards the evaluation of coral reef restoration by using small branch fragments			2000	10.1007/s002270000293	Marine & Freshwater Biology	2022-06-20	WOS:000088186100006
Quigley, KM; Marzonie, M; Ramsby, B; Abrego, D; Milton, G; van Oppen, MJH; Bay, LK	Variability in Fitness Trade-Offs Amongst Coral Juveniles With Mixed Genetic Backgrounds Held in the Wild	coral, bleaching, restoration, selective breeding, hybridisation, survival, reproduction	Australian Institute of Marine Science; James Cook University; Southern Cross University; University of Melbourne	2021	10.3389/fmars.2021.636177	Environmental Sciences & Ecology; Marine & Freshwater Biology	2022-06-20	WOS:000624520200001
Chamberland, VF; Petersen, D; Guest, JR; Petersen, U; Brittsan, M; Vermeij, MJA	New Seeding Approach Reduces Costs and Time to Outplant Sexually Propagated Corals for Reef Restoration		League of European Research Universities - LERU; University of Amsterdam; Newcastle University - UK	2017	10.1038/s41598-017-17555-z	Science & Technology - Other Topics	2022-06-20	WOS:000418644100035
Lundgren, P; Vera, JC; Peplow, L; Manel, S; van Oppen, MJH	Genotype - environment correlations in corals from the Great Barrier Reef	SNP, Pocillopora, Acropora, Coral, Transcriptome, Genotype-environment correlation	Australian Institute of Marine Science; Pennsylvania Commonwealth System of Higher Education (PCSHE); Pennsylvania State University; Pennsylvania State University - University Park; Institut de Recherche pour le Developpement (IRD); UDICE-French Research Universities; Aix-Marseille Universite	2013	10.1186/1471-2156-14-9	Genetics & Heredity	2022-06-20	WOS:000316200200001
Kikuzawa, YP; Toh, TC; Ng, CSL; Sam, SQ; Taira, D; Afiq-Rosli, L; Chou, LM	Quantifying growth in maricultured corals using photogrammetry	coral growth, coral mariculture, coral morphology, geometric formula, planar area	National University of Singapore	2018	10.1111/are.13683	Fisheries	2022-06-20	WOS:000431489200020
Musco, L; Prada, F; D'Anna, G; Galasso, NM; Pipitone, C; Vega Fernandez, T; Badalamenti, F	Turning casualty into opportunity: fragmenting dislodged colonies is effective for restoring reefs of a Mediterranean endemic coral	Recreational diving, Scleractinia, Mediterranean Sea, Coral nubbins, Bioconstructions, Transplant	Stazione Zoologica Anton Dohrn di Napoli; University of Bologna; Consiglio Nazionale delle Ricerche (CNR); L'Istituto per l'Ambiente Marino Costiero (IAMC-CNR)	2017	10.1016/j.ecoleng.2016.10.075	Environmental Sciences & Ecology; Engineering	2022-06-20	WOS:000390454300025
Quimpo, TJR; Cabaitan, PC; Hoey, AS	Detachment of Porites cylindrica nubbins by herbivorous fishes	coral nubbins, coral nurseries, coral restoration, incidental grazing, reef fishes	University of the Philippines System; University of the Philippines Diliman; James Cook University	2020	10.1111/rec.13091	Environmental Sciences & Ecology	2022-06-20	WOS:000517199600019
Barott, KL; Huffmyer, AS; Davidson, JM; Lenz, EA; Matsuda, SB; Hancock, JR; Innis, T; Drury, C; Putnam, HM; Gates, RD	Coral bleaching response is unaltered following acclimatization to reefs with distinct environmental conditions	climate change, coral bleaching, ocean warming, adaptive management, restoration	University of Pennsylvania; University of Hawaii System; University of Hawaii Manoa; University of Rhode Island; University of Hawaii System; University of Hawaii Manoa	2021	10.1073/pnas.2025435118	Science & Technology - Other Topics	2022-06-20	WOS:000659433500005
Miller, MW; Karazsia, J; Groves, CE; Griffin, S; Moore, T; Wilber, P; Gregg, K	Detecting sedimentation impacts to coral reefs resulting from dredging the Port of Miami, Florida USA	Coral, Dredging, Sedimentation, Coral reef, Coral disease, Impact assessment, Monitoring, Adaptive management	National Oceanic Atmospheric Admin (NOAA) - USA; National Oceanic Atmospheric Admin (NOAA) - USA; University of Miami; National Oceanic Atmospheric Admin (NOAA) - USA; National Oceanic Atmospheric Admin (NOAA) - USA	2016	10.7717/peerj.2711	Science & Technology - Other Topics	2022-06-20	WOS:000388425600006
Sautya, S; Gaikwad, S; De, KLY; Nanajkar, M; Pradhan, UK; Mohandass, C; Sahu, B	Translocation of intertidal corals in highly urbanized Mumbai seascape: A pragmatic management initiative towards ecosystem conservation	Coral restoration, Coastal development, Conservation, Arabian Sea, India	Council of Scientific & Industrial Research (CSIR) - India; CSIR - National Institute of Oceanography (NIO); Council of Scientific & Industrial Research (CSIR) - India; CSIR - National Institute of Oceanography (NIO)	2022	10.1016/j.ecoleng.2022.106666	Environmental Sciences & Ecology; Engineering	2022-06-20	WOS:000802084200003
Edwards, AJ; Clark, S	Coral transplantation: A useful management tool or misguided meddling?		Newcastle University - UK	1998		Environmental Sciences & Ecology; Marine & Freshwater Biology	2022-06-20	WOS:000082454300013
Miller, MW; Latijnhouwers, KRW; Bickel, A; Mendoza-Quiroz, S; Schick, M; Burton, K; Banaszak, AT	Settlement yields in large-scale in situ culture of Caribbean coral larvae for restoration	larval culture, sexual propagation, upscaling	Universidad Nacional Autonoma de Mexico	2022	10.1111/rec.13512	Environmental Sciences & Ecology	2022-06-20	WOS:000694040000001
Macia, S; Robinson, MP; Nalevanko, A	Experimental dispersal of recovering Diadema antillarum increases grazing intensity and reduces macroalgal abundance on a coral reef	Diadema antillarum, coral reef, grazing, competition, macroalgae, reef restoration, rugosity, buttress zone	Universita degli Studi di Bari Aldo Moro; University of Miami	2007	10.3354/meps06962	Environmental Sciences & Ecology; Marine & Freshwater Biology; Oceanography	2022-06-20	WOS:000251203500014
Gibbs, MT	Developing a regional-scale reef restoration activity for the tropics	Reef restoration, Restoration supply chains, Scaling up, Current practices, Reef rehabilitation, Climate change	Australian Institute of Marine Science	2021	10.1007/s10113-021-01843-6	Environmental Sciences & Ecology	2022-06-20	WOS:000704787200001
Nguyen, LT; Tran, PD; Nguyen, KQ	An effectiveness of artificial coral reefs in the restoration of marine living resources	Artificial coral reef, Marine resource restoration, Inshore fisheries, Coastal management, Protected area, Fish componence	Nha Trang University; Fisheries & Oceans Canada	2022	10.1016/j.rsma.2021.102143	Environmental Sciences & Ecology; Marine & Freshwater Biology	2022-06-20	WOS:000747624700017
Ferse, SCA; Nugues, MM; Romatzki, SBC; Kunzmann, A	Examining the Use of Mass Transplantation of Brooding and Spawning Corals to Support Natural Coral Recruitment in Sulawesi/Indonesia	Acropora, artificial reef, coral reefs, Indonesia, Isopora, Pocillopora, settlement, settlement cues, Sulawesi	Leibniz Zentrum fur Marine Tropenforschung (ZMT); Universite Perpignan Via Domitia; Universite Perpignan Via Domitia	2013	10.1111/rec.12004	Environmental Sciences & Ecology	2022-06-20	WOS:000330125700011
Cavasos, KE; Bhat, MG	Impact of risk perception on household willingness-to-pay to restock the threatened staghorn coral	Staghorn, Willingness-to-pay, Risk perception, Contingent valuation, Coral restoration	State University System of Florida; Florida International University	2020	10.1016/j.ocecoaman.2020.105244	Oceanography; Water Resources	2022-06-20	WOS:000541741600012
Wang, G; Dong, R; Xu, HM; Ding, DW	Dynamic simulation of tropical coral reef ecosystem being disturbed by multiple situations	coral reef ecosystem, system dynamics, situational disturbance, simulation	Liaoning Normal University; Beibu Gulf University; Chinese Academy of Sciences; South China Sea Institute of Oceanology, CAS	2021	10.1007/s13131-021-1779-1	Oceanography	2022-06-20	WOS:000711873300012
Bouwmeester, J; Daly, J; Henley, EM; Parenti, LR; Pitassy, DE; Hagedorn, M	Conservation of coral reef fishes: a field-hardy method to cryopreserve spermatogonial cells	Asterropteryx semipunctata, Collection protocol, Cryopreservation, Primordial germ cells, Testes, Vouchers	Smithsonian Institution; Smithsonian National Zoological Park & Conservation Biology Institute; Smithsonian Institution; Smithsonian National Museum of Natural History		10.1007/s00338-022-02268-1	Marine & Freshwater Biology	2022-06-20	WOS:000793042100002
Santavy, DL; Jackson, SK; Jessup, B; Gerritsen, J; Rogers, C; Fisher, WS; Weil, E; Szmant, A; Cuevas-Miranda, D; Walker, BK; Jeffrey, C; Bradley, P; Ballantine, D; Roberson, L; Ruiz-Torres, H; Todd, B; Smith, T; Clark, R; Diaz, E; Bauza-Ortega, J; Horstmann, C; Raimondo, S	A biological condition gradient for coral reefs in the US Caribbean Territories: Part I. Coral narrative rules	Coral reef condition, Biocriteria, Biological integrity, Biological Condition Gradient (BCG), Coral reef protection, Narrative rules	United States Environmental Protection Agency; United States Environmental Protection Agency; United States Department of the Interior; United States Geological Survey; University of Puerto Rico; University of Puerto Rico Mayaguez; University of North Carolina; University of North Carolina Wilmington; United States Environmental Protection Agency; Nova Southeastern University; Smithsonian Institu…	2022	10.1016/j.ecolind.2022.108805	Biodiversity & Conservation; Environmental Sciences & Ecology	2022-06-20	WOS:000792779100001
Chakravarti, LJ; van Oppen, MJH	Experimental Evolution in Coral Photosymbionts as a Tool to Increase Thermal Tolerance	Symbiodinium, adaptation, acclimation, symbiosis, ocean warming, climate change, assisted evolution	Australian Institute of Marine Science; Australian Institute of Marine Science; James Cook University; James Cook University; University of Melbourne	2018	10.3389/fmars.2018.00227	Environmental Sciences & Ecology; Marine & Freshwater Biology	2022-06-20	WOS:000457175200001
Hudson, JH; Franklin, EC	Structural stabilization of a large Montastrea Faveolata (Ellis and Solander, 1786) colony damaged by vessel impact	coral, Florida Keys, restoration methods, Montastrea faveolata	National Oceanic Atmospheric Admin (NOAA) - USA	2006		Biodiversity & Conservation	2022-06-20	WOS:000244503800012
Nakamura, R; Ando, W; Yamamoto, H; Kitano, M; Sato, A; Nakamura, M; Kayanne, H; Omori, M	Corals mass-cultured from eggs and transplanted as juveniles to their native, remote coral reef	Acropora, Sexual reproduction, Coral culture, Reef rehabilitation, Transplantation	University of Tokyo	2011	10.3354/meps09257	Environmental Sciences & Ecology; Marine & Freshwater Biology; Oceanography	2022-06-20	WOS:000294619800011
Nava, H; Figueroa-Camacho, AG	Rehabilitation of damaged reefs: Outcome of the use of recently broken coral fragments and healed coral fragments of pocilloporid corals on rocky boulders	coral reefs, coral transplants, coverage rehabilitation, transplant growth, transplant survival	Universidad Michoacana de San Nicolas de Hidalgo	2017	10.1111/maec.12456	Marine & Freshwater Biology	2022-06-20	WOS:000413483000006
Frys, C; St-Amand, A; Le Henaff, M; Figueiredo, J; Kuba, A; Walker, B; Lambrechts, J; Vallaeys, V; Vincent, D; Hanert, E	Fine-Scale Coral Connectivity Pathways in the Florida Reef Tract: Implications for Conservation and Restoration	Florida reef tract, coral connectivity, biophysical modeling, PageRank, community detection, reef management	University of Miami; National Oceanic Atmospheric Admin (NOAA) - USA; Nova Southeastern University	2020	10.3389/fmars.2020.00312	Environmental Sciences & Ecology; Marine & Freshwater Biology	2022-06-20	WOS:000530806900001
Cortes-Useche, C; Reyes-Gamboa, W; Cabrera-Perez, JL; Calle-Trivino, J; Ceron-Flores, A; Raigoza-Figueras, R; Yathiraj, R; Arias-Gonzalez, JE	Capture, Culture and Release of Postlarvae Fishes: Proof-of-Concept as a Tool Approach to Support Reef Management	active restoration, biodiversity, Caribbean, coral reef, fish restocking, recovery	Instituto Politecnico Nacional - Mexico	2021	10.3389/fmars.2021.718526	Environmental Sciences & Ecology; Marine & Freshwater Biology	2022-06-20	WOS:000706213700001
Papke, E; Wallace, B; Hamlyn, S; Nowicki, R	Differential Effects of Substrate Type and Genet on Growth of Microfragments of Acropora palmata	Acropora, substrate, genotype, coral restoration, microfragmentation, asexual propagation	Mote Marine Laboratory & Aquarium	2021	10.3389/fmars.2021.623963	Environmental Sciences & Ecology; Marine & Freshwater Biology	2022-06-20	WOS:000644402000001
O'Neil, KL; Serafin, RM; Patterson, JT; Craggs, JRK	Repeated ex situ Spawning in Two Highly Disease Susceptible Corals in the Family Meandrinidae	SCTLD, coral reproduction, coral conservation, spawning, Florida Reef Tract, aquarium, Dendrogyra, Meandrina	State University System of Florida; University of Florida; University of Derby	2021	10.3389/fmars.2021.669976	Environmental Sciences & Ecology; Marine & Freshwater Biology	2022-06-20	WOS:000651362100003
Muko, S; Iwasa, Y	Long-term effect of coral transplantation: Restoration goals and the choice of species	Species diversity, Endangered species, Space-limited growth, Metapopulation model	Nagasaki University; University of Ryukyus; Japan Science & Technology Agency (JST); Kyushu University	2011	10.1016/j.jtbi.2011.04.012	Life Sciences & Biomedicine - Other Topics; Mathematical & Computational Biology	2022-06-20	WOS:000291371100013
Prerna, R; Naidu, VS; Sukumaran, S; Gajbhiye, SN	Observed decadal changes in extent of mangroves and coral reefs in southern Gulf of Kachchh using principal component analysis and geo-spatial techniques: a case study	Mangroves, LISS IV, Coral reefs, Temporal change, PCA	Council of Scientific & Industrial Research (CSIR) - India; CSIR - National Institute of Oceanography (NIO)	2015	10.1007/s11852-015-0385-9	Biodiversity & Conservation; Environmental Sciences & Ecology; Marine & Freshwater Biology; Water Resources	2022-06-20	WOS:000357040100001
Devlin-Durante, MK; Baums, IB	Genome-wide survey of single-nucleotide polymorphisms reveals fine-scale population structure and signs of selection in the threatened Caribbean elkhorn coral, Acropora palrnata	Functional diversity, RAD-Tag SNP, Climate change, Restoration, Caribbean, Bottleneck, Microsatellite, Gene flow, Conservation, Coral	Pennsylvania Commonwealth System of Higher Education (PCSHE); Pennsylvania State University; Pennsylvania State University - University Park	2017	10.7717/peerj.4077	Science & Technology - Other Topics	2022-06-20	WOS:000416047200006
Selmoni, O; Rochat, E; Lecellier, G; Berteaux-Lecellier, V; Joost, S	Seascape genomics as a new tool to empower coral reef conservation strategies: An example on north-western Pacific Acropora digitifera	Acropora digitifera, climate change, conservation genomics, coral bleaching, coral reefs, local adaptation, Ryukyu Archipelago, seascape genomics	Ecole Polytechnique Federale de Lausanne; UDICE-French Research Universities; League of European Research Universities - LERU; Universite Paris Saclay; Universite de Versailles Saint-Quentin-En-Yvelines	2020	10.1111/eva.12944	Evolutionary Biology	2022-06-20	WOS:000520527700001
Miller, N; Maneval, P; Manfrino, C; Frazer, TK; Meyer, JL	Spatial distribution of microbial communities among colonies and genotypes in nursery-reared Acropora cervicornis	Acropora cervicornis, Microbiome, Coral microbiology, Coral restoration	State University System of Florida; University of Florida; State University System of Florida; University of Florida	2020	10.7717/peerj.9635	Science & Technology - Other Topics	2022-06-20	WOS:000562625500001
Konh, B; Parry, M	Design, Fabrication, Installation, and Population of a Novel Fiberglass Reinforced Plastic Coral Nursery Structure Off the South Shore of O'ahu, Hawaii	fiberglass reinforced plastic, underwater structure, manufacturing, coral nursery, coral rehabilitation, Hawaii, finite element analysis, whole colony	University of Hawaii System; University of Hawaii Manoa; National Oceanic Atmospheric Admin (NOAA) - USA	2019	10.3389/fmars.2019.00569	Environmental Sciences & Ecology; Marine & Freshwater Biology	2022-06-20	WOS:000488121300001
Maynard, N; Chateau, PA; Ribas-Deulofeu, L; Liou, JL	Using Internet Surveys to Estimate Visitors' Willingness to Pay for Coral Reef Conservation in the Kenting National Park, Taiwan	contingent valuation method, internet survey, coral reefs valuation, non-market value	National Sun Yat Sen University; Academia Sinica - Taiwan; Academia Sinica - Taiwan; National Taiwan Normal University; National Taiwan Normal University	2019	10.3390/w11071411	Environmental Sciences & Ecology; Water Resources	2022-06-20	WOS:000480632300096
Guest, JR; Baria, MV; Gomez, ED; Heyward, AJ; Edwards, AJ	Closing the circle: is it feasible to rehabilitate reefs with sexually propagated corals?	Coral reef, Reef rehabilitation, Larval rearing, Acropora, Philippines	University of New South Wales Sydney; Nanyang Technological University & National Institute of Education (NIE) Singapore; Nanyang Technological University; Newcastle University - UK; University of the Philippines System; University of the Philippines Diliman; Australian Institute of Marine Science; University of Western Australia	2014	10.1007/s00338-013-1114-1	Marine & Freshwater Biology	2022-06-20	WOS:000330965000006
Grosso-Becerra, MV; Mendoza-Quiroz, S; Maldonado, E; Banaszak, AT	Cryopreservation of sperm from the brain coral Diploria labyrinthiformis as a strategy to face the loss of corals in the Caribbean	Sperm cryopreservation, Repository, Cryo-banking, Coral restoration, Genetic diversity, Species rescue, Stony Coral Tissue Loss Disease (SCTLD)	Universidad Nacional Autonoma de Mexico	2021	10.1007/s00338-021-02098-7	Marine & Freshwater Biology	2022-06-20	WOS:000647565400001
Tortolero-Langarica, JJA; Cupul-Magana, AL; Rodriguez-Troncoso, AP	Restoration of a degraded coral reef using a natural remediation process: A case study from a Central Mexican Pacific National Park		Universidad de Guadalajara	2014	10.1016/j.ocecoaman.2014.04.020	Oceanography; Water Resources	2022-06-20	WOS:000339534800002
Jacob, C; Buffard, A; Pioch, S; Thorin, S	Marine ecosystem restoration and biodiversity offset	Restoration, Marine ecosystems, Mitigation hierarchy, Offsetting, Environmental impact assessments	UDICE-French Research Universities; PSL Research University Paris; Ecole Pratique des Hautes Etudes (EPHE); Institut Agro; Montpellier SupAgro; CIRAD; Centre National de la Recherche Scientifique (CNRS); Institut de Recherche pour le Developpement (IRD); Universite Paul-Valery; Universite de Montpellier	2018	10.1016/j.ecoleng.2017.09.007	Environmental Sciences & Ecology; Engineering	2022-06-20	WOS:000444614500062
Afiq-Rosli, L; Huang, DW; Toh, TC; Taira, D; Ng, CSL; Song, TC; Chou, LM	Maximising genetic diversity during coral transplantation from a highly impacted source reef	Reef restoration, Conservation genetics, Scleractinia, Intragenomic variation, Amplicon sequencing	National University of Singapore; National University of Singapore; National University of Singapore	2019	10.1007/s10592-019-01164-6	Biodiversity & Conservation; Genetics & Heredity	2022-06-20	WOS:000467689100017
Blackwood, JC; Hastings, A; Mumby, PJ	The effect of fishing on hysteresis in Caribbean coral reefs	Coral reefs, Resilience, Phase shifts, Hysteresis	University of Michigan System; University of Michigan; University of Michigan System; University of Michigan; University of California System; University of California Davis; University of Queensland; University of Queensland	2012	10.1007/s12080-010-0102-0	Environmental Sciences & Ecology	2022-06-20	WOS:000302291700010
Roelfsema, CM; Lyons, MB; Castro-Sanguino, C; Kovacs, EM; Callaghan, D; Wettle, M; Markey, K; Borrego-Acevedo, R; Tudman, P; Roe, M; Kennedy, EV; Gonzalez-Rivero, M; Murray, N; Phinn, SR	How Much Shallow Coral Habitat Is There on the Great Barrier Reef?	coral reef, Great Barrier Reef, geomorphic, benthic, habitat map, Sentinel-2	University of Queensland; University of Queensland; Australian Institute of Marine Science; University of Queensland	2021	10.3390/rs13214343	Environmental Sciences & Ecology; Geology; Remote Sensing; Imaging Science & Photographic Technology	2022-06-20	WOS:000719332100001
Hagedorn, M; Page, CA; O'Neil, KL; Flores, DM; Tichy, L; Conn, T; Chamberland, VF; Lager, C; Zuchowicz, N; Lohr, K; Blackburn, H; Vardi, T; Moore, J; Moore, T; Baums, IB; Vermeij, MJA; Marhaver, KL	Assisted gene flow using cryopreserved sperm in critically endangered coral	assisted gene flow, coral reproduction, cryopreservation, endangered species, Acropora palmata	Smithsonian Institution; Smithsonian National Zoological Park & Conservation Biology Institute; Mote Marine Laboratory & Aquarium; University of Bremen; Radboud University Nijmegen; Pennsylvania Commonwealth System of Higher Education (PCSHE); Pennsylvania State University; Pennsylvania State University - University Park; League of European Research Universities - LERU; University of Amsterdam; S…	2021	10.1073/pnas.2110559118	Science & Technology - Other Topics	2022-06-20	WOS:000702151600003
Shafir, S; Van Rijn, J; Rinkevich, B	Steps in the construction of underwater coral nursery, an essential component in reef restoration acts		Hebrew University of Jerusalem	2006	10.1007/s00227-005-0236-6	Marine & Freshwater Biology	2022-06-20	WOS:000238327200024
Horoszowski-Fridman, YB; Izhaki, I; Rinkevich, B	Long-term heightened larval production in nursery-bred coral transplants	Gardening approach, Reef rehabilitation, Coral nursery, Coral transplantation, Reproduction, Planulae output	University of Haifa	2020	10.1016/j.baae.2020.05.003	Environmental Sciences & Ecology	2022-06-20	WOS:000570896100002
Zayasu, Y; Suzuki, G	Comparisons of population density and genetic diversity in artificial and wild populations of an arborescent coral, Acropora yongei: implications for the efficacy of artificial spawning hotspots	artificial larval source, coral restoration, direct larval seeding, larval supply, microsatellite	Okinawa Institute of Science & Technology Graduate University; Fisheries Research Agency - Japan	2019	10.1111/rec.12857	Environmental Sciences & Ecology	2022-06-20	WOS:000461699300022
Mbije, NEJ; Spanier, E; Rinkevich, B	Testing the first phase of the 'gardening concept' as an applicable tool in restoring denuded reefs in Tanzania	Zanzibar, Mafia Island, Mid-water nurseries, Coral gardening	Sokoine University of Agriculture; University of Haifa; University of Haifa	2010	10.1016/j.ecoleng.2009.12.018	Environmental Sciences & Ecology; Engineering	2022-06-20	WOS:000277872800012
Tarazi, E; Parnas, H; Lotan, O; Zoabi, M; Oren, A; Josef, N; Shashar, N	Nature-Centered Design: How design can support science to explore ways to restore coral reefs	Nature-Centred Design, Coral 3D-printing, Design Thinking, Marine Biology	Technion Israel Institute of Technology; Ben Gurion University	2019	10.1080/14606925.2019.1594995	Art	2022-06-20	WOS:000470072200110
Baria-Rodriguez, MV; dela Cruz, DW; Dizon, RM; Yap, HT; Villanueva, RD	Performance and cost-effectiveness of sexually produced Acropora granulosa juveniles compared with asexually generated coral fragments in restoring degraded reef areas	Acropora granulosa, asexual propagation, coral restoration, cost analysis, reef degradation, sexual propagation	University of the Philippines System; University of the Philippines Diliman; Southern Cross University; University of the Philippines System; University of the Philippines Baguio	2019	10.1002/aqc.3132	Environmental Sciences & Ecology; Marine & Freshwater Biology; Water Resources	2022-06-20	WOS:000472569200004
Santavy, DL; Jackson, SK; Jessup, B; Horstmann, C; Rogers, C; Weil, E; Szmant, A; Miranda, DC; Walker, BK; Jeffrey, C; Ballantine, D; Fisher, WS; Clark, R; Torres, HR; Todd, B; Raimondo, S	A biological condition gradient for Caribbean coral reefs: Part II. Numeric rules using sessile benthic organisms	Coral reef condition, Biocriteria, Biological integrity, Biological Condition Gradient (BCG), Coral reef protection, numeric model	United States Environmental Protection Agency; United States Environmental Protection Agency; United States Department of the Interior; United States Geological Survey; University of Puerto Rico; University of Puerto Rico Mayaguez; University of North Carolina; University of North Carolina Wilmington; United States Environmental Protection Agency; Nova Southeastern University; Smithsonian Institu…	2022	10.1016/j.ecolind.2022.108576	Biodiversity & Conservation; Environmental Sciences & Ecology	2022-06-20	WOS:000761282000009
dela Cruz, DW; Harrison, PL	Enhancing coral recruitment through assisted mass settlement of cultured coral larvae		Southern Cross University; University of the Philippines System; University of the Philippines Diliman	2020	10.1371/journal.pone.0242847	Science & Technology - Other Topics	2022-06-20	WOS:000595863100013
Brito-Millan, M; Werner, BT; Sandin, SA; McNamara, DE	Influence of aggregation on benthic coral reef spatio-temporal dynamics	aggregation, coral-algae, time scales, transient dynamics, pattern formation, state space	University of California System; University of California San Diego; University of California System; University of California San Diego; University of San Diego; University of North Carolina; University of North Carolina Wilmington	2019	10.1098/rsos.181703	Science & Technology - Other Topics	2022-06-20	WOS:000465432900033
Cano, I; Sellares-Blasco, RI; Lefcheck, JS; Villalpando, MF; Croquer, A	Effects of herbivory by the urchin Diadema antillarum on early restoration success of the coral Acropora cervicornis in the central Caribbean	Dominican Republic, Growth rates, Herbivory, Living tissue, Outplant, Predation	Universidade da Coruna; Smithsonian Institution; Smithsonian Environmental Research Center; Simon Bolivar University	2021	10.1016/j.jembe.2021.151541	Environmental Sciences & Ecology; Marine & Freshwater Biology	2022-06-20	WOS:000645098600003
Cupul-Magana, AL; Rodriguez-Troncoso, AP	Tourist carrying capacity at Islas Marietas National Park: An essential tool to protect the coral community	Carrying capacity, Coral communities, Human activities, Limit of acceptable change, Marine protected area, Tourism	Universidad de Guadalajara	2017	10.1016/j.apgeog.2017.08.021	Geography	2022-06-20	WOS:000416192200002
Shefy, D; Guerrini, G; Marom, N; Shashar, N; Rinkevich, B	Settling in aggregation: Spatial planning consideration for brooding coral transplants	Chimerism, Allorecognition, Ecological engineering, Settlement, Reef restoration, Stylophora pistillata	Technion Israel Institute of Technology	2022	10.1016/j.marenvres.2022.105612	Environmental Sciences & Ecology; Marine & Freshwater Biology; Toxicology	2022-06-20	WOS:000795140000007
Tabalanza, TD; Jamodiong, EA; Diaz, LA; Tanedo, MCS; Leriorato, JC; Villanueva, RD; Cabaitan, PC	Successfully cultured and reared coral embryos from wild caught spawn slick in the Philippines	Multispecies spawning, Coral culture, Propagation, Coral juveniles, Coral mariculture	University of the Philippines System; University of the Philippines Diliman	2020	10.1016/j.aquaculture.2020.735354	Fisheries; Marine & Freshwater Biology	2022-06-20	WOS:000535433700007
Rogers, A; Harborne, AR; Brown, CJ; Bozec, YM; Castro, C; Chollett, I; Hock, K; Knowland, CA; Marshell, A; Ortiz, JC; Razak, T; Roff, G; Samper-Villarreal, J; Saunders, MI; Wolff, NH; Mumby, PJ	Anticipative management for coral reef ecosystem services in the 21st century	coral reefs, degraded ecosystems, ecosystem function, ecosystem services, habitat complexity, marine reserve	University of Queensland; University of Queensland; University of Exeter; University of Queensland	2015	10.1111/gcb.12725	Biodiversity & Conservation; Environmental Sciences & Ecology	2022-06-20	WOS:000348652400002
Chaitanawisuti, N; Kritsanapuntu, S	Asexual propagation of the soft corals Sinularia sp., Cladiella sp. and Sarcophyton sp. (Octocorallia: Alcyonacea) using different methods of attachment in a recirculating seawater system	asexual propagation, attachment methods, Cladiella sp, healing time, Sarcophyton sp, Self-attachment time, Sinularia sp, soft corals, survival	Chulalongkorn University; Prince of Songkla University	2019	10.1111/are.14067	Fisheries	2022-06-20	WOS:000474666300003
Montseny, M; Linares, C; Viladrich, N; Olariaga, A; Carreras, M; Palomeras, N; Gracias, N; Istenic, K; Garcia, R; Ambroso, S; Santin, A; Grinyo, J; Gili, JM; Gori, A	First attempts towards the restoration of gorgonian populations on the Mediterranean continental shelf	benthos, conservation evaluation, coral, fishing, new techniques, recovery	Consejo Superior de Investigaciones Cientificas (CSIC); CSIC - Centro Mediterraneo de Investigaciones Marinas y Ambientales (CMIMA); CSIC - Instituto de Ciencias del Mar (ICM); League of European Research Universities - LERU; University of Barcelona; Universitat de Girona	2019	10.1002/aqc.3118	Environmental Sciences & Ecology; Marine & Freshwater Biology; Water Resources	2022-06-20	WOS:000478867300009
Silva, DP; Villela, HDM; Santos, HF; Duarte, GAS; Ribeiro, JR; Ghizelini, AM; Vilela, CLS; Rosado, PM; Fazolato, CS; Santoro, EP; Carmo, FL; Ximenes, DS; Soriano, AU; Rachid, CTCC; Thurber, RLV; Peixoto, RS	Multi-domain probiotic consortium as an alternative to chemical remediation of oil spills at coral reefs and adjacent sites	Oil bioremediation, Probiotics, Coral-associated microbiome, Coral reefs, Restoration, Chemical dispersant, Corexit 9500, Millepora alcicornis	Universidade Federal do Rio de Janeiro; Universidade Federal Fluminense; Universidade Federal do Rio de Janeiro; Oregon State University; King Abdullah University of Science & Technology	2021	10.1186/s40168-021-01041-w	Microbiology	2022-06-20	WOS:000657714800001
Guest, JR; Edmunds, PJ; Gates, RD; Kuffner, IB; Andersson, AJ; Barnes, BB; Chollett, I; Courtney, TA; Elahi, R; Gross, K; Lenz, EA; Mitarai, S; Mumby, PJ; Nelson, HR; Parker, BA; Putnam, HM; Rogers, CS; Toth, LT	A framework for identifying and characterising coral reef oases against a backdrop of degradation	climate change, coral reef, decline, disturbance, oases, recovery, resilience, spatial variability	University of Hawaii System; California State University System; California State University Northridge; United States Department of the Interior; United States Geological Survey; University of California System; University of California San Diego; State University System of Florida; University of South Florida; Smithsonian Institution; Smithsonian National Museum of Natural History; Stanford Uni…	2018	10.1111/1365-2664.13179	Biodiversity & Conservation; Environmental Sciences & Ecology	2022-06-20	WOS:000447296300032
Tanaya, T; Kinjo, N; Okada, W; Yasuda, M; Kuwae, T	Improvement of the coral growth and cost-effectiveness of hybrid infrastructure by an innovative breakwater design in Naha Port, Okinawa, Japan	Green infrastructure, hybrid infrastructure, pro-environment breakwater, artificial tide pool, coral habitat restoration		2021	10.1080/21664250.2021.1889823	Engineering	2022-06-20	WOS:000624644200001
Gazulla, CR; Lopez-Sendino, P; Antunes, A; Aurelle, D; Montero-Serra, I; Dominici, JM; Linares, C; Garrabou, J; Ledoux, JB	Demo-Genetic Approach for the Conservation and Restoration of a Habitat-Forming Octocoral: The Case of Red Coral, Corallium rubrum, in the Reserve Naturelle de Scandola	Corallium rubrum, temperate habitat-forming octocoral, marine protected area, demo-genetics, connectivity, spatial genetic structure, demographic transition, marine restoration	Consejo Superior de Investigaciones Cientificas (CSIC); CSIC - Centro Mediterraneo de Investigaciones Marinas y Ambientales (CMIMA); CSIC - Instituto de Ciencias del Mar (ICM); Autonomous University of Barcelona; Universidade do Porto; Universidade do Porto; Centre National de la Recherche Scientifique (CNRS); Institut de Recherche pour le Developpement (IRD); UDICE-French Research Universities; …	2021	10.3389/fmars.2021.633057	Environmental Sciences & Ecology; Marine & Freshwater Biology	2022-06-20	WOS:000664180500001
Risk, MJ; Heikoop, JM; Edinger, EN; Erdmann, MV	The assessment 'toolbox': Community-based reef evaluation methods coupled with geochemical techniques to identify sources of stress		McMaster University; United States Department of Energy (DOE); Los Alamos National Laboratory; Saint Francis Xavier University - Canada; University of California System; University of California Berkeley	2001		Marine & Freshwater Biology; Oceanography	2022-06-20	WOS:000172609000017
Obura, DO	Can differential bleaching and mortality among coral species offer useful indicators for assessment and management of reefs under stress?			2001		Marine & Freshwater Biology; Oceanography	2022-06-20	WOS:000172609000016
Kikuzawa, YP; Ng, CSL; Sam, SQ; Toh, TC; Tan, KS; Loo, PL; Chou, LM	Transplanting Coral Fragments in Close Contact Enhances Their Survival and Growth on Seawalls	coral transplantation, ecological engineering, coral growth, coral survivorship, contact reaction, massive corals, coral fusion, Singapore	National University of Singapore; National University of Singapore; National University of Singapore	2021	10.3390/jmse9121377	Engineering; Oceanography	2022-06-20	WOS:000737772000001
Craggs, J; Guest, JR; Davis, M; Simmons, J; Dashti, E; Sweet, M	Inducing broadcast coral spawning ex situ: Closed system mesocosm design and husbandry protocol	Acropora, gametogenic cycle ex situ, insolation, lunar cycle, photoperiod	University of Derby; Newcastle University - UK	2017	10.1002/ece3.3538	Environmental Sciences & Ecology; Evolutionary Biology	2022-06-20	WOS:000418824800052
Dubininkas, V	Effects of substratum on the growth and survivorship of Montipora capitata and Porites lobata transplants	Coenosarc tissue, Coral reef, Coral transplantation, Reef restoration, Substrate		2017	10.1016/j.jembe.2016.10.004	Environmental Sciences & Ecology; Marine & Freshwater Biology	2022-06-20	WOS:000390495800016
Hempel, LC; Morozova, S	Science into policy: Designing coral reef management from the benthos up		Claremont Colleges; Claremont Graduate School	2001		Marine & Freshwater Biology; Oceanography	2022-06-20	WOS:000172609000053
Scott, F; Antolinez, JAA; McCall, R; Storlazzi, C; Reniers, A; Pearson, S	Hydro-Morphological Characterization of Coral Reefs for Wave Runup Prediction	data mining, cluster analysis, K-means, coral reefs, wave runup, XBeach	Deltares; United States Department of the Interior; United States Geological Survey; Delft University of Technology	2020	10.3389/fmars.2020.00361	Environmental Sciences & Ecology; Marine & Freshwater Biology	2022-06-20	WOS:000535525500001
Rogers, CS; Miller, J	Coral bleaching, hurricane damage, and benthic cover on coral reefs in St John, US Virgin Islands: A comparison of surveys with the chain transect method and videography		United States Department of the Interior; United States Geological Survey; United States Department of the Interior	2001		Marine & Freshwater Biology; Oceanography	2022-06-20	WOS:000172609000018
Creed, JC; Junqueira, ADR; Fleury, BG; Mantelatto, MC; Oigman-Pszczol, SS	The Sun-Coral Project: the first social-environmental initiative to manage the biological invasion of Tubastraea spp. in Brazil	control, environmental education, eradication, extra income, management, monitoring, sun corals	Universidade do Estado do Rio de Janeiro; Universidade Federal do Rio de Janeiro; Universidade do Estado do Rio de Janeiro	2017	10.3391/mbi.2017.8.2.06	Biodiversity & Conservation	2022-06-20	WOS:000405240100006
Wen, CKC; Chen, KS; Hsieh, HJ; Hsu, CM; Chen, CA	High coral cover and subsequent high fish richness on mature breakwaters in Taiwan	Man-made structure, Artificial reef, Coral reef fishes	James Cook University; Taiwan Fish Research Institute; National Taiwan University; Academia Sinica - Taiwan; Academia Sinica - Taiwan	2013	10.1016/j.marpolbul.2013.04.031	Environmental Sciences & Ecology; Marine & Freshwater Biology	2022-06-20	WOS:000321937700021
Shumway, N; Bell-James, J; Fitzsimons, JA; Foster, R; Gillies, C; Lovelock, CE	Policy solutions to facilitate restoration in coastal marine environments	Marine restoration, Restoration policy, Nature-based solutions, Coastal resilience, Australia, Oyster reefs, Coral reefs, Mangroves, Seagrass, Saltmarsh	University of Queensland; University of Queensland; University of Queensland; Deakin University; James Cook University; University of Queensland	2021	10.1016/j.marpol.2021.104789	Environmental Sciences & Ecology; International Relations	2022-06-20	WOS:000697681600008
Zuo, XL; Su, FZ; Zhang, JJ; Wu, WZ	Using Landsat Data to Detect Change in Live to Recently (< 6 Months) Dead Coral Cover in the Western Xisha Islands, South China Sea	coral reef, coral cover, remote sensing, change detection, Xisha Islands, South China Sea, climate warming	Guangxi University; Chinese Academy of Sciences; Institute of Geographic Sciences & Natural Resources Research, CAS; Guangxi University	2020	10.3390/su12135237	Science & Technology - Other Topics; Environmental Sciences & Ecology	2022-06-20	WOS:000550120900001
Camacho, R; Steele, S; Challenger, S; Archibald, M	Status of coral reefs in Antigua & Barbuda: using data to inform management	Coral reefs, Antigua and Barbuda, MPA, Marine survey, Ecosystem based management, Coral reef ecology, Caribbean reefs, Atlantic Gulf rapid reef assessment, Redonda		2020	10.7717/peerj.9236	Science & Technology - Other Topics	2022-06-20	WOS:000537133200008
Viehman, S; Thur, SM; Piniak, GA	Coral reef metrics and habitat equivalency analysis		National Oceanic Atmospheric Admin (NOAA) - USA; National Oceanic Atmospheric Admin (NOAA) - USA	2009	10.1016/j.ocecoaman.2008.12.004	Oceanography; Water Resources	2022-06-20	WOS:000264533600005
O'Cain, ED; Frischer, ME; Harrison, JS; Walters, TL; Thompson, ME; Fogarty, ND; Ruzicka, R; Gleason, DF	Identification of newly settled Caribbean coral recruits by ITS-targeted single-step nested multiplex PCR	Caribbean, Recruit, Molecular Assay, Single-Step Nested Multiplex PCR, Internal Transcribed Spacer Region	University System of Georgia; Georgia Southern University; University System of Georgia; University of Georgia; Skidaway Institute of Oceanography; University System of Georgia; Georgia Southern University; University System of Georgia; University of Georgia; Skidaway Institute of Oceanography; Nova Southeastern University; Florida Fish & Wildlife Conservation Commission	2019	10.1007/s00338-018-01763-8	Marine & Freshwater Biology	2022-06-20	WOS:000457139000007
Edwards, AJ; Guest, JR; Heyward, AJ; Villanueva, RD; Baria, MV; Bollozos, ISF; Golbuu, Y	Direct seeding of mass-cultured coral larvae is not an effective option for reef rehabilitation	Larval seeding, Coral reef rehabilitation, Larval rearing, Acropora digitifera, Mass spawning, Density dependent mortality, Palau	Newcastle University - UK; Australian Institute of Marine Science; University of Western Australia; University of the Philippines System; University of the Philippines Diliman	2015	10.3354/meps11171	Environmental Sciences & Ecology; Marine & Freshwater Biology; Oceanography	2022-06-20	WOS:000354393700009
Pyle, RL; Boland, R; Bolick, H; Bowen, BW; Bradley, CJ; Kane, C; Kosaki, RK; Langston, R; Longenecker, K; Montgomery, A; Parrish, FA; Popp, BN; Rooney, J; Smith, CM; Wagner, D; Spalding, HL	A comprehensive investigation of mesophotic coral ecosystems in the Hawaiian Archipelago	Mesophotic coral ecosystems, Hawaiian Archipelago, Endemism, Refugia, Closed-circuit rebreathers, Amino acid isotopic composition	National Oceanic Atmospheric Admin (NOAA) - USA; University of Hawaii System; University of Hawaii Manoa; University of California System; University of California Merced; University of Hawaii System; University of Hawaii Manoa; Washington State University; National Oceanic Atmospheric Admin (NOAA) - USA; United States Department of the Interior; US Fish & Wildlife Service; University of Hawaii S…	2016	10.7717/peerj.2475	Science & Technology - Other Topics	2022-06-20	WOS:000385574500002
Liu, ZZ; Cui, BS; He, Q	Shifting paradigms in coastal restoration: Six decades' lessons from China	Coastal environment, Conservation strategies, Ecosystem management, Restoration policies and practices, China's coastal ecosystems	Beijing Normal University; Duke University	2016	10.1016/j.scitotenv.2016.05.049	Environmental Sciences & Ecology	2022-06-20	WOS:000381060900023
Roach, TNF; Dilworth, J; Martin, CH; Jones, AD; Quinn, RA; Drury, C	Metabolomic signatures of coral bleaching history		University of Hawaii System; University of Hawaii Manoa; University of Miami; Michigan State University	2021	10.1038/s41559-020-01388-7	Environmental Sciences & Ecology; Evolutionary Biology	2022-06-20	WOS:000616031200001
Tagliafico, A; Rudd, D; Rangel, MS; Kelaher, BP; Christidis, L; Cowden, K; Scheffers, SR; Benkendorff, K	Lipid-enriched diets reduce the impacts of thermal stress in corals	Lipid-enriched Artemia, Omega-3 fatty acids, Polyunsaturated fatty acids, Coral feeding, Acropora millepora, Duncanopsammia axifuga	Southern Cross University; Southern Cross University	2017	10.3354/meps12177	Environmental Sciences & Ecology; Marine & Freshwater Biology; Oceanography	2022-06-20	WOS:000404123900010
Fine, M; Cinar, M; Voolstra, CR; Safa, A; Rinkevich, B; Laffoley, D; Hilmi, N; Allemand, D	Coral reefs of the Red Sea - Challenges and potential solutions	Red Sea, Coral reefs, Global change, Environmental policy, SWOT analysis	Bar Ilan University; Loyola University Chicago; University of Konstanz	2019	10.1016/j.rsma.2018.100498	Environmental Sciences & Ecology; Marine & Freshwater Biology	2022-06-20	WOS:000459857400031
Calle-Trivino, J; Muniz-Castillo, AI; Cortes-Useche, C; Morikawa, M; Sellares-Blasco, R; Arias-Gonzalez, JE	Approach to the Functional Importance of Acropora cervicornis in Outplanting Sites in the Dominican Republic	Acropora cervicornis, coral reef restoration, outplanting sites, ecosystem services, Dominican Republic	Instituto Politecnico Nacional - Mexico	2021	10.3389/fmars.2021.668325	Environmental Sciences & Ecology; Marine & Freshwater Biology	2022-06-20	WOS:000668132400001
Majumdar, D; Chakraborty, S; Saha, S; Datta, D	Geospatial analysis of the effects of tsunami on coral and mangrove ecosystems of Mayabunder in Andaman Islands, India	Coral reef, Human induced stress, Mangrove, Remote sensing, Tsunami	Jadavpur University; Indian Institute of Engineering Science Technology Shibpur (IIEST)	2019	10.1590/S1679-87592019025806715	Marine & Freshwater Biology; Oceanography	2022-06-20	WOS:000501499100001
Castro-Sanguino, C; Bozec, YM; Callaghan, D; Vercelloni, J; Rodriguez-Ramirez, A; Lopez-Marcano, S; Gonzalez-Marrero, Y; Puotinen, M; Hoegh-Guldberg, O; Gonzalez-Rivero, M	Coral composition and bottom-wave metrics improve understanding of the patchiness of cyclone damage on reefs	Coral morphology, Disturbance impacts, Tropical storms, Reef environment, Wave damage	University of Queensland; University of Queensland; Consejo Superior de Investigaciones Cientificas (CSIC); Australian Institute of Marine Science; Australian Institute of Marine Science	2022	10.1016/j.scitotenv.2021.150178	Environmental Sciences & Ecology	2022-06-20	WOS:000701742400009
Mbije, NE; Spanier, E; Rinkevich, B	A first endeavour in restoring denuded, post-bleached reefs in Tanzania	coral bleaching, coral gardening, Mafia, restoration, Zanzibar	Sokoine University of Agriculture; University of Haifa; University of Haifa	2013	10.1016/j.ecss.2013.04.021	Marine & Freshwater Biology; Oceanography	2022-06-20	WOS:000321414100005
Rocha, RJM; Bontas, B; Cartaxana, P; Leal, MC; Ferreira, JM; Rosa, R; Serodio, J; Calado, R	Development of a Standardized Modular System for Experimental Coral Culture		Universidade de Aveiro; Universidade de Aveiro; University of Bacau; Universidade de Lisboa; University System of Georgia; University of Georgia; Skidaway Institute of Oceanography; Universidade de Lisboa	2015	10.1111/jwas.12186	Fisheries	2022-06-20	WOS:000355679500001
Bruckner, AW; Bruckner, RJ	Condition of restored Acropora palmata fragments off Mona Island, Puerto Rico, 2 years after the Fortuna Reefer ship grounding	Habitat restoration, coral reef, Acropora palmata, Elkhorn coral, ship grounding	National Oceanic Atmospheric Admin (NOAA) - USA; National Oceanic Atmospheric Admin (NOAA) - USA	2001		Marine & Freshwater Biology	2022-06-20	WOS:000172560800007
Montero-Serra, I; Garrabou, J; Doak, DF; Figuerola, L; Hereu, B; Ledoux, JB; Linares, C	Accounting for Life-History Strategies and Timescales in Marine Restoration	Comparative demography, coral reefs, Corallium rubrum, integral projection models, life-history tradeoffs, octocorals, restoration, Mediterranean sea, transplants	League of European Research Universities - LERU; University of Barcelona; Consejo Superior de Investigaciones Cientificas (CSIC); CSIC - Centro Mediterraneo de Investigaciones Marinas y Ambientales (CMIMA); CSIC - Instituto de Ciencias del Mar (ICM); UDICE-French Research Universities; Aix-Marseille Universite; Universite de Toulon; University of Colorado System; University of Colorado Boulder; U…	2018	10.1111/conl.12341	Biodiversity & Conservation	2022-06-20	WOS:000424825900003
Godefroid, M; Todinanahary, GGB; Dubois, P; Eeckhaut, I; Sturaro, N; Lepoint, G; Terrana, L	Perspectives on working underwater with black coral nubbins (Cnidaria: Antipatharia): The case of Cirrhipathes anguina (Dana, 1846)	Black corals, Transplants, Growth, Healing, Cirrhipathes anguina, Madagascar	Universite Libre de Bruxelles; Vrije Universiteit Brussel; University of Mons; University of Liege	2021	10.1016/j.jembe.2021.151645	Environmental Sciences & Ecology; Marine & Freshwater Biology	2022-06-20	WOS:000709222300002
Lin, YJ; Roa-Ureta, RH; Basali, AU; Alcaria, JFA; Lindo, R; Qurban, MA; Prihartato, PK; Qasem, A; Rabaoui, L	Coarser taxonomic resolutions are informative in revealing fish community abundance trends for the world's warmest coral reefs	Arabian Gulf, Coral Reef, Dynamic factor analysis, Fish communities, Multivariate time series, Taxonomic resolution	King Fahd University of Petroleum & Minerals; Universidade do Algarve	2021	10.1007/s00338-021-02181-z	Marine & Freshwater Biology	2022-06-20	WOS:000700001700002
Humanes, A; Beauchamp, EA; Bythell, JC; Carle, MK; Craggs, JR; Edwards, AJ; Golbuu, Y; Lachs, L; Martinez, HM; Palmowski, P; Paysinger, F; Randle, JL; van der Steeg, E; Sweets, M; Treumann, A; Guest, JR	An Experimental Framework for Selectively Breeding Corals for Assisted Evolution	selective breeding, larval rearing, nursery, restorative efforts, outplanting, growth, monitoring, survivorship	Newcastle University - UK; University of Derby	2021	10.3389/fmars.2021.669995	Environmental Sciences & Ecology; Marine & Freshwater Biology	2022-06-20	WOS:000658930000001
Goreau, TJ; Fisher, T; Perez, F; Lockhart, K; Hibbert, M; Lewin, A	Turks and Caicos Islands 2006 coral reef assessment: Large-scale environmental and ecological interactions and their management implications	large-scale coral reef ecological assessment, environmental gradient analysis, non-parametric statistics, coastal zone management, algae zonation, coral community assemblages, diseases, bleaching		2008		Life Sciences & Biomedicine - Other Topics	2022-06-20	WOS:000266642200003
Luckett, C; Adey, WH; Morrissey, J; Spoon, DM	Coral reef mesocosms and microcosms - Successes, problems, and the future of laboratory models	coral reef, mesocosm, microcosm, ecological engineering, Caribbean Sea, Great Barrier Reef, Biosphere 2, Bahamas		1996	10.1016/0925-8574(95)00051-8	Environmental Sciences & Ecology; Engineering	2022-06-20	WOS:A1996UU94700004
Chuang, PS; Mitarai, S	Signaling pathways in the coral polyp bail-out response	Polyp bail-out, Apoptosis, ECM degradation, Signaling pathway, Transcriptome	Okinawa Institute of Science & Technology Graduate University	2020	10.1007/s00338-020-01983-x	Marine & Freshwater Biology	2022-06-20	WOS:000554334900002
Mousavi, SH; Danehkar, A; Shokri, MR; Poorbagher, H; Azhdari, D	Site selection for artificial reefs using a new combine Multi-Criteria Decision-Making (MCDM) tools for coral reefs in the Kish Island - Persian Gulf	Site selection, Artificial reef, Coral reefs, SMCDM, Kish Island, Persian Gulf	University of Tehran; Shahid Beheshti University Medical Sciences; University of Tehran	2015	10.1016/j.ocecoaman.2015.03.004	Oceanography; Water Resources	2022-06-20	WOS:000355885800009
Neilson, BJ; Wall, CB; Mancini, FT; Gewecke, CA	Herbivore biocontrol and manual removal successfully reduce invasive macroalgae on coral reefs	Invasive species, Biocontrol, Macroalgae, Kaneohe bay, Kappaphycus, Eucheuma, Tripneustes, Gracilaria, Acanthophora, Coral reef	University of Hawaii System; University of Hawaii Manoa	2018	10.7717/peerj.5332	Science & Technology - Other Topics	2022-06-20	WOS:000441110900004
Marhaver, KL; Vermeij, MJA; Medina, MM	Reproductive natural history and successful juvenile propagation of the threatened Caribbean Pillar Coral Dendrogyra cylindrus	Coral reproduction, Early life history, Spermcasting, Larvae, Threatened species, Coral reefs, Pillar coral, Dendrogyra cylindrus, Caribbean	University of California System; University of California Merced; League of European Research Universities - LERU; University of Amsterdam	2015	10.1186/s12898-015-0039-7	Environmental Sciences & Ecology	2022-06-20	WOS:000350949700001
Fujii, T; Tanaka, Y; Maki, K; Saotome, N; Morimoto, N; Watanabe, A; Miyajima, T	Organic Carbon and Nitrogen Isoscapes of Reef Corals and Algal Symbionts: Relative Influences of Environmental Gradients and Heterotrophy	carbon isotopes, compound-specific isotope ratios of amino acids, hermatypic coral, heterotrophy, microhabitat, nitrogen isotopes, Symbiodinium, terrestrial nutrient input	University of Tokyo; Tokyo Institute of Technology; University Brunei Darussalam; Yakult Honsha Company, Limited	2020	10.3390/microorganisms8081221	Microbiology	2022-06-20	WOS:000564788300001
Romatzki, SBC	Influence of electrical fields on the performance of Acropora coral transplants on two different designs of structures	Artificial reefs, coral growth, coral transplantation, mineral accretion technique	Leibniz Zentrum fur Marine Tropenforschung (ZMT)	2014	10.1080/17451000.2013.814794	Environmental Sciences & Ecology; Marine & Freshwater Biology	2022-06-20	WOS:000329776200002
Matus, IV; Alves, JL; Gois, J; da Rocha, AB; Neto, R; Mota, CD	Effect of 3D printer enabled surface morphology and composition on coral growth in artificial reefs	Design, Additive manufacturing, Artificial reef, Coral propagation, Limestone substrates, Portland cement mortar	Universidade do Porto; Universidade do Porto; Universidade do Porto; Universidade do Porto	2021	10.1108/RPJ-07-2020-0165	Engineering; Materials Science	2022-06-20	WOS:000636407000001
Salinas-de-Leon, P; Dryden, C; Smith, DJ; Bell, JJ	Temporal and spatial variability in coral recruitment on two Indonesian coral reefs: consistently lower recruitment to a degraded reef		Victoria University Wellington; Newcastle University - UK; University of Essex	2013	10.1007/s00227-012-2066-7	Marine & Freshwater Biology	2022-06-20	WOS:000313047600009
Rilov, G; Benayahu, Y	Vertical artificial structures as an alternative habitat for coral reef fishes in disturbed environments	artificial reefs, coral reef, fish community, recruitment, Red Sea	Tel Aviv University; Tel Aviv University	1998	10.1016/S0141-1136(98)00106-8	Environmental Sciences & Ecology; Marine & Freshwater Biology; Toxicology	2022-06-20	WOS:000075408800009
Lohr, KE; Khattri, RB; Guingab-Cagmat, J; Camp, EF; Merritt, ME; Garrett, TJ; Patterson, JT	Metabolomic profiles differ among unique genotypes of a threatened Caribbean coral		State University System of Florida; University of Florida; State University System of Florida; University of Florida; State University System of Florida; University of Florida; University of Technology Sydney	2019	10.1038/s41598-019-42434-0	Science & Technology - Other Topics	2022-06-20	WOS:000464495700015
Lirman, D; Schopmeyer, S; Galvan, V; Drury, C; Baker, AC; Baums, IB	Growth Dynamics of the Threatened Caribbean Staghorn Coral Acropora cervicornis: Influence of Host Genotype, Symbiont Identity, Colony Size, and Environmental Setting		University of Miami; Pennsylvania Commonwealth System of Higher Education (PCSHE); Pennsylvania State University	2014	10.1371/journal.pone.0107253	Science & Technology - Other Topics	2022-06-20	WOS:000343671700034
Randall, CJ; Whitcher, EM; Code, T; Pollock, C; Lundgren, I; Hillis-Starr, Z; Muller, EM	Testing methods to mitigate Caribbean yellow-band disease on Orbicella faveolata	Yellow-band disease, Orbicella faveolata, Coral disease, Transmission, Aspiration Shade, Firebreak, Chisel, Caribbean, Coral	Florida Institute of Technology; Australian Institute of Marine Science; United States Department of the Interior; Mote Marine Laboratory & Aquarium	2018	10.7717/peerj.4800	Science & Technology - Other Topics	2022-06-20	WOS:000432018300011
Shinzato, C; Yasuoka, Y; Mungpakdee, S; Arakaki, N; Fujie, M; Nakajima, Y; Satoh, N	Development of novel, cross-species microsatellite markers for Acropora corals using next-generation sequencing technology	scleractinian coral, Acropora, microsatellite, population genetics, cross-species, Illumine next-generation sequencing	Okinawa Institute of Science & Technology Graduate University; Okinawa Institute of Science & Technology Graduate University; Okinawa Institute of Science & Technology Graduate University	2014	10.3389/fmars.2014.00011	Environmental Sciences & Ecology; Marine & Freshwater Biology	2022-06-20	WOS:000485310600010
Alvarado, JJ; Sanchez-Noguera, C; Arias-Godinez, G; Araya, T; Fernandez-Garcia, C; Guzman, AG	Impact of El Nino 2015-2016 on the coral reefs of the Pacific of Costa Rica: the potential role of marine protection	coral bleaching, El Nino, crustose coralline algae, conservation strategies, marine protected areas, resilience, Cocos Island	Universidad Costa Rica; Universidad Costa Rica; Universidad Costa Rica; Conservation International	2020		Life Sciences & Biomedicine - Other Topics	2022-06-20	WOS:000532610600019
Scharfenstein, HJ; Chan, WY; Buerger, P; Humphrey, C; van Oppen, MJH	Evidence for de novo acquisition of microalgal symbionts by bleached adult corals		University of Melbourne; Australian Institute of Marine Science; Macquarie University	2022	10.1038/s41396-022-01203-0	Environmental Sciences & Ecology; Microbiology	2022-06-20	WOS:000752185400001
Jayanthi, M; Edward, JKP; Malleshappa, H; Asir, NGG; Mathews, G; Raj, KD; Bilgi, DS; Kumar, TKA; Sannasiraj, SA	Perforated trapezoidal artificial reefs can augment the benefits of restoration of island and its marine ecosystem	Gulf of Mannar, island restoration, perforated trapezoidal artificial reefs, species richness, Vaan Island	Indian Institute of Technology System (IIT System); Indian Institute of Technology (IIT) - Madras	2020	10.1111/rec.13041	Environmental Sciences & Ecology	2022-06-20	WOS:000498137400001
Terron-Sigler, A; Leon-Muez, D; Penalver-Duque, P; Torre, FE	A method for increasing the survival of shallow-water populations of the endemic coral Astroides calycularis	Astroides calycularis, translocation, transplantation, epoxy resin, hydrodynamism, Mediterranean Sea	University of Sevilla	2018	10.1017/S0025315416001806	Marine & Freshwater Biology	2022-06-20	WOS:000435649100017
Bradley, P; Jessup, B; Pittman, SJ; Jeffrey, CFG; Ault, JS; Carrubba, L; Lilyestrom, C; Appeldoorn, RS; Scharer, MT; Walker, BK; McField, M; Santavy, DL; Smith, TB; Garcia-Moliner, G; Smith, SG; Huertas, E; Gerritsen, J; Oliver, LM; Horstmann, C; Jackson, SK	Development of a reef fish biological condition gradient model with quantitative decision rules for the protection and restoration of coral reef ecosystems	Biological attributes, Biocriteria, Thresholds, Sustainability	University of Miami; National Oceanic Atmospheric Admin (NOAA) - USA; University of Puerto Rico; University of Puerto Rico Mayaguez; Nova Southeastern University; Smithsonian Institution; Smithsonian National Museum of Natural History; United States Environmental Protection Agency; University of the Virgin Islands; National Oceanic Atmospheric Admin (NOAA) - USA; United States Environmental Prote…	2020	10.1016/j.marpolbul.2020.111387	Environmental Sciences & Ecology; Marine & Freshwater Biology	2022-06-20	WOS:000568699400016
Daly, J; Zuchowicz, N; Lendo, CIN; Khosla, K; Lager, C; Henley, EM; Bischof, J; Kleinhans, FW; Lin, CH; Peters, EC; Hagedorn, M	Successful cryopreservation of coral larvae using vitrification and laser warming		Smithsonian Institution; Smithsonian National Zoological Park & Conservation Biology Institute; University of Minnesota System; University of Minnesota Twin Cities; University of Minnesota System; University of Minnesota Twin Cities; Indiana University System; Indiana University-Purdue University Indianapolis; National Museum of Marine Biology & Aquarium; National Dong Hwa University; George Maso…	2018	10.1038/s41598-018-34035-0	Science & Technology - Other Topics	2022-06-20	WOS:000448109000039
McKenna, SA; Richmond, RH; Roos, G	Assessing the effects of sewage on coral reefs: Developing techniques to detect stress before coral mortality		University of Guam	2001		Marine & Freshwater Biology; Oceanography	2022-06-20	WOS:000172609000023
Kitchen, SA; Von Kuster, G; Kuntz, KLV; Reich, HG; Miller, W; Griffin, S; Fogarty, ND; Baums, IB	STAGdb: a 30K SNP genotyping array and Science Gateway for Acropora corals and their dinoflagellate symbionts		Pennsylvania Commonwealth System of Higher Education (PCSHE); Pennsylvania State University; Pennsylvania State University - University Park; Pennsylvania Commonwealth System of Higher Education (PCSHE); Pennsylvania State University; Pennsylvania State University - University Park; Pennsylvania Commonwealth System of Higher Education (PCSHE); Pennsylvania State University; Pennsylvania State Uni…	2020	10.1038/s41598-020-69101-z	Science & Technology - Other Topics	2022-06-20	WOS:000556872700021
Chipeaux, A; Pinault, M; Pascal, N; Pioch, S	ANALYSE COMPAREE A L'ECHELLE MONDIALE DES TECHNIQUES D'INGENIERIE ECOLOGIQUES ADAPTEES A LA RESTAURATION DES RECIFS CORALLIENS		Centre National de la Recherche Scientifique (CNRS); CNRS - Institute of Ecology & Environment (INEE); PSL Research University Paris; Ecole Pratique des Hautes Etudes (EPHE); Institut Agro; Montpellier SupAgro; CIRAD; Institut de Recherche pour le Developpement (IRD); Universite Paul-Valery; Universite de Montpellier; University of La Reunion; Centre National de la Recherche Scientifique (CNRS); …	2016		Environmental Sciences & Ecology	2022-06-20	WOS:000397182900001
Flint, M; Than, JT	Potential spawn induction and suppression agents in Caribbean Acropora cervicornis corals of the Florida Keys	L-5-hydroxytryptophan, Phosphate, Acropora cervicornis, Spawning, Induction, Coral	State University System of Florida; University of Florida	2016	10.7717/peerj.1982	Science & Technology - Other Topics	2022-06-20	WOS:000375186000009
Borell, EM; Romatzki, SBC; Ferse, SCA	Differential physiological responses of two congeneric scleractinian corals to mineral accretion and an electric field	Acropora pulchra, A. yongei, Cathode, Chlorophyll fluorescence, Growth, Mortality	Leibniz Zentrum fur Marine Tropenforschung (ZMT)	2010	10.1007/s00338-009-0564-y	Marine & Freshwater Biology	2022-06-20	WOS:000274294200024
Patterson, JT; Flint, M; Than, J; Watson, CA	Evaluation of Substrate Properties for Settlement of Caribbean Staghorn Coral Acropora cervicornis Larvae in a Land-Based System		State University System of Florida; University of Florida; State University System of Florida; University of Florida	2016	10.1080/15222055.2016.1185068	Fisheries	2022-06-20	WOS:000385632600008
Tonin, S	Estimating the benefits of restoration And preservation scenarios of marine biodiversity: An application of the contingent valuation method	Coralligenous habitat, Contingent valuation method, Marine biodiversity, Restoration, Prevention policy, Ghost fishing	IUAV University Venice; Universita Ca Foscari Venezia	2019	10.1016/j.envsci.2019.07.004	Environmental Sciences & Ecology	2022-06-20	WOS:000480376500017
Kotb, MMA	Coral translocation and farming as mitigation and conservation measures for coastal development in the Red Sea: Aqaba case study, Jordan	Coral nursery, Growth, Survival, Rehabilitation, Management	Egyptian Knowledge Bank (EKB); Suez Canal University	2016	10.1007/s12665-016-5304-3	Environmental Sciences & Ecology; Geology; Water Resources	2022-06-20	WOS:000372171700079
Wulff, J	Assessing and monitoring coral reef sponges: Why and how?		State University System of Florida; Florida State University	2001		Marine & Freshwater Biology; Oceanography	2022-06-20	WOS:000172609000045
Randall, CJ; Speaks, JE; Lager, C; Hagedorn, M; Llewellyn, L; Pulak, R; Thompson, J; Bay, LK; Mead, D; Heyward, AJ; Negri, AP	Rapid counting and spectral sorting of live coral larvae using large-particle flow cytometry		Australian Institute of Marine Science; Smithsonian Institution; Smithsonian National Zoological Park & Conservation Biology Institute; Australian Institute of Marine Science; University of Western Australia	2020	10.1038/s41598-020-69491-0	Science & Technology - Other Topics	2022-06-20	WOS:000556411200018
Giddens, J; Friedlander, AM; Conklin, E; Wiggins, C; Stamoulis, K; Donovan, MK	Experimental removal of the invasive peacock hind (roi) Cephalopholis argus, in Puako, Hawai'i: methods for assessing and managing marine invasive species	Invasive species, Cephalopholis argus, Hawaii, Mortality rate, Leslie depletion, Predator removal, Marine introduction, Grouper, Ecosystem restoration	University of Hawaii System; University of Hawaii Manoa; Nature Conservancy	2014	10.3354/meps10919	Environmental Sciences & Ecology; Marine & Freshwater Biology; Oceanography	2022-06-20	WOS:000342924200017
Gilby, BL; Olds, AD; Connolly, RM; Stevens, T; Henderson, CJ; Maxwell, PS; Tibbetts, IR; Schoeman, DS; Rissik, D; Schlacher, TA	Optimising Land-Sea Management for Inshore Coral Reefs		University of the Sunshine Coast; Griffith University; University of Queensland; University of Queensland; Griffith University	2016	10.1371/journal.pone.0164934	Science & Technology - Other Topics	2022-06-20	WOS:000386204500081
Gibbs, DA; West, JM; Bradley, P	Incorporating adaptation and resilience into an integrated watershed and coral reef management plan		United States Environmental Protection Agency; United States Environmental Protection Agency	2021	10.1371/journal.pone.0253343	Science & Technology - Other Topics	2022-06-20	WOS:000671692800017
Gordon, TAC; Radford, AN; Davidson, IK; Barnes, K; McCloskey, K; Nedelec, SL; Meekan, MG; McCormick, MI; Simpson, SD	Acoustic enrichment can enhance fish community development on degraded coral reef habitat		University of Exeter; Australian Institute of Marine Science; University of Bristol; James Cook University; James Cook University	2019	10.1038/s41467-019-13186-2	Science & Technology - Other Topics	2022-06-20	WOS:000500468400001
Robert, K; Jones, DOB; Georgiopoulou, A; Huvenne, VAI	Cold-water coral assemblages on vertical walls from the Northeast Atlantic	cold-water corals, deep sea, distribution, diversity, niche differentiation, spatial patterns, vertical walls	Memorial University Newfoundland; NERC National Oceanography Centre; University of Southampton; University College Dublin; University of Brighton	2020	10.1111/ddi.13011	Biodiversity & Conservation; Environmental Sciences & Ecology	2022-06-20	WOS:000502422300001
van Katwijk, MM; Thorhaug, A; Marba, N; Orth, RJ; Duarte, CM; Kendrick, GA; Althuizen, IHJ; Balestri, E; Bernard, G; Cambridge, ML; Cunha, A; Durance, C; Giesen, W; Han, QY; Hosokawa, S; Kiswara, W; Komatsu, T; Lardicci, C; Lee, KS; Meinesz, A; Nakaoka, M; O'Brien, KR; Paling, EI; Pickerell, C; Ransijn, AMA; Verduin, JJ	Global analysis of seagrass restoration: the importance of large-scale planting	allee effect, coastal ecosystems, ecosystem recovery, global restoration trajectories, positive feedback, seagrass mitigation, seagrass rehabilitation	Radboud University Nijmegen; Yale University; Consejo Superior de Investigaciones Cientificas (CSIC); CSIC - Instituto Mediterraneo de Estudios Avanzados (IMEDEA); Universitat de les Illes Balears; William & Mary; Virginia Institute of Marine Science; University of Western Australia; University of Western Australia; King Abdullah University of Science & Technology; University of Pisa; Universidad…	2016	10.1111/1365-2664.12562	Biodiversity & Conservation; Environmental Sciences & Ecology	2022-06-20	WOS:000370959100029
Quigley, KM; van Oppen, MJH	Predictive models for the selection of thermally tolerant corals based on offspring survival		Australian Institute of Marine Science; University of Melbourne	2022	10.1038/s41467-022-28956-8	Science & Technology - Other Topics	2022-06-20	WOS:000776008000024
Rada-Osorio, D; Gomez-Lemos, LA; Garcia-Uruena, R	Early development of the threatened coral Acropora cervicornis	Staghorn coral, Embryogenesis, Larval settlement, Post-settlement survival, Symbiotic dinoflagellates acquisition	Universidad del Magdalena; Universidad Nacional de Colombia	2022	10.1007/s10750-022-04838-4	Marine & Freshwater Biology	2022-06-20	WOS:000791671000001
Miller, MW; Lohr, KE; Cameron, CM; Williams, DE; Peters, EC	Disease dynamics and potential mitigation among restored and wild staghorn coral, Acropora cervicornis	Recovery, Histopathology, Florida Keys, Tropical storm, Incidence, Restoration	National Oceanic Atmospheric Admin (NOAA) - USA; University of Miami; George Mason University	2014	10.7717/peerj.541	Science & Technology - Other Topics	2022-06-20	WOS:000347619100003
Rilov, G; Benayahu, Y	Rehabilitation of coral reef-fish communities: The importance of artificial-reef relief to recruitment rates		Duke University; Tel Aviv University	2002		Marine & Freshwater Biology; Oceanography	2022-06-20	WOS:000176268400015
Rinkevich, B	Coral chimerism as an evolutionary rescue mechanism to mitigate global climate change impacts			2019	10.1111/gcb.14576	Biodiversity & Conservation; Environmental Sciences & Ecology	2022-06-20	WOS:000461817500003
Chiappone, M; Sullivan-Sealey, K; Bustamante, G; Tschirky, J	A rapid assessment of coral reef community structure and diversity patterns at Naval Station Guantanamo Bay, Cuba		University of North Carolina; University of North Carolina Wilmington; University of Miami; Nature Conservancy	2001		Marine & Freshwater Biology; Oceanography	2022-06-20	WOS:000172609000013
Gillis, LG; Jones, CG; Ziegler, AD; van der Wal, D; Breckwoldt, A; Bouma, TJ	Opportunities for Protecting and Restoring Tropical Coastal Ecosystems by Utilizing a Physical Connectivity Approach	facilitation, ecosystem engineers, mangrove forests, seagrass beds, coral reefs, monitoring	Leibniz Zentrum fur Marine Tropenforschung (ZMT); Cary Institute of Ecosystem Studies; National University of Singapore; League of European Research Universities - LERU; Utrecht University; Royal Netherlands Institute for Sea Research (NIOZ); League of European Research Universities - LERU; Utrecht University; Helmholtz Association; Alfred Wegener Institute, Helmholtz Centre for Polar & Marine Re…	2017	10.3389/fmars.2017.00374	Environmental Sciences & Ecology; Marine & Freshwater Biology	2022-06-20	WOS:000457690600372
Nipper, M; Carr, RS	Porewater toxicity testing: A novel approach for assessing contaminant impacts in the vicinity of coral reefs		Texas A&M University System; Texas A&M University System; United States Department of the Interior; United States Geological Survey	2001		Marine & Freshwater Biology; Oceanography	2022-06-20	WOS:000172609000015
Yap, HT	The case for restoration of tropical coastal ecosystems		University of the Philippines System; University of the Philippines Diliman	2000	10.1016/S0964-5691(00)00061-2	Oceanography; Water Resources	2022-06-20	WOS:000089484400012
Samways, MJ; Hatton, MJ	An appraisal of two coral reef rapid monitoring manuals for gathering baseline data		University of Kwazulu Natal	2001		Marine & Freshwater Biology; Oceanography	2022-06-20	WOS:000172609000019
Higgins, E; Sobolev, K	Data-Driven Coral Reef Rehabilitation Using New Biomimicking, Advanced Materials Artificial Reefs		University of Wisconsin System; University of Wisconsin Milwaukee	2021		Engineering; Oceanography	2022-06-20	WOS:000707639700040
Linares, C; Coma, R; Zabala, M	Restoration of threatened red gorgonian populations: An experimental and modelling approach	octocorals, Paramuricea clavata, restoration, transplants, matrix models, conservation, marine protected areas	Consejo Superior de Investigaciones Cientificas (CSIC); CSIC - Centre d'Estudis Avancats de Blanes (CEAB); Consejo Superior de Investigaciones Cientificas (CSIC); CSIC - Centro Mediterraneo de Investigaciones Marinas y Ambientales (CMIMA); CSIC - Instituto de Ciencias del Mar (ICM); League of European Research Universities - LERU; University of Barcelona	2008	10.1016/j.biocon.2007.10.012	Biodiversity & Conservation; Environmental Sciences & Ecology	2022-06-20	WOS:000254599900010
Vijayavel, K; Downs, CA; Ostrander, GK; Richmond, RH	Oxidative DNA damage induced by iron chloride in the larvae of the lace coral Pocillopora damicornis	Oxidative stress, Free radicals, DNA-AP, Metal, Coral	University of Hawaii System; University of Hawaii Manoa; University of Hawaii System; University of Hawaii Manoa	2012	10.1016/j.cbpc.2011.09.007	Biochemistry & Molecular Biology; Endocrinology & Metabolism; Toxicology; Zoology	2022-06-20	WOS:000299580200014
Epstein, N; Vermeij, MJA; Bak, RPM; Rinkevich, B	Alleviating impacts of anthropogenic activities by traditional conservation measures: can a small reef reserve be sustainedly managed?	corals, eilat, gardening, human impact, marine protected areas, restoration, Stylophora pistillata	League of European Research Universities - LERU; University of Amsterdam; League of European Research Universities - LERU; Utrecht University; Royal Netherlands Institute for Sea Research (NIOZ)	2005	10.1016/j.biocon.2004.05.001	Biodiversity & Conservation; Environmental Sciences & Ecology	2022-06-20	WOS:000224135000009
O'Connor, E; Hynes, S; Chen, WT	Estimating the non-market benefit value of deep-sea ecosystem restoration: Evidence from a contingent valuation study of the Dohrn Canyon in the Bay of Naples	Marine ecological restoration, Deep-sea ecosystem services, Contingent valuation method, Non-market benefit valuation, Sample selection model	Ollscoil na Gaillimhe-University of Galway; Norwegian Institute for Water Research (NIVA)	2020	10.1016/j.jenvman.2020.111180	Environmental Sciences & Ecology	2022-06-20	WOS:000582474500011
Stottrup, JG; Dahl, K; Niemann, S; Stenberg, C; Reker, J; Stamphoj, EM; Goke, C; Svendsen, JC	Restoration of a boulder reef in temperate waters: Strategy, methodology and lessons learnt	Reef restoration, Habitat, Restoration strategy, Hydrodynamic modelling, Sediment transport modelling, Natura2000, Ecosystem-based marine management	Technical University of Denmark; Aarhus University	2017	10.1016/j.ecoleng.2017.02.058	Environmental Sciences & Ecology; Engineering	2022-06-20	WOS:000399623700050
Huang, BW; Yuan, T; Liang, YX; Guo, YJ; Yuan, XC; Zhou, WH; Huang, H; Liu, S	Low electric current density enhances the calcification rate of the colonial Stony Coral Galaxea fascicularis	zooxanthellae, quantum yield, electrolytic mineral acceleration, mineral accretion, photosynthesis	Chinese Academy of Sciences; South China Sea Institute of Oceanology, CAS; Chinese Academy of Sciences; South China Sea Institute of Oceanology, CAS; Chinese Academy of Sciences; Chinese Academy of Sciences; Chinese Academy of Sciences; University of Chinese Academy of Sciences, CAS	2020	10.1080/14634988.2020.1768766	Environmental Sciences & Ecology; Marine & Freshwater Biology; Water Resources	2022-06-20	WOS:000604758000008
Hudson, JH; Goodwin, WB	Assessment of vessel grounding injury to coral reef and seagrass habitats in the Florida Keys National Marine Sanctuary, Florida: Protocol and methods		National Oceanic Atmospheric Admin (NOAA) - USA	2001		Marine & Freshwater Biology; Oceanography	2022-06-20	WOS:000172609000022
Howlett, L; Camp, EF; Edmondson, J; Henderson, N; Suggett, DJ; Ferse, SCA	Coral growth, survivorship and return-on-effort within nurseries at high-value sites on the Great Barrier Reef		University of Technology Sydney	2021	10.1371/journal.pone.0244961	Science & Technology - Other Topics	2022-06-20	WOS:000630036100028
Mercado-Molina, AE; Ruiz-Diaz, CP; Sabat, AM	Branching dynamics of transplanted colonies of the threatened coral Acropora cervicornis Morphogenesis, complexity, and modeling	Branching complexity, Branching index, Branch formation, Colony development, Horton-Strahler index, Reefs restoration	University of Puerto Rico; University of Puerto Rico Rio Piedras; University of Puerto Rico; University of Puerto Rico Rio Piedras	2016	10.1016/j.jembe.2016.05.004	Environmental Sciences & Ecology; Marine & Freshwater Biology	2022-06-20	WOS:000379370700013
Suzuki, G; Okada, W; Yasutake, Y; Kai, S; Fujikura, Y; Tanita, I; Yamashita, H; Hayashibara, T; Ando, W; Nogami, K; Fudo, M	Interspecific differences in the post-settlement survival of Acropora corals under a common garden experiment	Lattice-shaped plate, Initial growth, Artificial rehabilitation, Larval seeding	Fisheries Research Agency - Japan; Fisheries Research Agency - Japan; Ministry of Agriculture Forestry & Fisheries - Japan	2018	10.1007/s12562-018-1230-5	Fisheries	2022-06-20	WOS:000442664800012
BROCK, RE; KAM, AKH	FOCUSING THE RECRUITMENT OF JUVENILE FISHES ON CORAL-REEFS			1994		Marine & Freshwater Biology; Oceanography	2022-06-20	WOS:A1994QB58400030
Di Camillo, CG; Ponti, M; Bavestrello, G; Krzelj, M; Cerrano, C	Building a baseline for habitat-forming corals by a multi-source approach, including Web Ecological Knowledge	Biogeography, Citizen science, Foundation species, Mesophotic habitats, Social media, Web	Marche Polytechnic University; University of Bologna; University of Bologna; University of Genoa; University of Split	2018	10.1007/s10531-017-1492-8	Biodiversity & Conservation; Environmental Sciences & Ecology	2022-06-20	WOS:000426775900013
Chapman, DJ; Julius, BE	The use of preventative projects as compensatory restoration	natural resource damage assessment, NRDA, scaling, acquisition, HEA	National Oceanic Atmospheric Admin (NOAA) - USA	2005		Environmental Sciences & Ecology; Physical Geography; Geology	2022-06-20	WOS:000227787300010
Segal, B; Castro, CB	A proposed method for coral cover assessment: A case study in Abrolhos, Brazil		Universidade Federal do Rio de Janeiro	2001		Marine & Freshwater Biology; Oceanography	2022-06-20	WOS:000172609000020
Frey, JB; Berkes, F	Can partnerships and community-based conservation reverse the decline of coral reef social-ecological systems?	Bali, collective action, common pool resources, commons, fishery, governance, Indonesia, institutions	University of Manitoba	2014		Environmental Sciences & Ecology	2022-06-20	WOS:000332490900002
Alvarado-Chacon, EM; Gomez-Lemos, LA; Sierra-Sabalza, NP; Hernandez-Chamorro, AM; Lozano-Pena, JP; Valcarcel-Castellanos, CA; Pizarro, V; Garcia-Urena, R; Zarate-Arevalo, JC; Rojas, JA	Early life history of the Caribbean coral Orbicella faveolata (Scleractinia: Merulinidae)	spawning, assisted fertilization, embryogenesis, larval settlement, post-settlement survival, CCA	Universidad de Bogota Jorge Tadeo Lozano; Universidad del Magdalena	2020		Life Sciences & Biomedicine - Other Topics	2022-06-20	WOS:000577180700021
Trianni, MS; Tenorio, MC; McKagan, SC; Dunn, WO	Evaluation of a Fishery Resource Response to a Net-Use Restriction in Saipan Lagoon, Commonwealth of the Northern Mariana Islands	Fishing nets, gear restrictions, coral-reef fish, Saipan Lagoon, Micronesia	National Oceanic Atmospheric Admin (NOAA) - USA; National Oceanic Atmospheric Admin (NOAA) - USA	2018	10.2984/72.3.1	Marine & Freshwater Biology; Zoology	2022-06-20	WOS:000436484900001
Done, TJ	Useful science for coral reef management: The Cooperative Research Centre model		Australian Institute of Marine Science	2001		Marine & Freshwater Biology; Oceanography	2022-06-20	WOS:000172609000004
Lirman, D; Gracias, N; Gintert, B; Gleason, ACR; Deangelo, G; Dick, M; Martinez, E; Reid, RP	Damage and recovery assessment of vessel grounding injuries on coral reef habitats by use of georeferenced landscape video mosaics		University of Miami; Universitat de Girona; National Oceanic Atmospheric Admin (NOAA) - USA; National Geodetic Survey, NOAA	2010	10.4319/lom.2010.8.0088	Marine & Freshwater Biology; Oceanography	2022-06-20	WOS:000275416700002
Pavia, RTB; Estacion, JS	Survival and Growth of Isolated Polyps of Galaxea fascicularis (Linnaeus 1767) on Six Kinds of Culture Substrates: Implications for Mariculture, Aquarium Culture, and Conservation	coral culture, coral mariculture, culture substrates, Galaxea fascicularis	University of Santo Tomas; University of Santo Tomas; Silliman University	2019	10.1111/jwas.12538	Fisheries	2022-06-20	WOS:000457762000018
Daniels, CA; Zeifman, A; Heym, K; Ritchie, KB; Watson, CA; Berzins, I; Breitbart, M	Spatial heterogeneity of bacterial communities in the mucus of Montastraea annularis	Community profiling, ARISA, Bacteria, Coral, Spatial heterogeneity, Vibrio	State University System of Florida; University of South Florida; State University System of Florida; University of Florida; Mote Marine Laboratory & Aquarium	2011	10.3354/meps09024	Environmental Sciences & Ecology; Marine & Freshwater Biology; Oceanography	2022-06-20	WOS:000288984400003
Povak, NA; Giardina, CP; Hessburg, PF; Reynolds, KM; Salter, RB; Heider, C; Salminen, E; MacKenzie, R	A decision support tool for the conservation of tropical forest and nearshore environments on Babeldaob Island, Palau	Palau, nearshore environments, sediment, DHSVM, decision support, EMDS	United States Department of Agriculture (USDA); United States Forest Service; United States Department of Energy (DOE); Oak Ridge Institute for Science & Education; United States Department of Agriculture (USDA); United States Forest Service; United States Department of Agriculture (USDA); United States Forest Service	2020	10.1016/j.foreco.2020.118480	Forestry	2022-06-20	WOS:000581970600021
Perkol-Finkel, S; Benayahu, Y	Differential recruitment of benthic communities on neighboring artificial and natural reefs	artificial reefs, coral reefs, current velocity, recruitment, red sea	Tel Aviv University	2007	10.1016/j.jembe.2006.08.008	Environmental Sciences & Ecology; Marine & Freshwater Biology	2022-06-20	WOS:000242473000003
Ramos-Scharron, CE; Reale-Munroe, K; Atkinson, SC	Quantification and modeling of foot trail surface erosion in a dry sub-tropical setting	surface erosion, footpaths, trails, Caribbean, sediment, coral reefs	University of Texas System; University of Texas Austin; University of Texas System; University of Texas Austin; University of the Virgin Islands; University of Queensland	2014	10.1002/esp.3558	Physical Geography; Geology	2022-06-20	WOS:000343799900006
Zhang, QM; Shi, Q; Chen, G; Fong, TCW; Wong, DCC; Huang, H; Wang, HK; Zhao, MX	Status monitoring and health assessment of Luhuitou fringing reef of Sanya, Hainan, China	coral reef, fringing reef, status monitoring, health assessment, live coral cover, biodiversity, Sanya of Hainan	Chinese Academy of Sciences; South China Sea Institute of Oceanology, CAS; Chinese Academy of Sciences; Chinese Academy of Sciences	2006	10.1007/s11434-006-9081-3	Science & Technology - Other Topics	2022-06-20	WOS:000244074100012
Guo, YL; Song, H; Liu, HB; Wei, H; Yang, P; Zhan, SY; Wang, HZ; Huang, H; Liao, NF; Mu, QQ; Leng, JX; Yang, WJ	Model-based restoration of underwater spectral images captured with narrowband filters		Zhejiang University; State Oceanic Administration; Hangzhou Dianzi University; Beijing Institute of Technology; Chinese Academy of Sciences; Changchun Institute of Optics, Fine Mechanics & Physics, CAS	2016	10.1364/OE.24.013101	Optics	2022-06-20	WOS:000378298400064
Garcia-Robledo, C	Restoration of Plant-Pollinator Interactions: Pollination Neighborhood and Asymmetric Pollen Flow Between Restored Habitats in a Beetle-Pollinated Aroid	Colombia, Cyclocephala spp, isolation-by-distance model, multi-strata mark-recapture models	University of Miami	2010	10.1111/j.1526-100X.2010.00677.x	Environmental Sciences & Ecology	2022-06-20	WOS:000281717200011
Okada, T; Mito, Y; Iseri, E; Takahashi, T; Sugano, T; Akiyama, YB; Watanabe, K; Tanaya, T; Sugino, H; Tokunaga, K; Kubo, T; Kuwae, T	Method for the quantitative evaluation of ecosystem services in coastal regions	Ecosystem services, Quantitative evaluation, Wetland restoration, Ecosystem-based management, Sustainability, Tidal flat, Wetland, Artificial tidal flat	University of Tokyo; University of Tokyo; National Institute for Environmental Studies - Japan	2019	10.7717/peerj.6234	Science & Technology - Other Topics	2022-06-20	WOS:000455765300005
Asner, GP; Vaughn, NR; Foo, SA; Heckler, J; Martin, RE	Abiotic and Human Drivers of Reef Habitat Complexity Throughout the Main Hawaiian Islands	bathymetry, coral reef, Hawai'i, imaging spectroscopy, reef structure, rugosity	Arizona State University; Arizona State University-Tempe	2021	10.3389/fmars.2021.631842	Environmental Sciences & Ecology; Marine & Freshwater Biology	2022-06-20	WOS:000621387100001
Dendy, J; Cordell, S; Giardina, CP; Hwang, B; Polloi, E; Rengulbai, K	The role of remnant forest patches for habitat restoration in degraded areas of Palau	assisted regeneration, Babeldaob, birds, flying fox, nucleation, Pacific Islands	United States Department of Agriculture (USDA); United States Forest Service	2015	10.1111/rec.12268	Environmental Sciences & Ecology	2022-06-20	WOS:000363671300017
Ingo, GM; Angelini, E; Bultrini, G; De Caro, T	Contribution of surface analytical techniques for the microchemical study of archaeological artefacts	early iron metallurgy, age-embrittlement of silver coins, XPS, microchemical structure, black and red glosses, gilding	Consiglio Nazionale delle Ricerche (CNR); Polytechnic University of Turin; University of Catania	2002	10.1002/sia.1311	Chemistry	2022-06-20	WOS:000177885900072
Riegl, B; Korrubel, JL; Martin, C	Mapping and monitoring of coral communities and their spatial patterns using a surface-based video method from a vessel		University of Graz	2001		Marine & Freshwater Biology; Oceanography	2022-06-20	WOS:000172609000048
Gollner, S; Haeckel, M; Janssen, F; Lefaible, N; Molari, M; Papadopoulou, S; Reichart, GJ; Alexandre, JT; Vink, A; Vanreusel, A	Restoration experiments in polymetallic nodule areas	Artificial nodules, Deep sea, Minerals, Mining, Mitigation	League of European Research Universities - LERU; Utrecht University; Royal Netherlands Institute for Sea Research (NIOZ); Helmholtz Association; GEOMAR Helmholtz Center for Ocean Research Kiel; Helmholtz Association; Alfred Wegener Institute, Helmholtz Centre for Polar & Marine Research; Ghent University; League of European Research Universities - LERU; Utrecht University	2022	10.1002/ieam.4541	Environmental Sciences & Ecology; Toxicology	2022-06-20	WOS:000716620500001
DeAngelis, DL; Gross, LJ; Huston, MA; Wolff, WF; Fleming, DM; Comiskey, EJ; Sylvester, SM	Landscape modeling for everglades ecosystem restoration	everglades, landscape model, ecosystem model, indicator species, wetlands, computer simulation	United States Department of the Interior; United States Geological Survey; University of Miami; University of Tennessee System; University of Tennessee Knoxville; United States Department of the Interior; United States Geological Survey	1998	10.1007/s100219900006	Environmental Sciences & Ecology	2022-06-20	WOS:000075676100006
Kirsch, KD; Barry, KA; Fonseca, MS; Whitfield, PE; Meehan, SR; Kenworthy, WJ; Julius, BE	The mini-312 program - An expedited damage assessment and restoration process for seagrasses in the Florida Keys National Marine Sanctuary	differential global position system, modeling, habitat equivalency analysis, habitat recovery, vessel groundings, seagrass disturbance, natural resource damage assessment	National Oceanic Atmospheric Admin (NOAA) - USA; National Oceanic Atmospheric Admin (NOAA) - USA; National Oceanic Atmospheric Admin (NOAA) - USA	2005		Environmental Sciences & Ecology; Physical Geography; Geology	2022-06-20	WOS:000227787300009
Pages-Escola, M; Linares, C; Gomez-Gras, D; Medrano, A; Hereu, B	Assessing the effectiveness of restoration actions for Bryozoans: The case of the Mediterranean Pentapora fascialis	benthos, coastal, fishing, invertebrates, monitoring, recovery, recreation	League of European Research Universities - LERU; University of Barcelona; Consejo Superior de Investigaciones Cientificas (CSIC); CSIC - Centro Mediterraneo de Investigaciones Marinas y Ambientales (CMIMA); CSIC - Instituto de Ciencias del Mar (ICM)	2020	10.1002/aqc.3236	Environmental Sciences & Ecology; Marine & Freshwater Biology; Water Resources	2022-06-20	WOS:000497837100001
Yamindago, RIA	Restoring coastal ecosystems - a case study Malang and Gresik regency, Indonesia	Integrated restoration ecosystem, Partial least squarer, Analytical hierarchy process, Co-management	Brawijaya University	2015	10.1007/s11852-015-0373-0	Biodiversity & Conservation; Environmental Sciences & Ecology; Marine & Freshwater Biology; Water Resources	2022-06-20	WOS:000356537700002
Delevaux, JMS; Stamoulis, KA	Prioritizing forest management actions to benefit marine habitats in data-poor regions	coral reefs, decision-making, global data sets, habitat, ridge-to-reef, seagrass, sediment, water quality	Stanford University	2022	10.1111/cobi.13792	Biodiversity & Conservation; Environmental Sciences & Ecology	2022-06-20	WOS:000700953600001
Krumholz, J; Jadot, C	Demonstration of a New Technology for Restoration of Red Mangrove (Rhizophora mangle) in High-Energy Environments		University of Rhode Island	2009	10.4031/MTSJ.43.1.10	Engineering; Oceanography	2022-06-20	WOS:000265977400010
Kemink, KM; Adams, VM; Pressey, RL	Integrating dynamic processes into waterfowl conservation prioritization tools	biodiversity, conservation planning, Prairie Pothole Region, spatiotemporal, waterfowl	University of Tasmania	2021	10.1111/ddi.13218	Biodiversity & Conservation; Environmental Sciences & Ecology	2022-06-20	WOS:000603385800001
Sealey, KS; McDonough, VN; Lunz, KS	Coastal impact ranking of small islands for conservation, restoration and tourism development: A case study of The Bahamas		University of Miami; United States Department of the Interior; Florida Fish & Wildlife Conservation Commission	2014	10.1016/j.ocecoaman.2014.01.010	Oceanography; Water Resources	2022-06-20	WOS:000334087300011
Weisskoff, R; Sukop, MC; Nguyen, H; Glodzik, K	Forecasting Water Demands in South Florida in the Context of Everglades Restoration: Retrospective	Water demand forecasting, Population projections, Regional economic models, Everglades restoration, South Florida, Water conservation metric	University of Miami; State University System of Florida; Florida International University; Utah System of Higher Education; University of Utah; State University System of Florida; University of Florida	2020	10.1061/(ASCE)WR.1943-5452.0001213	Engineering; Water Resources	2022-06-20	WOS:000582481200014
Domanski, A; Laverty, AL	Ecosystem-Service Scaling Techniques to Evaluate the Benefits of Marine Debris Removal	Marine debris, Ecosystem services, Natural resource damage assessment, Habitat-based resource equivalency analysis, Habitat equivalency analysis, Resource equivalency analysis	National Oceanic Atmospheric Admin (NOAA) - USA	2022	10.1007/s00267-022-01636-5	Environmental Sciences & Ecology	2022-06-20	WOS:000776502200001
Cziesielski, MJ; Duarte, CM; Aalismail, N; Al-Hafedh, Y; Anton, A; Baalkhuyur, F; Baker, AC; Balke, T; Baums, IB; Berumen, M; Chalastani, VI; Cornwell, B; Daffonchio, D; Diele, K; Farooq, E; Gattuso, JP; He, S; Lovelock, CE; McLeod, E; Macreadie, PI; Marba, N; Martin, C; Muniz-Barreto, M; Kadinijappali, KP; Prihartato, P; Rabaoui, L; Saderne, V; Schmidt-Roach, S; Suggett, DJ; Sweet, M; Statton, J…	Investing in Blue Natural Capital to Secure a Future for the Red Sea Ecosystems	blue economy, Red Sea ecosystems, marine policy, sustainability, blue carbon, coral reefs, environmental policy	King Abdullah University of Science & Technology; King Abdullah University of Science & Technology; King Abdulaziz City for Science & Technology; University of Miami; University of Glasgow; Pennsylvania Commonwealth System of Higher Education (PCSHE); Pennsylvania State University; Pennsylvania State University - University Park; Stanford University; Edinburgh Napier University; Centre National d…	2021	10.3389/fmars.2020.603722	Environmental Sciences & Ecology; Marine & Freshwater Biology	2022-06-20	WOS:000612358500001
Bindhu, A; Maheswari, OU	Low contrast detection factor based contrast enhancement and restoration for underwater images	Contrast enhancement, HSV color space, Low Contrast Detection Factor (LCDF), Underwater image	Anna University; Anna University Chennai	2021		Oceanography	2022-06-20	WOS:000616375300001
Griffiths, SM; Taylor-Cox, ED; Behringer, DC; Butler, MJ; Preziosi, RF	Using genetics to inform restoration and predict resilience in declining populations of a keystone marine sponge	Caribbean, Conservation, Florida Keys, Loggerhead sponge, Porifera, Spheciospongia vesparium	Manchester Metropolitan University; University of Liverpool; State University System of Florida; University of Florida; State University System of Florida; University of Florida; Old Dominion University	2020	10.1007/s10531-020-01941-7	Biodiversity & Conservation; Environmental Sciences & Ecology	2022-06-20	WOS:000515327900014
Beck, MW; Marsh, TD; Reisewitz, SE; Bortman, ML	New tools for marine conservation: the leasing and ownership of submerged lands	concessions, Galveston Bay, Great South Bay, land acquisition, protected areas, Puget Sound, shellfish, submerged lands	Nature Conservancy; University of California System; University of California Santa Cruz; University of California System; University of California Santa Cruz	2004	10.1111/j.1523-1739.2004.00230.x	Biodiversity & Conservation; Environmental Sciences & Ecology	2022-06-20	WOS:000224071800007
McField, MD; Hallock, P; Jaap, WC	Multivariate analysis of reef community structure in the Belize barrier reef complex		State University System of Florida; University of South Florida	2001		Marine & Freshwater Biology; Oceanography	2022-06-20	WOS:000172609000039
Goreau, TJF; Prong, P	Biorock Electric Reefs Grow Back Severely Eroded Beaches in Months	beach restoration, erosion protection, corals, sea grass, reefs, Biorock electric technology, sea level rise, porous & permeable breakwaters, sand production, climate change		2017	10.3390/jmse5040048	Engineering; Oceanography	2022-06-20	WOS:000423694200004
Borneman, EH; Lowrie, J	Advances in captive husbandry and propagation: An easily utilized reef replenishment means from the private sector?			2001		Marine & Freshwater Biology; Oceanography	2022-06-20	WOS:000172609000050
Turicchia, E; Abbiati, M; Sweet, M; Ponti, M	Mass mortality hits gorgonian forests at Montecristo Island	Coral disease, Global climate change, Mediterranean Sea, Heat wave, Marine protected areas, Marine animal forests	University of Bologna; Marche Polytechnic University; University of Bologna; Consiglio Nazionale delle Ricerche (CNR); Istituto di Scienze Marine (ISMAR-CNR); University of Derby	2018	10.3354/dao03284	Fisheries; Veterinary Sciences	2022-06-20	WOS:000449164200008
Banerjee, P; Singh, VS; Singh, A; Prasad, RK; Rangarajan, R	Hydrochemical analysis to evaluate the seawater ingress in a small coral island of India	Island aquifer, Kalpeni, Salinity, Statistical analysis, Hydrochemistry, Aquifer quality management	Council of Scientific & Industrial Research (CSIR) - India; CSIR - National Geophysical Research Institute (NGRI); Council of Scientific & Industrial Research (CSIR) - India; CSIR - National Geophysical Research Institute (NGRI)	2012	10.1007/s10661-011-2234-0	Environmental Sciences & Ecology	2022-06-20	WOS:000303679400040
Pioch, S; Johnston, MW; Vaissiere, AC; Berger, F; Jacob, C; Dodge, R	An update of the Visual_HEA software to improve the implementation of the Habitat Equivalency Analysis method	Biophysical method, Ecological equivalency, Compensatory mitigation, Environmental liability	UDICE-French Research Universities; PSL Research University Paris; Ecole Pratique des Hautes Etudes (EPHE); Institut Agro; Montpellier SupAgro; CIRAD; Centre National de la Recherche Scientifique (CNRS); Institut de Recherche pour le Developpement (IRD); Universite Paul-Valery; Universite de Montpellier; Nova Southeastern University; Centre National de la Recherche Scientifique (CNRS); CNRS - Ins…	2017	10.1016/j.ecoleng.2017.05.008	Environmental Sciences & Ecology; Engineering	2022-06-20	WOS:000404305300030
Hylkema, A; Debrot, AO; Pistor, M; Postma, E; Williams, SM; Kitson-Walters, K	High peak settlement of Diadema antillarum on different artificial collectors in the Eastern Caribbean	Sea urchin settlement, St, Eustatius, Restoration, Assisted natural recovery, Saba	Wageningen University & Research; Wageningen University & Research; Wageningen University & Research; League of European Research Universities - LERU; Utrecht University; Royal Netherlands Institute for Sea Research (NIOZ)	2022	10.1016/j.jembe.2022.151693	Environmental Sciences & Ecology; Marine & Freshwater Biology	2022-06-20	WOS:000788144600002
Irving, AD; Tanner, JE; Seddon, S; Miller, D; Collings, GJ; Wear, RJ; Hoare, SL; Theil, MJ	Testing alternate ecological approaches to seagrass rehabilitation: links to life-history traits	Amphibolis antarctica, hessian, recruitment, restoration, seedling, transplant		2010	10.1111/j.1365-2664.2010.01852.x	Biodiversity & Conservation; Environmental Sciences & Ecology	2022-06-20	WOS:000281286800018
Waters, CG; Story, R; Costello, MJ	A methodology for recruiting a giant clam, Tridacna maxima, directly to natural substrata: A first step in reversing functional extinctions?	Bivalve, Marine, Restoration, Survival	University of Auckland; University of the South Pacific	2013	10.1016/j.biocon.2012.12.036	Biodiversity & Conservation; Environmental Sciences & Ecology	2022-06-20	WOS:000320684700003
Mateos-Molina, D; Scharer-Umpierre, MT; Appeldoorn, RS; Garcia-Charton, JA	Measuring the effectiveness of a Caribbean oceanic island no-take zone with an asymmetrical BACI approach	Reef fishes, No-take zones, Marine protected areas, BACI approach, Overfishing, Marine conservation, Isolation	University of Puerto Rico; University of Murcia	2014	10.1016/j.fishres.2013.09.017	Fisheries	2022-06-20	WOS:000329006300001
Rogers-Bennett, L; Yang, G; Mann, JD	Using the Resist-Accept-Direct management framework to respond to climate-driven transformations in marine ecosystems	climate change, regime shift, restoration, sea urchin barrens, tipping points	University of California System; University of California Davis; California State University System; California State Polytechnic University Pomona; California State University System; San Diego State University		10.1111/fme.12539	Fisheries	2022-06-20	WOS:000770661800001
Madin, EMP; Gaines, SD; Madin, JS; Link, AK; Lubchenco, PJ; Selden, RL; Warner, RR	Do Behavioral Foraging Responses of Prey to Predators Function Similarly in Restored and Pristine Foodwebs?		University of California System; University of California Santa Barbara; Macquarie University; University of California System; University of California Santa Barbara; University of California System; University of California Santa Barbara	2012	10.1371/journal.pone.0032390	Science & Technology - Other Topics	2022-06-20	WOS:000303017700047
Chen, YH; Shertzer, KW; Viehman, TS	Spatio-temporal dynamics of the threatened elkhorn coralAcropora palmata: Implications for conservation	Acropora palmata, elkhorn coral, endangered species, hierarchical Bayesian modelling, process-based model, species distribution modelling	National Academies of Sciences, Engineering & Medicine; National Oceanic Atmospheric Admin (NOAA) - USA; National Oceanic Atmospheric Admin (NOAA) - USA	2020	10.1111/ddi.13143	Biodiversity & Conservation; Environmental Sciences & Ecology	2022-06-20	WOS:000563621600001
Legare, B; Skomal, G; DeAngelis, B	Diel movements of the blacktip shark (Carcharhinus limbatus) in a Caribbean nursery	Blacktip shark, Acoustic telemetry, Nocturnal movement, Migration, Nursery habitat	University of the Virgin Islands	2018	10.1007/s10641-018-0755-x	Environmental Sciences & Ecology; Marine & Freshwater Biology	2022-06-20	WOS:000432321600011
Zelli, E; Quere, G; Lago, N; Di Franco, G; Costantini, F; Rossi, S; Bramanti, L	Settlement dynamics and recruitment responses of Mediterranean gorgonians larvae to different crustose coralline algae species		Centre National de la Recherche Scientifique (CNRS); UDICE-French Research Universities; League of European Research Universities - LERU; Sorbonne Universite; University of Bologna; University of Bologna; University of Salento; University of Palermo; Universidade Federal do Ceara	2020	10.1016/j.jembe.2020.151427	Environmental Sciences & Ecology; Marine & Freshwater Biology	2022-06-20	WOS:000562582100024
Stuart, CE; Wedding, LM; Pittman, SJ; Green, SJ	Habitat Suitability Modeling to Inform Seascape Connectivity Conservation and Management	habitat suitability modeling, seascape connectivity, seascape ecology, fish migrations, marine spatial planning, habitat restoration	University of Alberta; League of European Research Universities - LERU; University of Oxford	2021	10.3390/d13100465	Biodiversity & Conservation; Environmental Sciences & Ecology	2022-06-20	WOS:000711815600001
Einbinder, S; Perelberg, A; Ben-Shaprut, O; Foucart, MH; Shashar, N	Effects of artificial reefs on fish grazing in their vicinity: Evidence from algae presentation experiments	eilat, foraging, algae, herbivorous fish, artificial habitats, interaction, Red-Sea, rehabilitation	AgroParisTech; League of European Research Universities - LERU; UDICE-French Research Universities; Universite Paris Saclay; Hebrew University of Jerusalem	2006	10.1016/j.marenvres.2005.07.001	Environmental Sciences & Ecology; Marine & Freshwater Biology; Toxicology	2022-06-20	WOS:000234690100007
Bonin, MC; Harrison, HB; Williamson, DH; Frisch, AJ; Saenz-Agudelo, P; Berumen, ML; Jones, GP	The role of marine reserves in the replenishment of a locally impacted population of anemonefish on the Great Barrier Reef	conservation genetics, effective population size, habitat loss, larval connectivity, marine reserves, parentage analysis	James Cook University; James Cook University; Universidad Austral de Chile; King Abdullah University of Science & Technology	2016	10.1111/mec.13484	Biochemistry & Molecular Biology; Environmental Sciences & Ecology; Evolutionary Biology	2022-06-20	WOS:000369530000004
Xiao, R; Zhou, HL; Chen, CM; Cheng, HM; Li, HW; Xie, J; Zhao, HW; Han, Q; Diao, XP	Transcriptional responses of Acropora hyacinthus embryo under the benzo(a)pyrene stress by deep sequencing	Acropora hyacinthus embryo, Benzo(a)pyrene, Deep sequencing, Simple Sequence Repeats, Single nucleotide Polymorphisms	Hainan University; Hainan University; Hainan University; Chia Nan University of Pharmacy & Science; Hainan Normal University	2018	10.1016/j.chemosphere.2018.04.149	Environmental Sciences & Ecology	2022-06-20	WOS:000436215600044
Chen, XY; Gao, HW; Chen, ZH; Yao, XH; Sun, P	Assessing mismatches between ecosystem structure and function in Jiaozhou Bay by coordination degree algorithm	ecosystem coordination index, ecosystem health assessment, ecosystem restoration, Jiaozhou Bay	Ministry of Education, China; State Oceanic Administration	2017	10.1007/s11802-017-3173-3	Oceanography	2022-06-20	WOS:000396071600009
Zhai, L; Wang, X; Wang, P; Miralles-Wilhelm, F; Sternberg, LDL	Vegetation and location of water inflow affect evaporation in a subtropical wetland as indicated by the deuterium excess method	deuterium excess method, evaporation, isoscape, stable isotopes, vegetation	United States Department of Energy (DOE); Los Alamos National Laboratory; University of Miami; University of California System; University of California Los Angeles; University System of Maryland; University of Maryland College Park	2019	10.1002/eco.2082	Environmental Sciences & Ecology; Water Resources	2022-06-20	WOS:000477748700003
Hernawan, UE; Rahmawati, S; Ambo-Rappe, R; Sjafrie, NDM; Hadiyanto, H; Yusup, DS; Nugraha, AH; La Nafie, YA; Adi, W; Prayudha, B; Irawan, A; Rahayu, YP; Ningsih, E; Riniatsih, I; Supriyadi, IH; McMahon, K	The first nation-wide assessment identifies valuable blue-carbon seagrass habitat in Indonesia is in moderate condition	Ecological quality, Seagrass cover, Seagrass monitoring, Thalassia hempchii, Enhalus acoroides, Indonesia	Indonesian Institute of Sciences; Universitas Hasanuddin; Universitas Udayana; Indonesian Institute of Sciences; Ministry of Marine Affairs and Fisheries; Ministry of Environment & Forestry; Diponegoro University; Edith Cowan University; Murdoch University	2021	10.1016/j.scitotenv.2021.146818	Environmental Sciences & Ecology	2022-06-20	WOS:000655626900020
Darby, PC; DeAngelis, DL; Romanach, SS; Suir, K; Bridevaux, J	Modeling apple snail population dynamics on the Everglades landscape	Pomacea paludosa, Population matrix model, Distribution, Abundance, Florida, Wetlands, Hydrology, Management, Restoration, Snail kite	State University System of Florida; University of West Florida; United States Department of the Interior; United States Geological Survey; University of Miami; United States Department of the Interior; United States Geological Survey; United States Department of the Interior; United States Geological Survey	2015	10.1007/s10980-015-0205-5	Environmental Sciences & Ecology; Physical Geography; Geology	2022-06-20	WOS:000360673200011
Sakihara, TS; Nishiura, LK; Shimoda, TE; Shindo, TT; Nishimoto, RT	Brassy chubs Kyphosus vaigiensis display unexpected trans-island movement along inshore habitats	Kyphosidae, Inshore inter-habitat movements, Acoustic telemetry, Hawaiian shore fish		2015	10.1007/s10641-014-0245-8	Environmental Sciences & Ecology; Marine & Freshwater Biology	2022-06-20	WOS:000345625400014
Chakraborty, S; Majumdar, D; Sahoo, S; Saha, S	Assessment of future coastal risk zones along the Andaman coast to strengthen sustainable development	Coastal vulnerability, Community resilience, Representative concentration pathways (RCPs), AHP model, Viability	Indian Institute of Engineering Science Technology Shibpur (IIEST); Jadavpur University; Indian Institute of Technology System (IIT System); Indian Institute of Technology (IIT) - Guwahati; Jadavpur University	2021	10.1007/s12665-021-09940-9	Environmental Sciences & Ecology; Geology; Water Resources	2022-06-20	WOS:000695949500006
Rilov, G; Benayahu, Y	Fish assemblage on natural versus vertical artificial reefs: the rehabilitation perspective		Tel Aviv University; Tel Aviv University	2000	10.1007/s002279900250	Marine & Freshwater Biology	2022-06-20	WOS:000088186100019
Thurstan, RH; Diggles, B; Gillies, CL; Strong, MK; Kerkhove, R; Buckley, SM; King, RA; Smythe, V; Heller-Wagner, G; Weeks, R; Palin, F; McLeod, I	Charting two centuries of transformation in a coastal social-ecological system: A mixed methods approach	Cultural history, Environmental history, Historical ecology, Moreton Bay, Oyster, Shifting baseline syndrome	University of Exeter; University of Queensland; University of Queensland; University of Queensland; James Cook University; James Cook University	2020	10.1016/j.gloenvcha.2020.102058	Environmental Sciences & Ecology; Geography	2022-06-20	WOS:000527300300015
Gaff, H; DeAngelis, DL; Gross, LJ; Salinas, R; Shorrosh, M	A dynamic landscape model for fish in the Everglades and its application to restoration	everglades, spatially explicit model, freshwater marshes, fish, scenario evaluation	University of Tennessee System; University of Tennessee Knoxville; United States Department of the Interior; United States Geological Survey; University of Miami	2000	10.1016/S0304-3800(99)00202-1	Environmental Sciences & Ecology	2022-06-20	WOS:000085548500004
Stoeckl, N; Condie, S; Anthony, K	Assessing changes to ecosystem service values at large geographic scale: A case study for Australia's Great Barrier Reef	Non-market valuation, Benefit transfer, Ecosystem Services, Great Barrier Reef, Climate change, Adaptation, Damages avoided	University of Tasmania; Commonwealth Scientific & Industrial Research Organisation (CSIRO); Australian Institute of Marine Science	2021	10.1016/j.ecoser.2021.101352	Environmental Sciences & Ecology	2022-06-20	WOS:000703703700009
Thurstan, RH; McClenachan, L; Crowder, LB; Drew, JA; Kittinger, JN; Levin, PS; Roberts, CM; Pandolfi, JM	Filling historical data gaps to foster solutions in marine conservation	Coastal management, Fisheries, Historical ecology, Marine ecology, Qualitative data	University of Queensland; Colby College; Stanford University; Stanford University; Columbia University; Conservation International; National Oceanic Atmospheric Admin (NOAA) - USA; University of York - UK	2015	10.1016/j.ocecoaman.2015.04.019	Oceanography; Water Resources	2022-06-20	WOS:000364252300006
Butler, JRA; Wong, GY; Metcalfe, DJ; Honzak, M; Pert, PL; Rao, N; van Grieken, ME; Lawson, T; Bruce, C; Kroon, FJ; Brodie, JE	An analysis of trade-offs between multiple ecosystem services and stakeholders linked to land use and water quality management in the Great Barrier Reef, Australia	Biodiversity, Coral reef, Ecosystem services, Governance, Resilience, Scale mis-matches, Riparian vegetation, Social-ecological systems, Thresholds, Wetlands	Commonwealth Scientific & Industrial Research Organisation (CSIRO); Conservation International; Commonwealth Scientific & Industrial Research Organisation (CSIRO); Commonwealth Scientific & Industrial Research Organisation (CSIRO); James Cook University	2013	10.1016/j.agee.2011.08.017	Agriculture; Environmental Sciences & Ecology	2022-06-20	WOS:000329384600017
Marshell, A; Mills, JS; Rhodes, KL; McIlwain, J	Passive acoustic telemetry reveals highly variable home range and movement patterns among unicornfish within a marine reserve	Acoustic telemetry, Home range, Movement patterns, Marine reserves, Acanthuridae, Guam	University of Queensland; University of Guam; University of Hawaii System; University Hawaii Hilo	2011	10.1007/s00338-011-0770-2	Marine & Freshwater Biology	2022-06-20	WOS:000293536600009
Wang, T; Ozdamar, O; Bohorquez, J; Shen, Q; Cheour, M	Wiener filter deconvolution of overlapping evoked potentials	evoked potentials (EP), stimulus sequence, Wiener filtering, deconvolution, response overlapping, power spectrum estimation	University of Miami	2006	10.1016/j.jneumeth.2006.05.023	Biochemistry & Molecular Biology; Neurosciences & Neurology	2022-06-20	WOS:000242686600012
Lai, SH; Vemuri, BC	Efficient hybrid search for visual reconstruction problems	visual reconstruction, hybrid search algorithm, non-convex optimization, informed genetic algorithm	Siemens AG; State University System of Florida; University of Florida	1999	10.1016/S0262-8856(98)00088-2	Computer Science; Engineering; Optics	2022-06-20	WOS:000078681000004
Nobi, EP; Shivaprasad, A; Karikalan, R; Dilipan, E; Thangaradjou, T; Sivakumar, K	Microlevel Mapping of Coastal Geomorphology and Coastal Resources of Rameswaram Island, India: A Remote Sensing and GIS Perspective	Biodiversity, bioshield, corals, satellite data, Gulf of Mannar	Annamalai University; Council of Scientific & Industrial Research (CSIR) - India; CSIR - National Institute of Oceanography (NIO); Alagappa University	2010	10.2112/08-1119.1	Environmental Sciences & Ecology; Physical Geography; Geology	2022-06-20	WOS:000277947000004
Filbee-Dexter, K; Smajdor, A	Ethics of Assisted Evolution in Marine Conservation	assisted gene flow, translocation, genetic rescue, intervention, natural, climate change mitigation, adaptation, restoration	Institute of Marine Research - Norway; Norwegian Institute for Water Research (NIVA); University of Oslo	2019	10.3389/fmars.2019.00020	Environmental Sciences & Ecology; Marine & Freshwater Biology	2022-06-20	WOS:000457828300001
Christianen, MJA; van der Heide, T; Holthuijsen, SJ; van der Reijden, KJ; Borst, ACW; Olff, H	Biodiversity and food web indicators of community recovery in intertidal shellfish reefs	Trophic interactions, Facilitation, Ecological networks, Foundation species, Habitat modification, Biodiversity	University of Groningen; Radboud University Nijmegen; League of European Research Universities - LERU; Utrecht University; Royal Netherlands Institute for Sea Research (NIOZ)	2017	10.1016/j.biocon.2016.09.028	Biodiversity & Conservation; Environmental Sciences & Ecology	2022-06-20	WOS:000410011900009
Spalding, MD; Ruffo, S; Lacambra, C; Meliane, I; Hale, LZ; Shepard, CC; Beck, MW	The role of ecosystems in coastal protection: Adapting to climate change and coastal hazards		League of European Research Universities - LERU; University of Cambridge; League of European Research Universities - LERU; University of Cambridge; Nature Conservancy; League of European Research Universities - LERU; University of Cambridge; Nature Conservancy; University of California System; University of California Santa Cruz	2014	10.1016/j.ocecoaman.2013.09.007	Oceanography; Water Resources	2022-06-20	WOS:000335877100006
Adams, AJ; Rehage, JS; Cooke, SJ	A multi-methods approach supports the effective management and conservation of coastal marine recreational flats fisheries	Marine fish conservation, Habitat, Albula vulpes, Megalops atlanticus, Trachinotus falcatus, Connectivity	Harbor Branch Oceanographic Institute Foundation; State University System of Florida; Florida Atlantic University; State University System of Florida; Florida International University; Carleton University	2019	10.1007/s10641-018-0840-1	Environmental Sciences & Ecology; Marine & Freshwater Biology	2022-06-20	WOS:000458239300001
Pittman, SJ; Yates, KL; Bouchet, PJ; Alvarez-Berastegui, D; Andrefouet, S; Bell, SS; Berkstrom, C; Bostrom, C; Brown, CJ; Connolly, RM; Devillers, R; Eggleston, D; Gilby, BL; Gullstrom, M; Halpern, BS; Hidalgo, M; Holstein, D; Hovel, K; Huettmann, F; Jackson, EL; James, WR; Kellner, JB; Kot, CY; Lecours, V; Lepczyk, C; Nagelkerken, I; Nelson, J; Olds, AD; Santos, RO; Scales, KL; Schneider, DC; Sc…	Seascape ecology: identifying research priorities for an emerging ocean sustainability science	Research priorities, Ecosystem-based management, Sustainability science, Connectivity, Restoration, Spatial patterns	League of European Research Universities - LERU; University of Oxford; University of Salford; University of St Andrews; University of St Andrews; Ifremer; Institut de Recherche pour le Developpement (IRD); Universite Nouvelle Caledonie; Swedish University of Agricultural Sciences; Stockholm University; Abo Akademi University; Dalhousie University; Griffith University; Institut de Recherche pour l…	2021	10.3354/meps13661	Environmental Sciences & Ecology; Marine & Freshwater Biology; Oceanography	2022-06-20	WOS:000644439200001
Wu, YW; Kameshwar, AKS; Zhang, B; Chen, FF; Qin, WS; Meng, MJ; Zhang, JC	Genome and transcriptome analysis of rock-dissolving Pseudomonas sp. NLX-4 strain	Rock mining, Ecological restoration, Silicate rock-dissolution, Pseudomonas sp. NLX-4 strain, Genome sequencing, Transcriptome sequencing	Nanjing Forestry University; Lakehead University; University of Miami	2022	10.1186/s40643-022-00548-w	Biotechnology & Applied Microbiology	2022-06-20	WOS:000804777000001
Pilnick, AR; O'Neil, KL; Moe, M; Patterson, JT	A novel system for intensive Diadema antillarum propagation as a step towards population enhancement		State University System of Florida; University of Florida; State University System of Florida; University of Florida	2021	10.1038/s41598-021-90564-1	Science & Technology - Other Topics	2022-06-20	WOS:000658391200074
Trianni, MS	Life history characteristics and stock status of the thumbprint emperor (Lethrinus harak) in Saipan Lagoon		National Oceanic Atmospheric Admin (NOAA) - USA	2016	10.7755/FB.114.4.4	Fisheries	2022-06-20	WOS:000390143700004
Selin, NI; Latypov, YY	Size and age composition of Tridacna crocea Lamarck, 1819 (Bivalvia: Tridacnidae) in coastal waters of islands of the Con Dao Archipelago in the South China Sea		Russian Academy of Sciences; National Scientific Center of Marine Biology, Far East Branch of the Russian Academy of Sciences	2011		Marine & Freshwater Biology	2022-06-20	WOS:000209676200007
Bostrom, C; Pittman, SJ; Simenstad, C; Kneib, RT	Seascape ecology of coastal biogenic habitats: advances, gaps, and challenges	Landscape ecology, Seascape, Fragmentation, Scale, Edge effects, Patch size, Thresholds, Connectivity	Abo Akademi University; National Oceanic Atmospheric Admin (NOAA) - USA; University of the Virgin Islands; University of Washington; University of Washington Seattle; University System of Georgia; University of Georgia	2011	10.3354/meps09051	Environmental Sciences & Ecology; Marine & Freshwater Biology; Oceanography	2022-06-20	WOS:000289489800016
Giddens, JL; Wiggins, C; Friedlander, AM; Conklin, EJ; Stamoulis, KA; Minton, D	Assemblage-level effects of the introduced peacock hind (Cephalopholis argus) on Hawaiian reef fishes	Introduced species, Predator removal experiment, Mesopredator, Doomed surplus, Biotic resistance, Hawaii	University of Hawaii System; National Geographic Society; Curtin University	2018	10.1007/s10641-017-0697-8	Environmental Sciences & Ecology; Marine & Freshwater Biology	2022-06-20	WOS:000419982600007
Howell, HJ; Delgado, GL; Wood, AC; Thompson, LM; Cline, EA; Searcy, CA	A dry future for the Everglades favors invasive herpetofauna	Hydrology, Restoration, Habitat management, Macrocosms, South Florida	University of Miami; South Florida Water Management District	2021	10.1007/s10530-021-02562-z	Biodiversity & Conservation; Environmental Sciences & Ecology	2022-06-20	WOS:000650120300005
Montes, E; Djurhuus, A; Muller-Karger, FE; Otis, D; Kelble, CR; Kavanaugh, MT	Dynamic Satellite Seascapes as a Biogeographic Framework for Understanding Phytoplankton Assemblages in the Florida Keys National Marine Sanctuary, United States	Marine Biodiversity Observation Network, Florida Keys National Marine Sanctuary, biogeographic seascapes, phytoplankton functional types, phytoplankton pigment analysis, HPLC, CHEMTAX, bio-optics	State University System of Florida; University of South Florida; University of the Faroe Islands; National Oceanic Atmospheric Admin (NOAA) - USA; Atlantic Oceanographic & Meteorological Laboratory (AOML); Oregon State University	2020	10.3389/fmars.2020.00575	Environmental Sciences & Ecology; Marine & Freshwater Biology	2022-06-20	WOS:000550285100001
Lirman, D; Deangelo, G; Serafy, JE; Hazra, A; Hazra, DS; Brown, A	Geospatial video monitoring of nearshore benthic habitats of western Biscayne Bay (Florida) using the shallow-water positioning system (SWaPS)	geospatial video surveys, salinity patterns, seagrass distribution, Everglades restoration	University of Miami; National Oceanic Atmospheric Admin (NOAA) - USA; National Geodetic Survey, NOAA; National Oceanic Atmospheric Admin (NOAA) - USA; University of Miami	2008	10.2112/04-0428.1	Environmental Sciences & Ecology; Physical Geography; Geology	2022-06-20	WOS:000252701100014
Lan, CH; Hsui, CY	The deployment of artificial reef ecosystem: Modelling, simulation and application	artificial reef communities, fractal dimension, spatial configuration, complexity, decision support system	Nanhua University	2006	10.1016/j.simpat.2005.10.011	Computer Science	2022-06-20	WOS:000238899200013
Xu, LH; Zdechlik, MC; Smith, MC; Rayamajhi, MB; DeAngelis, DL; Zhang, B	SIMULATION OF POST-HURRICANE IMPACT ON INVASIVE SPECIES WITH BIOLOGICAL CONTROL MANAGEMENT	Invasive plant species management, stand structure, size-structured matrix model, post-hurricane recovery, biocontrol effect	University of Miami; United States Department of Agriculture (USDA); United States Department of the Interior; United States Geological Survey; University of California System; University of California Davis	2020	10.3934/dcds.2020038	Mathematics	2022-06-20	WOS:000519540200046
Enchelmaier, AC; Babcock, EA; Hammerschlag, N	Survey of fishes within a restored mangrove habitat of a subtropical bay		University of Miami	2020	10.1016/j.ecss.2018.11.009	Marine & Freshwater Biology; Oceanography	2022-06-20	WOS:000577973600004
Robert, K; Huvenne, VAI; Georgiopoulou, A; Jones, DOB; Marsh, L; Carter, GDO; Chaumillon, L	New approaches to high-resolution mapping of marine vertical structures		NERC National Oceanography Centre; University of Southampton; University College Dublin; University College Dublin; University of Southampton; UK Research & Innovation (UKRI); Natural Environment Research Council (NERC); NERC British Geological Survey	2017	10.1038/s41598-017-09382-z	Science & Technology - Other Topics	2022-06-20	WOS:000408107000139
Layman, CA; Arrington, DA; Kramer, PA; Valentine-Rose, L; Dahlgren, CP	Indicator Taxa to Assess Anthropogenic Impacts in Caribbean and Bahamas Tidal Creeks	Connectivity, corridor, ecosystem fragmentation, fish, Index of Biotic Integrity, mangrove, nursery, ontogenetic migration	State University System of Florida; Florida International University	2010		Biodiversity & Conservation	2022-06-20	WOS:000291902300002
Zografos, KG; Douligeris, C; Tsoumpas, P	An integrated framework for managing emergency-response logistics: The case of the electric utility companies	decision support systems, electric utility restoration, emergency management, emergency response operations, information technologies	Athens University of Economics & Business; University of Miami	1998	10.1109/17.669744	Business & Economics; Engineering	2022-06-20	WOS:000073176400003
Liu, C; Liu, GY; Yang, Q; Luo, TY; He, P; Franzese, PP; Lombardi, GV	Emergy-based evaluation of world coastal ecosystem services	Coastal ecosystem, Ecosystem service, Emergy analysis, Non-monetary accounting	Beijing Normal University; Guangdong University of Technology; Chinese Research Academy of Environmental Sciences; Parthenope University Naples; University of Florence	2021	10.1016/j.watres.2021.117656	Engineering; Environmental Sciences & Ecology; Water Resources	2022-06-20	WOS:000700770700002
Osorio-Cano, JD; Alcerreca-Huerta, JC; Marino-Tapia, I; Osorio, AF; Acevedo-Ramirez, C; Enriquez, C; Costa, M; Pereira, P; Mendoza, E; Escudero, M; Astorga-Moar, A; Lopez-Gonzalez, J; Appendini, CM; Silva, R; Oumeraci, H	Effects of Roughness Loss on Reef Hydrodynamics and Coastal Protection: Approaches in Latin America	Coral reefs, Reef roughness, Ecosystem services, Coastal protection, Wave damping, Numerical modelling	Universidad Nacional de Colombia; El Colegio de la Frontera Sur (ECOSUR); CINVESTAV - Centro de Investigacion y de Estudios Avanzados del Instituto Politecnico Nacional; Universidad Nacional Autonoma de Mexico; Universidade de Sao Paulo; Universidad Nacional Autonoma de Mexico; Universidad Nacional Autonoma de Mexico; Braunschweig University of Technology	2019	10.1007/s12237-019-00584-4	Environmental Sciences & Ecology; Marine & Freshwater Biology	2022-06-20	WOS:000489866500004
Rowell, TJ; Scharer, MT; Appeldoorn, RS; Nemeth, MI; Mann, DA; Rivera, JA	Sound production as an indicator of red hind density at a spawning aggregation	Epinephelus guttatus, Passive acoustics, Reproduction, Behavior, Fishery management, Puerto Rico, Abrir la Sierra, Marine protected areas	University of Puerto Rico; University of Puerto Rico Mayaguez; State University System of Florida; University of South Florida; National Oceanic Atmospheric Admin (NOAA) - USA	2012	10.3354/meps09839	Environmental Sciences & Ecology; Marine & Freshwater Biology; Oceanography	2022-06-20	WOS:000307723300019
Trianni, MS; Tenorio, MC	GROSS DIET COMPOSITION AND TROPHIC LEVEL ESTIMATION OF THE SPOTCHEEK EMPEROR, LETHRINUS RUBRIOPERCULATUS (ACTINOPTERYGII: PERCIFORMES: LETHRINIDAE), IN THE COMMONWEALTH OF THE NORTHERN MARIANA ISLANDS, MICRONESIA	Lethrinus rubrioperculatus, diet composition, Northern Mariana Islands, trophic level		2012	10.3750/AIP2011.42.2.02	Fisheries; Zoology	2022-06-20	WOS:000306077300002
Andrews, AH; DeMartini, EE; Eble, JA; Taylor, BM; Lou, DC; Humphreys, RL	Age and growth of bluespine unicornfish (Naso unicornis): a half-century life-span for a keystone browser, with a novel approach to bomb radiocarbon dating in the Hawaiian Islands		National Oceanic Atmospheric Admin (NOAA) - USA; State University System of Florida; University of West Florida; University of Hawaii System; James Cook University	2016	10.1139/cjfas-2016-0019	Fisheries; Marine & Freshwater Biology	2022-06-20	WOS:000383779500012
Pascarella, JB; Waddington, KD; Neal, PR	Non-apoid flower-visiting fauna of everglades National Park, Florida	biodiversity, Everglades National Park, Florida, pollinators, Syrphidae	University of Miami	2001	10.1023/A:1016688627518	Biodiversity & Conservation; Environmental Sciences & Ecology	2022-06-20	WOS:000168327400006
Bailhache, R; Acharya, S; Acosta, FT; Adamova, D; Adolfsson, J; Aggarwal, MM; Rinella, GA; Agnello, M; Agrawal, N; Ahammed, Z; Ahn, SU; Aiola, S; Akindinov, A; Al-Turany, M; Alam, SN; Albuquerque, DSD; Aleksandrov, D; Alessandro, B; Molina, RA; Ali, Y; Alici, A; Alkin, A; Alme, J; Alt, T; Altenkamper, L; Altsybeev, I; Anaam, MN; Andrei, C; Andreou, D; Andrews, HA; Andronic, A; Angeletti, M; Angue…	Dielectron measurements in pp and Pb-Pb colllisions with ALICE at the LHC	Heavy-ion collisions, Electromagnetic probes, Heavy-flavour production, ALICE	League of European Research Universities - LERU; Utrecht University; Goethe University Frankfurt; Yerevan Physics Institute; National Academy of Sciences Ukraine; Bogolyubov Institute for Theoretical Physics; Department of Science & Technology (India); Bose Institute; Department of Science & Technology (India); Bose Institute; Russian Academy of Sciences; Budker Institute of Nuclear Physics; Cali…	2019	10.1016/j.nuclphysa.2018.10.021	Physics	2022-06-20	WOS:000457515500180
Cooke, SJ; Madliger, CL; Cramp, RL; Beardall, J; Burness, G; Chown, SL; Clark, TD; Dantzer, B; de la Barrera, E; Fangue, NA; Franklin, CE; Fuller, A; Hawkes, LA; Hultine, KR; Hunt, KE; Love, OP; MacMillan, HA; Mandelman, J; Mark, FC; Martin, LB; Newman, AEM; Nicotra, AB; Robinson, SA; Ropert-Coudert, Y; Rummer, JL; Seebacher, F; Todgham, AE	Reframing conservation physiology to be more inclusive, integrative, relevant and forward-looking: reflections and a horizon scan	conservation physiology, horizon scan, evidence, Sustainable Development Goals	Carleton University; Carleton University; University of Queensland; Monash University; Trent University; Deakin University; University of Michigan System; University of Michigan; Universidad Nacional Autonoma de Mexico; University of California System; University of California Davis; University of Witwatersrand; University of Exeter; George Mason University; University of Windsor; Carleton Univer…	2020	10.1093/conphys/coaa016	Biodiversity & Conservation; Environmental Sciences & Ecology; Physiology	2022-06-20	WOS:000527699400001
Komyakova, V; Chamberlain, D; Jones, GP; Swearer, SE	Assessing the performance of artificial reefs as substitute habitat for temperate reef fishes: Implications for reef design and placement	Artificial habitat, Anthropogenic impacts, Ecological engineering, Green engineering, Management	University of Melbourne; University of Sydney; James Cook University	2019	10.1016/j.scitotenv.2019.02.357	Environmental Sciences & Ecology	2022-06-20	WOS:000462776800015
Bernhardt, SP; Griffing, LR	An evaluation of image analysis at benthic sites based on color segmentation		Texas A&M University System; Texas A&M University College Station	2001		Marine & Freshwater Biology; Oceanography	2022-06-20	WOS:000172609000034
Andrews, AH; Leaf, RT; Rogers-Bennett, L; Neuman, M; Hawk, H; Cailliet, GM	Bomb radiocarbon dating of the endangered white abalone (Haliotis sorenseni): investigations of age, growth and lifespan	age validation, carbon-14, Haliotidae, longevity, Mollusca, Southern California Bight	National Oceanic Atmospheric Admin (NOAA) - USA; University of Southern Mississippi; National Oceanic Atmospheric Admin (NOAA) - USA; Laval University; Moss Landing Marine Laboratories	2013	10.1071/MF13007	Fisheries; Marine & Freshwater Biology; Oceanography	2022-06-20	WOS:000326166400004
Soto, PA; Vence, M; Pinero, GM; Coral, DF; Usach, V; Muraca, D; Cueto, A; Roig, A; van Raap, MBF; Setton-Avruj, CP	Sciatic nerve regeneration after traumatic injury using magnetic targeted adipose-derived mesenchymal stem cells	Nanomedicine, Stem cells, Magnetic targeting, Sciatic nerve, Remyelination	University of Buenos Aires; Consejo Nacional de Investigaciones Cientificas y Tecnicas (CONICET); Consejo Nacional de Investigaciones Cientificas y Tecnicas (CONICET); National University of La Plata; Universidade Estadual de Campinas; University of Buenos Aires; Consejo Superior de Investigaciones Cientificas (CSIC); CSIC - Instituto de Ciencia de Materiales de Barcelona (ICMAB)	2021	10.1016/j.actbio.2021.05.050	Engineering; Materials Science	2022-06-20	WOS:000677503800005
Santos, RO; Rehage, JS; Adams, AJ; Black, BD; Osborne, J; Kroloff, EKN	Quantitative assessment of a data-limited recreational bonefish fishery using a time-series of fishing guides reports		State University System of Florida; Florida International University; State University System of Florida; Florida International University	2017	10.1371/journal.pone.0184776	Science & Technology - Other Topics	2022-06-20	WOS:000410243200022
Ainsworth, CH; Chassignet, EP; French-McCay, D; Beegle-Krause, CJ; Berenshtein, I; Englehardt, J; Fiddaman, T; Huang, H; Huettel, M; Justic, D; Kourafalou, VH; Liu, Y; Mauritzen, C; Murawski, S; Morey, S; Ozgokmen, T; Paris, CB; Ruzicka, J; Saul, S; Shepherd, J; Socolofsky, S; Gabriele, HS; Sutton, T; Weisberg, RH; Wilson, C; Zheng, L; Zheng, Y	Ten years of modeling the Deepwater Horizon oil spill	Oil spill, Deepwater horizon, Oil transport and fate, Ecosystem, Socioeconomic, Numerical modeling	State University System of Florida; University of South Florida; State University System of Florida; Florida State University; SINTEF; University of Miami; University of Miami; State University System of Florida; Florida State University; Louisiana State University System; Louisiana State University; Norwegian Meteorological Institute; State University System of Florida; Florida A&M University; N…	2021	10.1016/j.envsoft.2021.105070	Computer Science; Engineering; Environmental Sciences & Ecology; Water Resources	2022-06-20	WOS:000659355900005
Blaber, SJM	Fishes and fisheries in tropical estuaries: The last 10 years	fishes, fisheries, paradigms, tropical estuaries	Commonwealth Scientific & Industrial Research Organisation (CSIRO)	2013	10.1016/j.ecss.2012.11.002	Marine & Freshwater Biology; Oceanography	2022-06-20	WOS:000328871300007
Ellis, RD; Flaherty-Walia, KE; Collins, AB; Bickford, JW; Boucek, R; Burnsed, SLW; Lowerre-Barbieri, SK	Acoustic telemetry array evolution: From species- and project-specific designs to large-scale, multispecies, cooperative networks	Acoustic telemetry, Movement, Artificial reef, Gulf of Mexico, Grouper, Red drum	Florida Fish & Wildlife Conservation Commission; State University System of Florida; University of Florida; State University System of Florida; University of Florida	2019	10.1016/j.fishres.2018.09.015	Fisheries	2022-06-20	WOS:000451654100018
Yasue, M; Nellas, A; Vincent, ACJ	Seahorses helped drive creation of marine protected areas, so what did these protected areas do for the seahorses?	community-based conservation, conservation effectiveness, fishers, flagship species, Hippocampus spp., marine protected areas, Philippines, seahorses	University of British Columbia	2012	10.1017/S0376892911000622	Biodiversity & Conservation; Environmental Sciences & Ecology	2022-06-20	WOS:000303605800009
Parsons, DM; Buckthought, D; Middleton, C; MacKay, G	Relative abundance of snapper (Chrysophrys auratus) across habitats within an estuarine system	Estuarine nursery habitat, juvenile fish, ontogeny, Pagrus, relative abundance, seagrass		2016	10.1080/00288330.2016.1146310	Fisheries; Marine & Freshwater Biology; Oceanography	2022-06-20	WOS:000383022000003
Babcock, RC; Shears, NT; Alcala, AC; Barrett, NS; Edgar, GJ; Lafferty, KD; McClanahan, TR; Russ, GR	Decadal trends in marine reserves reveal differential rates of change in direct and indirect effects	fishing effects, interactions, time lags, trophic cascade, marine protected area	James Cook University; James Cook University; United States Department of the Interior; United States Geological Survey; University of California System; University of California Santa Barbara; Wildlife Conservation Society; Commonwealth Scientific & Industrial Research Organisation (CSIRO); University of Tasmania; Silliman University	2010	10.1073/pnas.0908012107	Science & Technology - Other Topics	2022-06-20	WOS:000283677400010
Chandrasekar, S; Lazarus, S; Chandran, R; Nisha, JC; Rajan, GC; Satyanarayana, C	In situ observations increase the diversity records of Rocky-reef inhabiting Echinoderms along the South West Coast of India	Rocky reefs, Echinoderms, West Coast of India	Zoological survey of India	2019		Oceanography	2022-06-20	WOS:000498632800006
Cooke, SJ; Bergman, JN; Madliger, CL; Cramp, RL; Beardall, J; Burness, G; Clark, TD; Dantzer, B; de la Barrera, E; Fangue, NA; Franklin, CE; Fuller, A; Hawkes, LA; Hultine, KR; Hunt, KE; Love, OP; MacMillan, HA; Mandelman, JW; Mark, FC; Martin, LB; Newman, AEM; Nicotra, AB; Raby, GD; Robinson, SA; Ropert-Coudert, Y; Rummer, JL; Seebacher, F; Todgham, AE; Tomlinson, S; Chown, SL	One hundred research questions in conservation physiology for generating actionable evidence to inform conservation policy and practice	Biodiversity threats, conservation decisions, conservation physiology, evidence, research questions	Carleton University; Carleton University; University of Queensland; Monash University; Trent University; Deakin University; Universidad Nacional Autonoma de Mexico; University of California System; University of California Davis; University of Witwatersrand; University of Exeter; Smithsonian Institution; University of Windsor; Carleton University; Helmholtz Association; Alfred Wegener Institute, …	2021	10.1093/conphys/coab009	Biodiversity & Conservation; Environmental Sciences & Ecology; Physiology	2022-06-20	WOS:000644634400001
Viana, IG; Siriwardane-de Zoysa, R; Willette, DA; Gillis, LG	Exploring how non-native seagrass species could provide essential ecosystems services: a perspective on the highly invasive seagrass Halophila stipulacea in the Caribbean Sea	Halophila stipulacea, Caribbean Sea, Pioneer species, Functional traits, Facilitative interactions	Universidade do Porto; Universidade de Vigo; Loyola Marymount University	2019	10.1007/s10530-019-01924-y	Biodiversity & Conservation; Environmental Sciences & Ecology	2022-06-20	WOS:000465867500002
Bartley, R; Wilkinson, SN; Hawdon, AA; Abbott, BN; Post, DA	Impacts of improved grazing land management on sediment yields. Part 2: Catchment response	Great Barrier Reef, Erosion, Vegetation, Grazing, Runoff, Sediment	Commonwealth Scientific & Industrial Research Organisation (CSIRO); Commonwealth Scientific & Industrial Research Organisation (CSIRO); Commonwealth Scientific & Industrial Research Organisation (CSIRO)	2010	10.1016/j.jhydrol.2010.06.014	Engineering; Geology; Water Resources	2022-06-20	WOS:000280976600002
Eriksson, H; Adhuri, DS; Adrianto, L; Andrew, NL; Apriliani, T; Daw, T; Evans, L; Garces, L; Kamanyi, E; Mwaipopo, R; Purnomo, AH; Sulu, RJ; Beare, DJ	An ecosystem approach to small-scale fisheries through participatory diagnosis in four tropical countries	Ecosystem Approach to Fisheries, Fishery management, Governance, Participatory framework, Stakeholders, Transformation	CGIAR; Worldfish; University of Wollongong; Indonesian Institute of Sciences; Bogor Agricultural University; Ministry of Marine Affairs and Fisheries; Stockholm University; University of Exeter; James Cook University; CGIAR; Worldfish; University of Dar es Salaam; Ministry of Marine Affairs and Fisheries; CGIAR; Worldfish	2016	10.1016/j.gloenvcha.2015.11.005	Environmental Sciences & Ecology; Geography	2022-06-20	WOS:000370992100006
Bradley, M; Baker, R; Nagelkerken, I; Sheaves, M	Context is more important than habitat type in determining use by juvenile fish	Habitat, Function, Nursery role, Ecological context, Environmental setting, Coastal ecosystem, Juvenile fish, Underwater video	James Cook University; James Cook University; University of South Alabama; University of Adelaide; University of Adelaide	2019	10.1007/s10980-019-00781-3	Environmental Sciences & Ecology; Physical Geography; Geology	2022-06-20	WOS:000462018500014
Subedi, SC; Allen, P; Vidales, R; Sternberg, L; Ross, M; Afkhami, ME	Salinity legacy: Foliar microbiome's history affects mutualist-conferred salinity tolerance	endophytes, Everglades, legacy effects, mangroves, mutualism, salinity legacy, salt tolerance, sea level rise	University of Miami; State University System of Florida; Florida International University; State University System of Florida; Florida International University; Arkansas Tech University	2022	10.1002/ecy.3679	Environmental Sciences & Ecology	2022-06-20	WOS:000781913800001
Surge, DM; Lohmann, KC; Goodfriend, GA	Reconstructing estuarine conditions: oyster shells as recorders of environmental change, Southwest Florida	Crassostrea virginica, stable isotopes., sclerochronology, ecology, radiocarbon, amino acid geochronology, taphonomy, Florida	George Washington University; University of Michigan System; University of Michigan	2003	10.1016/S0272-7714(02)00370-0	Marine & Freshwater Biology; Oceanography	2022-06-20	WOS:000185453500002
MacMillan, H; Moore, AB; Auge, AA; Chilvers, BL	GIS-based multi-criteria analysis of breeding habitats for recolonising species: New Zealand sea lions	Spatial analysis, Environmental management, Phocarctos hookeri, Analytical hierarchy process, Geographic information systems, Habitat suitability	University of Otago; James Cook University; Massey University	2016	10.1016/j.ocecoaman.2016.06.008	Oceanography; Water Resources	2022-06-20	WOS:000381837700016
Crosson, S; Hibbert, L	Integrating Commercial Fisheries Registration, Education, and Social Science in the US Virgin Islands		National Oceanic Atmospheric Admin (NOAA) - USA; National Oceanic Atmospheric Admin (NOAA) - USA	2017	10.1080/02755947.2016.1264505	Fisheries	2022-06-20	WOS:000399562800009
Fishelson, L; Bresler, V; Abelson, A; Stone, L; Gefen, E; Rosenfeld, M; Mokady, O	The two sides of man-induced changes in littoral marine communities: Eastern Mediterranean and the Red Sea as an example	Red Sea, Mediterranean Sea, molluscs, pollution, phenotypic alterations	Tel Aviv University; Tel Aviv University	2002	10.1016/S0048-9697(02)00066-9	Environmental Sciences & Ecology	2022-06-20	WOS:000178921800010
Hamman, E; Brodie, J; Eberhard, R; Deane, F; Bode, M	Regulating land use in the catchment of the Great Barrier Reef	Great Barrier Reef, Regulation, Diffuse pollution, Runoff, Nutrients, Water quality	Queensland University of Technology (QUT); James Cook University; James Cook University; Queensland University of Technology (QUT); Queensland University of Technology (QUT)	2022	10.1016/j.lusepol.2022.106001	Environmental Sciences & Ecology	2022-06-20	WOS:000784248900002
Wehmiller, JF; Brothers, LL; Ramsey, KW; Foster, DS; Mattheus, CR; Hein, CJ; Shawler, JL	Molluscan aminostratigraphy of the US Mid-Atlantic Quaternary coastal system: Implications for onshore-offshore correlation, paleochannel and barrier island evolution, and local late Quaternary sea-level history	Quaternary sea-level, Delmarva peninsula, US Mid-Atlantic shelf, Paleovalley, Amino acid racemization, Geochronology, Age-mixing, Seismic stratigraphy, Mollusks	University of Delaware; United States Department of the Interior; United States Geological Survey; University of Delaware; William & Mary; Virginia Institute of Marine Science	2021	10.1016/j.quageo.2021.101177	Physical Geography; Geology	2022-06-20	WOS:000696783400001
Januchowski-Hartley, S; VanDerWal, J; Sydes, D	Effective Control of Aquatic Invasive Species in Tropical Australia	Abundance, Ecological niche model, Environmental suitability, Hymenachne amplexicaulis, Linear quantile regression, Management effectiveness	James Cook University; James Cook University	2011	10.1007/s00267-011-9686-4	Environmental Sciences & Ecology	2022-06-20	WOS:000293636400016
Shiffman, DS; Frazier, BS; Kucklick, JR; Abel, D; Brandes, J; Sancho, G	Feeding Ecology of the Sandbar Shark in South Carolina Estuaries Revealed through delta C-13 and delta N-15 Stable Isotope Analysis		College of Charleston; University of Miami; National Institute of Standards & Technology (NIST) - USA; Coastal Carolina University; University System of Georgia; University of Georgia; Skidaway Institute of Oceanography	2014	10.1080/19425120.2014.920742	Fisheries; Marine & Freshwater Biology	2022-06-20	WOS:000343697600013
Rau, GH; McLeod, EL; Hoegh-Guldberg, O	The need for new ocean conservation strategies in a high-carbon dioxide world		University of California System; University of California Santa Cruz; United States Department of Energy (DOE); Lawrence Livermore National Laboratory; University of Queensland	2012	10.1038/NCLIMATE1555	Environmental Sciences & Ecology; Meteorology & Atmospheric Sciences	2022-06-20	WOS:000310104100008
Naylor, LA	The contributions of biogeomorphology to the emerging field of geobiology	biogeomorphology, geobiology, biocomplexity, bioconstruction, interdisciplinary approaches, ecosystem engineers	League of European Research Universities - LERU; University of Oxford	2005	10.1016/j.palaeo.2004.10.013	Physical Geography; Geology; Paleontology	2022-06-20	WOS:000228594400004
Hahladakis, JN; Stylianos, M; Gidarakos, E	Assessment of released heavy metals from electrical and electronic equipment (EEE) existing in shipwrecks through laboratory-scale simulation reactor	Recycling, Ship, WEEE, Heavy metals, Simulation reactor	Technical University of Crete	2013	10.1016/j.jhazmat.2013.02.005	Engineering; Environmental Sciences & Ecology	2022-06-20	WOS:000317878400032
Manson, FJ; Loneragan, NR; Skilleter, GA; Phinn, SR	An evaluation of the evidence for linkages between mangroves and fisheries: A synthesis of the literature and identification of research directions		University of Queensland; Commonwealth Scientific & Industrial Research Organisation (CSIRO); University of Queensland	2005		Marine & Freshwater Biology; Oceanography	2022-06-20	WOS:000232951200010
Cianciotto, AC; Shenker, JM; Adams, AJ; Rennert, JJ; Heuberger, D	Modifying mosquito impoundment management to enhance nursery habitat value for juvenile common Snook (Centropomus undecimalis) and Atlantic tarpon (Megalops atlanticus)	Snook, Tarpon, Nursery, Habitat, Impoundment, Emigration	Harbor Branch Oceanographic Institute Foundation; State University System of Florida; Florida Atlantic University; Florida Institute of Technology	2019	10.1007/s10641-018-0838-8	Environmental Sciences & Ecology; Marine & Freshwater Biology	2022-06-20	WOS:000458239300021
Mooij, WM; Trolle, D; Jeppesen, E; Arhonditsis, G; Belolipetsky, PV; Chitamwebwa, DBR; Degermendzhy, AG; DeAngelis, DL; Domis, LND; Downing, AS; Elliott, JA; Fragoso, CR; Gaedke, U; Genova, SN; Gulati, RD; Hakanson, L; Hamilton, DP; Hipsey, MR; 't Hoen, J; Hulsmann, S; Los, FH; Makler-Pick, V; Petzoldt, T; Prokopkin, IG; Rinke, K; Schep, SA; Tominaga, K; Van Dam, AA; Van Nes, EH; Wells, SA; Janse…	Challenges and opportunities for integrating lake ecosystem modelling approaches	Aquatic, Food web dynamics, Plankton, Nutrients, Spatial, Lake, Freshwater, Marine, Community, Population, Hydrology, Eutrophication, Global change, Climate warming, Fisheries, Biodiversity, Management, Mitigation, Adaptive processes, Non-linear dynamics, Analysis, Bifurcation, Understanding, Prediction, Model limitations, Model integration	Royal Netherlands Academy of Arts & Sciences; Netherlands Institute of Ecology (NIOO-KNAW); Aarhus University; Greenland Institute of Natural Resources; University of Toronto; Russian Academy of Sciences; Krasnoyarsk Science Center of the Siberian Branch of the Russian Academy of Sciences; Institute of Computational Modelling of the Siberian Branch of the Russian Academy of Sciences; Siberian Fed…	2010	10.1007/s10452-010-9339-3	Environmental Sciences & Ecology; Marine & Freshwater Biology	2022-06-20	WOS:000285338600012
Comer, PJ; Pressey, RL; Hunter, ML; Schloss, CA; Buttrick, SC; Heller, NE; Tirpak, JM; Faith, DP; Cross, MS; Shaffer, ML	Incorporating geodiversity into conservation decisions	abiotic diversity, adaptive management, conservation planning, conservation policy, ecological diversity, diversidad abiotica, diversidad ecologica, manejo adaptativo, planeacion de la conservacion, politica de conservacion	United States Department of the Interior; US Fish & Wildlife Service; James Cook University; University of Maine System; University of Maine Orono; Duke University; United States Department of the Interior; US Fish & Wildlife Service; Australian Museum; Wildlife Conservation Society	2015	10.1111/cobi.12508	Biodiversity & Conservation; Environmental Sciences & Ecology	2022-06-20	WOS:000354477300010
Robinson, S; Fraser, J; Catlin, D; Karpanty, S; Altman, J; Boettcher, R; Holcomb, K; Huber, C; Hunt, K; Wilke, A	Irruptions: evidence for breeding season habitat limitation in Piping Plover (Charadrius melodus)	Charadrius melodus, density-dependence, eCognition, habitat limitation	Virginia Polytechnic Institute & State University; United States Department of the Interior; United States Department of the Interior; US Fish & Wildlife Service; United States Department of the Interior; US Fish & Wildlife Service; United States Department of Defense; United States Army; U.S. Army Corps of Engineers; Nature Conservancy	2019	10.5751/ACE-01373-140119	Biodiversity & Conservation; Environmental Sciences & Ecology; Zoology	2022-06-20	WOS:000478087900017
Madliger, CL; Franklin, CE; Chown, SL; Fuller, A; Hultine, KR; Costantini, D; Hopkins, WA; Peck, MA; Rummer, JL; Sack, L; Willis, CKR; Cooke, SJ	The second warning to humanity: contributions and solutions from conservation physiology		Carleton University; Carleton University; University of Queensland; Monash University; University of Witwatersrand; Centre National de la Recherche Scientifique (CNRS); Museum National d'Histoire Naturelle (MNHN); UDICE-French Research Universities; Universite de Paris; Virginia Polytechnic Institute & State University; League of European Research Universities - LERU; Utrecht University; Royal Ne…	2021	10.1093/conphys/coab038	Biodiversity & Conservation; Environmental Sciences & Ecology; Physiology	2022-06-20	WOS:000722511800001

## Sheet: Scientific publications Country
UT (Unique WOS ID)	Country	Affiliations
WOS:000075408800009	Israel	Tel Aviv University
WOS:000075408800009	Israel	Tel Aviv University
WOS:000075676100006	US	United States Department Of The Interior
WOS:000075676100006	US	United States Department Of The Interior
WOS:000075676100006	US	United States Geological Survey
WOS:000075676100006	US	United States Geological Survey
WOS:000075676100006	US	University Of Miami
WOS:000075676100006	US	University Of Tennessee Knoxville
WOS:000075676100006	US	University Of Tennessee System
WOS:000082454300013	UK	Newcastle University - Uk
WOS:000085548500004	US	United States Department Of The Interior
WOS:000085548500004	US	United States Geological Survey
WOS:000085548500004	US	University Of Miami
WOS:000085548500004	US	University Of Tennessee Knoxville
WOS:000085548500004	US	University Of Tennessee System
WOS:000088186100006	Israel	Israel Oceanographic and Limnological Research
WOS:000088186100019	Israel	Tel Aviv University
WOS:000088186100019	Israel	Tel Aviv University
WOS:000088549600014	US	Florida marine research institute
WOS:000088616800015	Egypt	Egyptian Knowledge Bank (ekb)
WOS:000088616800015	Egypt	Egyptian Knowledge Bank (ekb)
WOS:000088616800015	Germany	Johannes Gutenberg University Of Mainz
WOS:000088616800015	Egypt	National Institute Of Oceanography & Fisheries (niof)
WOS:000088616800015	Egypt	National Institute Of Oceanography & Fisheries (niof)
WOS:000089484400012	Philippines	University Of The Philippines
WOS:000089484400012	Philippines	University Of The Philippines
WOS:000168327400006	US	University Of Miami
WOS:000172560800007	US	National Oceanic Atmospheric Admin (noaa) - Usa
WOS:000172560800007	US	National Oceanic Atmospheric Admin (noaa) - Usa
WOS:000172609000004	Australia	Australian Institute Of Marine Science
WOS:000172609000013	International	Nature Conservancy
WOS:000172609000013	US	University Of Miami
WOS:000172609000013	US	University Of North Carolina
WOS:000172609000013	US	University Of North Carolina
WOS:000172609000015	US	Texas A&m University System
WOS:000172609000015	US	Texas A&m University System
WOS:000172609000015	US	United States Department Of The Interior
WOS:000172609000015	US	United States Geological Survey
WOS:000172609000016	Kenya	NA
WOS:000172609000017	US	Los Alamos National Laboratory
WOS:000172609000017	Canada	Mcmaster University
WOS:000172609000017	Canada	Saint Francis Xavier University - Canada
WOS:000172609000017	US	United States Department Of Energy (doe)
WOS:000172609000017	US	University Of California Berkeley
WOS:000172609000017	US	University Of California System
WOS:000172609000018	US	United States Department Of The Interior
WOS:000172609000018	US	United States Department Of The Interior
WOS:000172609000018	US	United States Geological Survey
WOS:000172609000019	South Africa	University Of Kwazulu Natal
WOS:000172609000020	Brazil	Universidade Federal Do Rio De Janeiro
WOS:000172609000022	US	National Oceanic Atmospheric Admin (noaa) - Usa
WOS:000172609000023	US	University Of Guam
WOS:000172609000034	US	Texas A&m University College Station
WOS:000172609000034	US	Texas A&m University System
WOS:000172609000039	US	State University System Of Florida
WOS:000172609000039	US	University Of South Florida
WOS:000172609000045	US	Florida State University
WOS:000172609000045	US	State University System Of Florida
WOS:000172609000048	Austria	University Of Graz
WOS:000172609000050	US	Cnidarian Research Institute
WOS:000172609000051	Fiji	NA
WOS:000172609000053	US	Claremont Colleges
WOS:000172609000053	US	Claremont Graduate School
WOS:000172609000055	US	Nova Southeastern University
WOS:000172609000055	US	State University System Of Florida
WOS:000172609000055	US	University Of Central Florida
WOS:000172609000056	International	League Of European Research Universities - Leru
WOS:000172609000056	Germany	University Of Munich
WOS:000172926500012	International	League Of European Research Universities - Leru
WOS:000172926500012	International	League Of European Research Universities - Leru
WOS:000172926500012	Netherlands	Royal Netherlands Institute For Sea Research (nioz)
WOS:000172926500012	Netherlands	University Of Amsterdam
WOS:000172926500012	Netherlands	Utrecht University
WOS:000176268400015	US	Duke University
WOS:000176268400015	Israel	Tel Aviv University
WOS:000177885900072	Italy	Consiglio Nazionale Delle Ricerche (cnr)
WOS:000177885900072	Italy	Polytechnic University Of Turin
WOS:000177885900072	Italy	University Of Catania
WOS:000178921800010	Israel	Tel Aviv University
WOS:000178921800010	Israel	Tel Aviv University
WOS:000181056700008	Taiwan	National Sun Yat Sen University
WOS:000184541200001	US	NA
WOS:000185453500002	US	George Washington University
WOS:000185453500002	US	University Of Michigan
WOS:000185453500002	US	University Of Michigan
WOS:000185682400002	Israel	Israel Oceanographic and Limnological Research
WOS:000185688300003	Sweden	Kristineberg Marine Research Center
WOS:000186531800006	US	National Oceanic Atmospheric Admin (noaa) - Usa
WOS:000186531800006	US	University Of Miami
WOS:000224071800007	International	Nature Conservancy
WOS:000224071800007	US	University Of California Santa Cruz
WOS:000224071800007	US	University Of California Santa Cruz
WOS:000224071800007	US	University Of California System
WOS:000224071800007	US	University Of California System
WOS:000224135000009	International	League Of European Research Universities - Leru
WOS:000224135000009	International	League Of European Research Universities - Leru
WOS:000224135000009	Netherlands	Royal Netherlands Institute For Sea Research (nioz)
WOS:000224135000009	Netherlands	University Of Amsterdam
WOS:000224135000009	Netherlands	Utrecht University
WOS:000226438600016	Indonesia	The Nature Conservancy Indonesia
WOS:000226438600016	US	University Of California Berkeley
WOS:000226438600016	US	University Of California System
WOS:000227787300009	US	National Oceanic Atmospheric Admin (noaa) - Usa
WOS:000227787300009	US	National Oceanic Atmospheric Admin (noaa) - Usa
WOS:000227787300009	US	National Oceanic Atmospheric Admin (noaa) - Usa
WOS:000227787300010	US	National Oceanic Atmospheric Admin (noaa) - Usa
WOS:000228594400004	International	League Of European Research Universities - Leru
WOS:000228594400004	UK	University Of Oxford
WOS:000232951200010	Australia	Commonwealth Scientific & Industrial Research Organisation (csiro)
WOS:000232951200010	Australia	University Of Queensland
WOS:000232951200010	Australia	University Of Queensland
WOS:000234690100007	Israel	Hebrew University Of Jerusalem
WOS:000234690100007	France	Inst Natl Agron Paris Grignon
WOS:000234690100007	International	League Of European Research Universities - Leru
WOS:000234690100007	France	Udice-french Research Universities
WOS:000234690100007	France	Universite Paris Saclay
WOS:000235074300013	Israel	Tel Aviv University
WOS:000238327200024	Israel	Hebrew University Of Jerusalem
WOS:000238899200013	Taiwan	Nanhua University
WOS:000240559500047	Israel	Hebrew University Of Jerusalem
WOS:000241395900004	Thailand	Ramkhamhaeng University
WOS:000242473000003	Israel	Tel Aviv University
WOS:000242686600012	US	University Of Miami
WOS:000244074100012	China	Chinese Academy Of Sciences
WOS:000244074100012	China	Chinese Academy Of Sciences
WOS:000244074100012	China	Chinese Academy Of Sciences
WOS:000244074100012	China	South China Sea Institute Of Oceanology, Cas
WOS:000244503800012	US	National Oceanic Atmospheric Admin (noaa) - Usa
WOS:000251203500014	Italy	Universita Degli Studi Di Bari Aldo Moro
WOS:000251203500014	US	University Of Miami
WOS:000252701100014	US	National Geodetic Survey, Noaa
WOS:000252701100014	US	National Oceanic Atmospheric Admin (noaa) - Usa
WOS:000252701100014	US	National Oceanic Atmospheric Admin (noaa) - Usa
WOS:000252701100014	US	University Of Miami
WOS:000252701100014	US	University Of Miami
WOS:000254599900010	Spain	Consejo Superior De Investigaciones Cientificas (csic)
WOS:000254599900010	Spain	Consejo Superior De Investigaciones Cientificas (csic)
WOS:000254599900010	Spain	Csic - Centre D'estudis Avancats De Blanes (ceab)
WOS:000254599900010	Spain	Csic - Centro Mediterraneo De Investigaciones Marinas Y Ambientales (cmima)
WOS:000254599900010	Spain	Csic - Instituto De Ciencias Del Mar (icm)
WOS:000254599900010	International	League Of European Research Universities - Leru
WOS:000254599900010	Spain	University Of Barcelona
WOS:000258430500014	US	Boston University
WOS:000258430500014	US	Forsyth Institute
WOS:000258430500014	US	Forsyth Institute
WOS:000258430500014	US	Harvard School Of Dental Medicine
WOS:000258430500014	US	Harvard University
WOS:000258430500014	US	Harvard University
WOS:000263227300005	Philippines	University Of The Philippines
WOS:000263227300005	Philippines	University Of The Philippines
WOS:000263911000004	US	University Of North Carolina
WOS:000263911000004	US	University Of North Carolina
WOS:000264533600005	US	National Oceanic Atmospheric Admin (noaa) - Usa
WOS:000264533600005	US	National Oceanic Atmospheric Admin (noaa) - Usa
WOS:000265977400010	US	University Of Rhode Island
WOS:000266642200003	International	Global Coral Reef Alliance
WOS:000268105100003	Philippines	University Of The Philippines
WOS:000268105100003	Philippines	University Of The Philippines
WOS:000268323800020	US	Georgia Institute Of Technology
WOS:000268323800020	Venezuela	Simon Bolivar University
WOS:000268323800020	Colombia	University Of The Andes Colombia
WOS:000268323800020	US	University System Of Georgia
WOS:000274294200024	Germany	Leibniz Zentrum Fur Marine Tropenforschung (zmt)
WOS:000275416700002	US	National Geodetic Survey, Noaa
WOS:000275416700002	US	National Oceanic Atmospheric Admin (noaa) - Usa
WOS:000275416700002	Spain	Universitat De Girona
WOS:000275416700002	US	University Of Miami
WOS:000276290400026	Israel	University Of Haifa
WOS:000277872800012	Tanzania	Sokoine University Of Agriculture
WOS:000277872800012	Israel	University Of Haifa
WOS:000277872800012	Israel	University Of Haifa
WOS:000277947000004	India	Alagappa University
WOS:000277947000004	India	Annamalai University
WOS:000277947000004	India	Council Of Scientific & Industrial Research (csir) - India
WOS:000277947000004	Spain	Csir - National Institute Of Oceanography (nio)
WOS:000279068500004	Brazil	Universidade Estadual Paulista
WOS:000279068500004	US	University Of Connecticut
WOS:000279670600001	Germany	Leibniz Zentrum Fur Marine Tropenforschung (zmt)
WOS:000280225200023	US	University Of Miami
WOS:000280976600002	Australia	Commonwealth Scientific & Industrial Research Organisation (csiro)
WOS:000280976600002	Australia	Commonwealth Scientific & Industrial Research Organisation (csiro)
WOS:000280976600002	Australia	Commonwealth Scientific & Industrial Research Organisation (csiro)
WOS:000281286800018	Australia	South Australia Research and Development Institute
WOS:000281717200011	US	University Of Miami
WOS:000283677400010	Australia	Commonwealth Scientific & Industrial Research Organisation (csiro)
WOS:000283677400010	Australia	James Cook University
WOS:000283677400010	Australia	James Cook University
WOS:000283677400010	Philippines	Silliman University
WOS:000283677400010	US	United States Department Of The Interior
WOS:000283677400010	US	United States Geological Survey
WOS:000283677400010	US	University Of California Santa Barbara
WOS:000283677400010	US	University Of California System
WOS:000283677400010	Australia	University Of Tasmania
WOS:000283677400010	International	Wildlife Conservation Society
WOS:000283718000004	International	Cgiar
WOS:000283718000004	UK	Newcastle University - Uk
WOS:000283718000004	Philippines	University Of The Philippines
WOS:000283718000004	Philippines	University Of The Philippines
WOS:000283718000004	International	Worldfish
WOS:000286828700006	Mexico	Cicese - Centro De Investigacion Cientifica Y De Educacion Superior De Ensenada
WOS:000286828700006	Mexico	Universidad De Colima
WOS:000287932600011	Singapore	National University Of Singapore
WOS:000287932600011	UK	Newcastle University - Uk
WOS:000287932600011	Philippines	University Of The Philippines
WOS:000287932600011	Philippines	University Of The Philippines
WOS:000288046200006	International	League Of European Research Universities - Leru
WOS:000288046200006	Netherlands	University Of Amsterdam
WOS:000288984400003	US	Mote Marine Laboratory & Aquarium
WOS:000288984400003	US	State University System Of Florida
WOS:000288984400003	US	State University System Of Florida
WOS:000288984400003	US	University Of Florida
WOS:000288984400003	US	University Of South Florida
WOS:000289388500009	Israel	University Of Haifa
WOS:000289893200002	US	Stanford University
WOS:000289893200002	US	University Of Rhode Island
WOS:000289893200002	US	University Of Rhode Island
WOS:000289893200002	US	University Of Rhode Island
WOS:000291371100013	Japan	Japan Science & Technology Agency (jst)
WOS:000291371100013	Japan	Kyushu University
WOS:000291371100013	Japan	Nagasaki University
WOS:000291371100013	Japan	University Of Ryukyus
WOS:000291902300002	US	Florida International University
WOS:000291902300002	US	State University System Of Florida
WOS:000293536600009	US	University Hawaii Hilo
WOS:000293536600009	US	University Of Guam
WOS:000293536600009	US	University Of Hawaii
WOS:000293536600009	Australia	University Of Queensland
WOS:000293636400016	Australia	James Cook University
WOS:000293636400016	Australia	James Cook University
WOS:000294480100011	Spain	Autonomous University Of Barcelona
WOS:000294480100011	Spain	Consejo Superior De Investigaciones Cientificas (csic)
WOS:000294480100011	Italy	Consiglio Nazionale Delle Ricerche (cnr)
WOS:000294480100011	Italy	Consiglio Nazionale Delle Ricerche (cnr)
WOS:000294480100011	Spain	Csic - Centro Mediterraneo De Investigaciones Marinas Y Ambientales (cmima)
WOS:000294480100011	Spain	Csic - Instituto De Ciencias Del Mar (icm)
WOS:000294480100011	Italy	Istituto Di Scienze Marine (ismar-cnr)
WOS:000294480100011	Italy	University Of Pisa
WOS:000294619800011	Japan	University Of Tokyo
WOS:000298520400041	Japan	Fisheries Research Agency - Japan
WOS:000299580200014	US	University Of Hawaii
WOS:000299580200014	US	University Of Hawaii
WOS:000299580200014	US	University Of Hawaii
WOS:000299580200014	US	University Of Hawaii
WOS:000301617000003	US	University Of California Santa Barbara
WOS:000301617000003	US	University Of California Santa Barbara
WOS:000301617000003	US	University Of California System
WOS:000301617000003	US	University Of California System
WOS:000302065400028	US	University Of Hawaii
WOS:000302065400028	US	University Of Hawaii
WOS:000302291700010	US	University Of California Davis
WOS:000302291700010	US	University Of California System
WOS:000302291700010	US	University Of Michigan
WOS:000302291700010	US	University Of Michigan
WOS:000302291700010	US	University Of Michigan
WOS:000302291700010	US	University Of Michigan
WOS:000302291700010	Australia	University Of Queensland
WOS:000302291700010	Australia	University Of Queensland
WOS:000302314800025	Italy	Marche Polytechnic University
WOS:000302314800025	Singapore	National University Of Singapore
WOS:000303017700047	Australia	Macquarie University
WOS:000303017700047	US	University Of California Santa Barbara
WOS:000303017700047	US	University Of California Santa Barbara
WOS:000303017700047	US	University Of California Santa Barbara
WOS:000303017700047	US	University Of California System
WOS:000303017700047	US	University Of California System
WOS:000303017700047	US	University Of California System
WOS:000303605800009	Canada	University Of British Columbia
WOS:000303679400040	India	Council Of Scientific & Industrial Research (csir) - India
WOS:000303679400040	India	Council Of Scientific & Industrial Research (csir) - India
WOS:000303679400040	Spain	Csir - National Geophysical Research Institute (ngri)
WOS:000303679400040	Spain	Csir - National Geophysical Research Institute (ngri)
WOS:000306123200006	Japan	Fisheries Research Agency - Japan
WOS:000307723300019	US	National Oceanic Atmospheric Admin (noaa) - Usa
WOS:000307723300019	US	State University System Of Florida
WOS:000307723300019	Puerto Rica	University Of Puerto Rico
WOS:000307723300019	Puerto Rica	University Of Puerto Rico
WOS:000307723300019	US	University Of South Florida
WOS:000308101200008	Philippines	University Of The Philippines
WOS:000308101200008	Philippines	University Of The Philippines
WOS:000310104100008	US	Lawrence Livermore National Laboratory
WOS:000310104100008	US	United States Department Of Energy (doe)
WOS:000310104100008	US	University Of California Santa Cruz
WOS:000310104100008	US	University Of California System
WOS:000310104100008	Australia	University Of Queensland
WOS:000313047600009	UK	Newcastle University - Uk
WOS:000313047600009	UK	University Of Essex
WOS:000313047600009	New Zealand	Victoria University Wellington
WOS:000316200200001	France	Aix-marseille Universite
WOS:000316200200001	Australia	Australian Institute Of Marine Science
WOS:000316200200001	France	Institut De Recherche Pour Le Developpement (ird)
WOS:000316200200001	US	Pennsylvania Commonwealth System Of Higher Education (pcshe)
WOS:000316200200001	US	Pennsylvania State University
WOS:000316200200001	US	Pennsylvania State University
WOS:000316200200001	France	Udice-french Research Universities
WOS:000317878400032	Greece	Technical University Of Crete
WOS:000319961900021	US	Florida State University
WOS:000319961900021	US	State University System Of Florida
WOS:000320684700003	New Zealand	University Of Auckland
WOS:000320684700003	Fiji	University Of The South Pacific
WOS:000321414100005	Tanzania	Sokoine University Of Agriculture
WOS:000321414100005	Israel	University Of Haifa
WOS:000321414100005	Israel	University Of Haifa
WOS:000321937700021	Taiwan	Academia Sinica
WOS:000321937700021	Taiwan	Academia Sinica
WOS:000321937700021	Australia	James Cook University
WOS:000321937700021	Taiwan	National Taiwan University
WOS:000321937700021	Taiwan	Taiwan Fish Research Institute
WOS:000322008300009	Japan	Research Institute For Humanity & Nature (rihn)
WOS:000322008300009	Japan	Tokyo University Of Marine Science & Technology
WOS:000322008300009	Indonesia	Universitas Sam Ratulangi
WOS:000322431600006	US	Florida Fish & Wildlife Conservation Commission
WOS:000322431600006	US	United States Department Of The Interior
WOS:000322431600006	US	United States Geological Survey
WOS:000326166400004	Canada	Laval University
WOS:000326166400004	US	Moss Landing Marine Laboratories
WOS:000326166400004	US	National Oceanic Atmospheric Admin (noaa) - Usa
WOS:000326166400004	US	National Oceanic Atmospheric Admin (noaa) - Usa
WOS:000326166400004	US	University Of Southern Mississippi
WOS:000328871300007	Australia	Commonwealth Scientific & Industrial Research Organisation (csiro)
WOS:000329006300001	Spain	University Of Murcia
WOS:000329006300001	Puerto Rica	University Of Puerto Rico
WOS:000329384600017	Australia	Commonwealth Scientific & Industrial Research Organisation (csiro)
WOS:000329384600017	Australia	Commonwealth Scientific & Industrial Research Organisation (csiro)
WOS:000329384600017	Australia	Commonwealth Scientific & Industrial Research Organisation (csiro)
WOS:000329384600017	International	Conservation International
WOS:000329384600017	Australia	James Cook University
WOS:000329776200002	Germany	Leibniz Zentrum Fur Marine Tropenforschung (zmt)
WOS:000330125700011	Germany	Leibniz Zentrum Fur Marine Tropenforschung (zmt)
WOS:000330125700011	France	Universite Perpignan Via Domitia
WOS:000330125700011	France	Universite Perpignan Via Domitia
WOS:000330802700009	US	Stanford University
WOS:000330802700009	US	University Of Rhode Island
WOS:000330802700009	US	University Of Rhode Island
WOS:000330965000006	Australia	Australian Institute Of Marine Science
WOS:000330965000006	Singapore	Nanyang Technological University
WOS:000330965000006	Singapore	Nanyang Technological University
WOS:000330965000006	UK	Newcastle University - Uk
WOS:000330965000006	Australia	University Of New South Wales Sydney
WOS:000330965000006	Philippines	University Of The Philippines
WOS:000330965000006	Philippines	University Of The Philippines
WOS:000330965000006	Australia	University Of Western Australia
WOS:000332490900002	Canada	University Of Manitoba
WOS:000334087300011	US	Florida Fish & Wildlife Conservation Commission
WOS:000334087300011	US	United States Department Of The Interior
WOS:000334087300011	US	University Of Miami
WOS:000334975900008	US	Florida Fish & Wildlife Conservation Commission
WOS:000334975900008	US	Pennsylvania Commonwealth System Of Higher Education (pcshe)
WOS:000334975900008	US	Pennsylvania State University
WOS:000334975900008	US	Pennsylvania State University
WOS:000334975900008	US	University Of Miami
WOS:000335877100006	International	League Of European Research Universities - Leru
WOS:000335877100006	International	League Of European Research Universities - Leru
WOS:000335877100006	International	League Of European Research Universities - Leru
WOS:000335877100006	International	Nature Conservancy
WOS:000335877100006	International	Nature Conservancy
WOS:000335877100006	US	University Of California Santa Cruz
WOS:000335877100006	US	University Of California System
WOS:000335877100006	UK	University Of Cambridge
WOS:000335877100006	UK	University Of Cambridge
WOS:000335877100006	UK	University Of Cambridge
WOS:000336842500007	US	National Oceanic Atmospheric Admin (noaa) - Usa
WOS:000339534800002	Spain	Universidad De Guadalajara
WOS:000342924200017	International	Nature Conservancy
WOS:000342924200017	US	University Of Hawaii
WOS:000342924200017	US	University Of Hawaii
WOS:000343315900030	Philippines	University Of The Philippines
WOS:000343315900030	Philippines	University Of The Philippines
WOS:000343671700034	US	Pennsylvania Commonwealth System Of Higher Education (pcshe)
WOS:000343671700034	US	Pennsylvania State University
WOS:000343671700034	US	University Of Miami
WOS:000343697600013	US	Coastal Carolina University
WOS:000343697600013	US	College Of Charleston
WOS:000343697600013	US	National Institute Of Standards & Technology (nist) - Usa
WOS:000343697600013	US	Skidaway Institute Of Oceanography
WOS:000343697600013	US	University Of Georgia
WOS:000343697600013	US	University Of Miami
WOS:000343697600013	US	University System Of Georgia
WOS:000343799900006	Australia	University Of Queensland
WOS:000343799900006	US	University Of Texas Austin
WOS:000343799900006	US	University Of Texas Austin
WOS:000343799900006	US	University Of Texas System
WOS:000343799900006	Virgin Islands	University Of The Virgin Islands
WOS:000347619100003	US	George Mason University
WOS:000347619100003	US	National Oceanic Atmospheric Admin (noaa) - Usa
WOS:000347619100003	US	University Of Miami
WOS:000348652400002	UK	University Of Exeter
WOS:000348652400002	Australia	University Of Queensland
WOS:000348652400002	Australia	University Of Queensland
WOS:000348652400002	Australia	University Of Queensland
WOS:000350949700001	International	League Of European Research Universities - Leru
WOS:000350949700001	Netherlands	University Of Amsterdam
WOS:000350949700001	US	University Of California Merced
WOS:000350949700001	US	University Of California System
WOS:000353092800003	Puerto Rica	University Of Puerto Rico
WOS:000353092800003	Puerto Rica	University Of Puerto Rico
WOS:000353092800003	Puerto Rica	University Of Puerto Rico
WOS:000353092800003	Puerto Rica	University Of Puerto Rico Medical Sciences Campus
WOS:000354393700009	Australia	Australian Institute Of Marine Science
WOS:000354393700009	UK	Newcastle University - Uk
WOS:000354393700009	Philippines	University Of The Philippines
WOS:000354393700009	Philippines	University Of The Philippines
WOS:000354393700009	Australia	University Of Western Australia
WOS:000354477300010	Australia	Australian Museum
WOS:000354477300010	US	Duke University
WOS:000354477300010	Australia	James Cook University
WOS:000354477300010	US	United States Department Of The Interior
WOS:000354477300010	US	United States Department Of The Interior
WOS:000354477300010	US	University Of Maine
WOS:000354477300010	US	University Of Maine
WOS:000354477300010	US	Us Fish & Wildlife Service
WOS:000354477300010	US	Us Fish & Wildlife Service
WOS:000354477300010	International	Wildlife Conservation Society
WOS:000355679500001	US	Skidaway Institute Of Oceanography
WOS:000355679500001	Portugal	Universidade De Aveiro
WOS:000355679500001	Portugal	Universidade De Aveiro
WOS:000355679500001	Portugal	Universidade De Lisboa
WOS:000355679500001	Portugal	Universidade De Lisboa
WOS:000355679500001	Romania	University Of Bacau
WOS:000355679500001	US	University Of Georgia
WOS:000355679500001	US	University System Of Georgia
WOS:000355885800009	Iran	Shahid Beheshti University Medical Sciences
WOS:000355885800009	Iran	University Of Tehran
WOS:000355885800009	Iran	University Of Tehran
WOS:000356537700002	India	Brawijaya University
WOS:000357040100001	India	Council Of Scientific & Industrial Research (csir) - India
WOS:000357040100001	Spain	Csir - National Institute Of Oceanography (nio)
WOS:000358127300005	Australia	University Of Queensland
WOS:000358127300005	Philippines	University Of The Philippines
WOS:000358127300005	Philippines	University Of The Philippines
WOS:000360673200011	US	State University System Of Florida
WOS:000360673200011	US	United States Department Of The Interior
WOS:000360673200011	US	United States Department Of The Interior
WOS:000360673200011	US	United States Department Of The Interior
WOS:000360673200011	US	United States Geological Survey
WOS:000360673200011	US	United States Geological Survey
WOS:000360673200011	US	United States Geological Survey
WOS:000360673200011	US	University Of Miami
WOS:000360673200011	US	University Of West Florida
WOS:000363255100003	US	University Of Miami
WOS:000363671300017	US	United States Department Of Agriculture (usda)
WOS:000363671300017	US	United States Forest Service
WOS:000363948000051	Australia	Southern Cross University
WOS:000363948000051	Philippines	University Of The Philippines
WOS:000363948000051	Philippines	University Of The Philippines
WOS:000364252300006	US	Colby College
WOS:000364252300006	US	Columbia University
WOS:000364252300006	International	Conservation International
WOS:000364252300006	US	National Oceanic Atmospheric Admin (noaa) - Usa
WOS:000364252300006	US	Stanford University
WOS:000364252300006	US	Stanford University
WOS:000364252300006	Australia	University Of Queensland
WOS:000364252300006	UK	University Of York - Uk
WOS:000364328000009	US	Smithsonian Institution
WOS:000364328000009	US	Smithsonian National Museum Of Natural History
WOS:000369530000004	Australia	James Cook University
WOS:000369530000004	Australia	James Cook University
WOS:000369530000004	Saudi Arabia	King Abdullah University Of Science & Technology
WOS:000369530000004	Chile	Universidad Austral De Chile
WOS:000370992100006	Indonesia	Bogor Agricultural University
WOS:000370992100006	International	Cgiar
WOS:000370992100006	International	Cgiar
WOS:000370992100006	International	Cgiar
WOS:000370992100006	Indonesia	Indonesian Institute Of Sciences
WOS:000370992100006	Australia	James Cook University
WOS:000370992100006	Indonesia	Ministry Of Marine Affairs And Fisheries
WOS:000370992100006	Indonesia	Ministry Of Marine Affairs And Fisheries
WOS:000370992100006	Sweden	Stockholm University
WOS:000370992100006	Tanzania	University Of Dar Es Salaam
WOS:000370992100006	UK	University Of Exeter
WOS:000370992100006	Australia	University Of Wollongong
WOS:000370992100006	International	Worldfish
WOS:000370992100006	International	Worldfish
WOS:000370992100006	International	Worldfish
WOS:000371163700023	US	Nova Southeastern University
WOS:000371661900006	Israel	Tel Aviv University
WOS:000371661900006	Israel	Tel Aviv University
WOS:000372171700079	Egypt	Egyptian Knowledge Bank (ekb)
WOS:000372171700079	Egypt	Suez Canal University
WOS:000375186000009	US	State University System Of Florida
WOS:000375186000009	US	University Of Florida
WOS:000378092900008	Australia	University Of Queensland
WOS:000378092900008	Australia	University Of Queensland
WOS:000378092900008	Australia	University Of Queensland
WOS:000378092900008	Australia	University Of Queensland
WOS:000378298400064	China	Beijing Institute Of Technology
WOS:000378298400064	China	Changchun Institute Of Optics, Fine Mechanics & Physics, Cas
WOS:000378298400064	China	Chinese Academy Of Sciences
WOS:000378298400064	China	Hangzhou Dianzi University
WOS:000378298400064	China	State Oceanic Administration
WOS:000378298400064	China	Zhejiang University
WOS:000379370700013	Puerto Rica	University Of Puerto Rico
WOS:000379370700013	Puerto Rica	University Of Puerto Rico
WOS:000379370700013	Puerto Rica	University Of Puerto Rico
WOS:000379370700013	Puerto Rica	University Of Puerto Rico
WOS:000381060900023	China	Beijing Normal University
WOS:000381060900023	US	Duke University
WOS:000383719700004	US	National Oceanic Atmospheric Admin (noaa) - Usa
WOS:000383719700004	US	United States Department Of The Interior
WOS:000383719700004	US	University Of Miami
WOS:000383779500012	Australia	James Cook University
WOS:000383779500012	US	National Oceanic Atmospheric Admin (noaa) - Usa
WOS:000383779500012	US	State University System Of Florida
WOS:000383779500012	US	University Of Hawaii
WOS:000383779500012	US	University Of West Florida
WOS:000385574500002	US	National Oceanic Atmospheric Admin (noaa) - Usa
WOS:000385574500002	US	National Oceanic Atmospheric Admin (noaa) - Usa
WOS:000385574500002	US	United States Department Of The Interior
WOS:000385574500002	US	University Of California Merced
WOS:000385574500002	US	University Of California System
WOS:000385574500002	US	University Of Hawaii
WOS:000385574500002	US	University Of Hawaii
WOS:000385574500002	US	University Of Hawaii
WOS:000385574500002	US	University Of Hawaii
WOS:000385574500002	US	University Of Hawaii
WOS:000385574500002	US	University Of Hawaii
WOS:000385574500002	US	University Of Hawaii
WOS:000385574500002	US	University Of Hawaii
WOS:000385574500002	US	University Of Hawaii
WOS:000385574500002	US	University Of Hawaii
WOS:000385574500002	US	Us Fish & Wildlife Service
WOS:000385574500002	US	Washington State University
WOS:000385632600008	US	State University System Of Florida
WOS:000385632600008	US	State University System Of Florida
WOS:000385632600008	US	University Of Florida
WOS:000385632600008	US	University Of Florida
WOS:000386204500081	Australia	Griffith University
WOS:000386204500081	Australia	Griffith University
WOS:000386204500081	Australia	University Of Queensland
WOS:000386204500081	Australia	University Of Queensland
WOS:000386204500081	Australia	University Of The Sunshine Coast
WOS:000388425600006	US	National Oceanic Atmospheric Admin (noaa) - Usa
WOS:000388425600006	US	National Oceanic Atmospheric Admin (noaa) - Usa
WOS:000388425600006	US	National Oceanic Atmospheric Admin (noaa) - Usa
WOS:000388425600006	US	National Oceanic Atmospheric Admin (noaa) - Usa
WOS:000388425600006	US	University Of Miami
WOS:000389654600001	South Africa	Nelson Mandela University
WOS:000389654600001	US	Smithsonian Institution
WOS:000389654600001	US	Smithsonian National Museum Of Natural History
WOS:000390143700004	US	National Oceanic Atmospheric Admin (noaa) - Usa
WOS:000390454300025	Italy	Consiglio Nazionale Delle Ricerche (cnr)
WOS:000390454300025	Italy	L'istituto Per L'ambiente Marino Costiero (iamc-cnr)
WOS:000390454300025	Italy	Stazione Zoologica Anton Dohrn Di Napoli
WOS:000390454300025	Italy	University Of Bologna
WOS:000390495800016	US	?nuenue Fisheries Research Center
WOS:000390965400016	US	University Of Guam
WOS:000390965400016	US	University Of Hawaii
WOS:000390965400016	US	University Of Hawaii
WOS:000392999900006	US	Mote Marine Laboratory & Aquarium
WOS:000392999900006	US	State University System Of Florida
WOS:000392999900006	US	University Of Florida
WOS:000396071600009	China	Ministry Of Education, China
WOS:000396071600009	China	State Oceanic Administration
WOS:000397182900001	France	Centre National De La Recherche Scientifique (cnrs)
WOS:000397182900001	France	Centre National De La Recherche Scientifique (cnrs)
WOS:000397182900001	France	Cirad
WOS:000397182900001	France	Cnrs - Institute Of Ecology & Environment (inee)
WOS:000397182900001	France	Cnrs - Institute Of Ecology & Environment (inee)
WOS:000397182900001	France	Ecole Pratique Des Hautes Etudes (ephe)
WOS:000397182900001	France	Institut Agro
WOS:000397182900001	France	Institut De Recherche Pour Le Developpement (ird)
WOS:000397182900001	France	Montpellier Supagro
WOS:000397182900001	France	Psl Research University Paris
WOS:000397182900001	France	Universite De Montpellier
WOS:000397182900001	France	Universite Paul-valery
WOS:000397182900001	France	University Of La Reunion
WOS:000399562800009	US	National Oceanic Atmospheric Admin (noaa) - Usa
WOS:000399562800009	US	National Oceanic Atmospheric Admin (noaa) - Usa
WOS:000399623700050	Denmark	Aarhus University
WOS:000399623700050	Denmark	Technical University Of Denmark
WOS:000401846200007	US	University Of Hawaii
WOS:000404044600001	International	League Of European Research Universities - Leru
WOS:000404044600001	International	League Of European Research Universities - Leru
WOS:000404044600001	Germany	University Of Freiburg
WOS:000404044600001	Germany	University Of Freiburg
WOS:000404044600001	Germany	University Of Freiburg
WOS:000404123900010	Australia	Southern Cross University
WOS:000404123900010	Australia	Southern Cross University
WOS:000404305300017	Israel	University Of Haifa
WOS:000404305300030	France	Centre National De La Recherche Scientifique (cnrs)
WOS:000404305300030	France	Centre National De La Recherche Scientifique (cnrs)
WOS:000404305300030	France	Cirad
WOS:000404305300030	France	Cnrs - Institute For Humanities & Social Sciences (inshs)
WOS:000404305300030	France	Ecole Pratique Des Hautes Etudes (ephe)
WOS:000404305300030	France	Institut Agro
WOS:000404305300030	France	Institut Agro
WOS:000404305300030	France	Institut De Recherche Pour Le Developpement (ird)
WOS:000404305300030	International	League Of European Research Universities - Leru
WOS:000404305300030	France	Montpellier Supagro
WOS:000404305300030	France	Montpellier Supagro
WOS:000404305300030	US	Nova Southeastern University
WOS:000404305300030	France	Psl Research University Paris
WOS:000404305300030	France	Sorbonne Universite
WOS:000404305300030	France	Udice-french Research Universities
WOS:000404305300030	France	Udice-french Research Universities
WOS:000404305300030	France	Universite De Montpellier
WOS:000404305300030	France	Universite De Montpellier
WOS:000404305300030	France	Universite Paul-valery
WOS:000405240100006	Brazil	Universidade Do Estado Do Rio De Janeiro
WOS:000405240100006	Brazil	Universidade Do Estado Do Rio De Janeiro
WOS:000405240100006	Brazil	Universidade Federal Do Rio De Janeiro
WOS:000406954100001	US	Atlantic Oceanographic & Meteorological Laboratory (aoml)
WOS:000406954100001	US	Mote Marine Laboratory & Aquarium
WOS:000406954100001	US	National Oceanic Atmospheric Admin (noaa) - Usa
WOS:000406954100001	US	United States Department Of The Interior
WOS:000406954100001	US	United States Geological Survey
WOS:000406954100001	US	University Of Miami
WOS:000408107000139	UK	Natural Environment Research Council (nerc)
WOS:000408107000139	UK	Nerc British Geological Survey
WOS:000408107000139	UK	Nerc National Oceanography Centre
WOS:000408107000139	UK	Uk Research & Innovation (ukri)
WOS:000408107000139	Ireland	University College Dublin
WOS:000408107000139	Ireland	University College Dublin
WOS:000408107000139	UK	University Of Southampton
WOS:000408107000139	UK	University Of Southampton
WOS:000410011900009	International	League Of European Research Universities - Leru
WOS:000410011900009	Netherlands	Radboud University Nijmegen
WOS:000410011900009	Netherlands	Royal Netherlands Institute For Sea Research (nioz)
WOS:000410011900009	Netherlands	University Of Groningen
WOS:000410011900009	Netherlands	Utrecht University
WOS:000410138500009	Mexico	Universidad De Colima
WOS:000410243200022	US	Florida International University
WOS:000410243200022	US	Florida International University
WOS:000410243200022	US	State University System Of Florida
WOS:000410243200022	US	State University System Of Florida
WOS:000411958700002	Australia	Australian Institute Of Marine Science
WOS:000411958700002	US	Boston University
WOS:000411958700002	US	Pennsylvania Commonwealth System Of Higher Education (pcshe)
WOS:000411958700002	US	Pennsylvania State University
WOS:000411958700002	US	Pennsylvania State University
WOS:000411958700002	US	University Of North Carolina
WOS:000411958700002	US	University Of North Carolina Chapel Hill
WOS:000411958700002	US	University Of North Carolina School Of Medicine
WOS:000411958700002	US	University Of Texas Austin
WOS:000411958700002	US	University Of Texas System
WOS:000411958700002	United Arab Emirates	Zayed University
WOS:000413483000006	Mexico	Universidad Michoacana De San Nicolas De Hidalgo
WOS:000413551100009	Singapore	National University Of Singapore
WOS:000414231000033	Australia	Australian Institute Of Marine Science
WOS:000414231000033	US	Smithsonian Institution
WOS:000414231000033	US	Smithsonian National Zoological Park & Conservation Biology Institute
WOS:000414231000033	US	University Of Hawaii
WOS:000414231000033	Australia	University Of Melbourne
WOS:000414772000006	Singapore	National University Of Singapore
WOS:000414772400001	US	State University System Of Florida
WOS:000414772400001	US	Texas A&m University System
WOS:000414772400001	US	University Of Florida
WOS:000415271600010	US	University Of Miami
WOS:000415691300004	US	Florida Fish & Wildlife Conservation Commission
WOS:000415691300004	US	Mote Marine Laboratory & Aquarium
WOS:000415691300004	US	National Oceanic Atmospheric Admin (noaa) - Usa
WOS:000415691300004	US	Nova Southeastern University
WOS:000415691300004	US	University Of Miami
WOS:000416047200006	US	Pennsylvania Commonwealth System Of Higher Education (pcshe)
WOS:000416047200006	US	Pennsylvania State University
WOS:000416047200006	US	Pennsylvania State University
WOS:000416192200002	Spain	Universidad De Guadalajara
WOS:000416741800039	Australia	Southern Cross University
WOS:000418644100035	International	League Of European Research Universities - Leru
WOS:000418644100035	UK	Newcastle University - Uk
WOS:000418644100035	Netherlands	University Of Amsterdam
WOS:000418824800052	UK	Newcastle University - Uk
WOS:000418824800052	UK	University Of Derby
WOS:000419982600007	Australia	Curtin University
WOS:000419982600007	US	National Geographic Society
WOS:000419982600007	US	University Of Hawaii
WOS:000423694200004	International	Global Coral Reef Alliance
WOS:000424825900003	France	Aix-marseille Universite
WOS:000424825900003	Spain	Consejo Superior De Investigaciones Cientificas (csic)
WOS:000424825900003	Spain	Csic - Centro Mediterraneo De Investigaciones Marinas Y Ambientales (cmima)
WOS:000424825900003	Spain	Csic - Instituto De Ciencias Del Mar (icm)
WOS:000424825900003	International	League Of European Research Universities - Leru
WOS:000424825900003	France	Udice-french Research Universities
WOS:000424825900003	Portugal	Universidade Do Porto
WOS:000424825900003	France	Universite De Toulon
WOS:000424825900003	Spain	University Of Barcelona
WOS:000424825900003	US	University Of Colorado Boulder
WOS:000424825900003	US	University Of Colorado System
WOS:000426523900006	US	Nova Southeastern University
WOS:000426775900013	Italy	Marche Polytechnic University
WOS:000426775900013	Italy	University Of Bologna
WOS:000426775900013	Italy	University Of Bologna
WOS:000426775900013	Italy	University Of Genoa
WOS:000426775900013	Croatia	University Of Split
WOS:000428970000002	India	Zoological Survey Of India
WOS:000428970000002	India	Zoological Survey Of India
WOS:000431489200020	Singapore	National University Of Singapore
WOS:000432018300011	Australia	Australian Institute Of Marine Science
WOS:000432018300011	US	Florida Institute Of Technology
WOS:000432018300011	US	Mote Marine Laboratory & Aquarium
WOS:000432018300011	US	United States Department Of The Interior
WOS:000432321600011	Virgin Islands	University Of The Virgin Islands
WOS:000435649100017	Spain	University Of Sevilla
WOS:000436215600044	China	Chia Nan University Of Pharmacy & Science
WOS:000436215600044	China	Hainan Normal University
WOS:000436215600044	China	Hainan University
WOS:000436215600044	China	Hainan University
WOS:000436215600044	China	Hainan University
WOS:000436484900001	US	National Oceanic Atmospheric Admin (noaa) - Usa
WOS:000436484900001	US	National Oceanic Atmospheric Admin (noaa) - Usa
WOS:000438220000005	US	Nova Southeastern University
WOS:000441110900004	US	University Of Hawaii
WOS:000441110900004	US	University Of Hawaii
WOS:000441331700019	Australia	Australian Institute Of Marine Science
WOS:000441331700019	Australia	James Cook University
WOS:000441331700019	Australia	James Cook University
WOS:000442664800012	Japan	Fisheries Research Agency - Japan
WOS:000442664800012	Japan	Fisheries Research Agency - Japan
WOS:000442664800012	Japan	Ministry Of Agriculture Forestry & Fisheries - Japan
WOS:000444614500062	France	Centre National De La Recherche Scientifique (cnrs)
WOS:000444614500062	France	Cirad
WOS:000444614500062	France	Ecole Pratique Des Hautes Etudes (ephe)
WOS:000444614500062	France	Institut Agro
WOS:000444614500062	France	Institut De Recherche Pour Le Developpement (ird)
WOS:000444614500062	France	Montpellier Supagro
WOS:000444614500062	France	Psl Research University Paris
WOS:000444614500062	France	Udice-french Research Universities
WOS:000444614500062	France	Universite De Montpellier
WOS:000444614500062	France	Universite Paul-valery
WOS:000446253500009	US	Mote Marine Laboratory & Aquarium
WOS:000446253500009	US	Mote Marine Laboratory & Aquarium
WOS:000446253500009	US	Mote Marine Laboratory & Aquarium
WOS:000447104100016	US	National Oceanic Atmospheric Admin (noaa) - Usa
WOS:000447104100016	US	University Of Hawaii
WOS:000447104100016	US	University Of Hawaii
WOS:000447104100016	US	University Of Hawaii
WOS:000447104100016	US	University Of Hawaii
WOS:000447296300032	US	California State University Northridge
WOS:000447296300032	US	California State University System
WOS:000447296300032	US	North Carolina State University
WOS:000447296300032	Japan	Okinawa Institute Of Science & Technology Graduate University
WOS:000447296300032	US	Smithsonian Institution
WOS:000447296300032	US	Smithsonian National Museum Of Natural History
WOS:000447296300032	US	Stanford University
WOS:000447296300032	US	State University System Of Florida
WOS:000447296300032	US	United States Department Of The Interior
WOS:000447296300032	US	United States Department Of The Interior
WOS:000447296300032	US	United States Geological Survey
WOS:000447296300032	US	United States Geological Survey
WOS:000447296300032	US	University Of California San Diego
WOS:000447296300032	US	University Of California System
WOS:000447296300032	US	University Of Hawaii
WOS:000447296300032	US	University Of North Carolina
WOS:000447296300032	Australia	University Of Queensland
WOS:000447296300032	Australia	University Of Queensland
WOS:000447296300032	US	University Of Rhode Island
WOS:000447296300032	US	University Of South Florida
WOS:000448109000039	US	George Mason University
WOS:000448109000039	US	Indiana University System
WOS:000448109000039	US	Indiana University-purdue University Indianapolis
WOS:000448109000039	Taiwan	National Dong Hwa University
WOS:000448109000039	Taiwan	National Museum Of Marine Biology & Aquarium
WOS:000448109000039	US	Smithsonian Institution
WOS:000448109000039	US	Smithsonian National Zoological Park & Conservation Biology Institute
WOS:000448109000039	US	University Of Minnesota System
WOS:000448109000039	US	University Of Minnesota System
WOS:000448109000039	US	University Of Minnesota Twin Cities
WOS:000448109000039	US	University Of Minnesota Twin Cities
WOS:000449164200008	Italy	Consiglio Nazionale Delle Ricerche (cnr)
WOS:000449164200008	Italy	Istituto Di Scienze Marine (ismar-cnr)
WOS:000449164200008	Italy	Marche Polytechnic University
WOS:000449164200008	Italy	University Of Bologna
WOS:000449164200008	Italy	University Of Bologna
WOS:000449164200008	UK	University Of Derby
WOS:000449490000012	US	State University System Of Florida
WOS:000449490000012	US	State University System Of Florida
WOS:000449490000012	US	University Of Florida
WOS:000449490000012	US	University Of Florida
WOS:000449709700014	Australia	Southern Cross University
WOS:000449709700027	Japan	Okinawa Institute Of Science & Technology Graduate University
WOS:000449709700027	Japan	University Of Tokyo
WOS:000451654100018	US	Florida Fish & Wildlife Conservation Commission
WOS:000451654100018	US	State University System Of Florida
WOS:000451654100018	US	State University System Of Florida
WOS:000451654100018	US	University Of Florida
WOS:000451654100018	US	University Of Florida
WOS:000454571700016	Brazil	Universidade De Passo Fundo
WOS:000454571700016	Brazil	Universidade De Passo Fundo
WOS:000454670300011	Australia	Australian National University
WOS:000454670300011	Philippines	University Of The Philippines
WOS:000454670300011	Philippines	University Of The Philippines
WOS:000455765300005	Japan	National Institute For Environmental Studies - Japan
WOS:000455765300005	Japan	University Of Tokyo
WOS:000455765300005	Japan	University Of Tokyo
WOS:000456638300004	Australia	Commonwealth Scientific & Industrial Research Organisation (csiro)
WOS:000456638300004	Australia	James Cook University
WOS:000456638300004	Australia	James Cook University
WOS:000456717800011	Spain	Universidad De Guadalajara
WOS:000456717800011	Mexico	Universidad Nacional Autonoma De Mexico
WOS:000457139000007	US	Florida Fish & Wildlife Conservation Commission
WOS:000457139000007	US	Georgia Southern University
WOS:000457139000007	US	Georgia Southern University
WOS:000457139000007	US	Nova Southeastern University
WOS:000457139000007	US	Skidaway Institute Of Oceanography
WOS:000457139000007	US	Skidaway Institute Of Oceanography
WOS:000457139000007	US	University Of Georgia
WOS:000457139000007	US	University Of Georgia
WOS:000457139000007	US	University System Of Georgia
WOS:000457139000007	US	University System Of Georgia
WOS:000457139000007	US	University System Of Georgia
WOS:000457139000007	US	University System Of Georgia
WOS:000457147000001	Australia	Australian Institute Of Marine Science
WOS:000457147000001	Australia	University Of Melbourne
WOS:000457147000001	Australia	University Of Melbourne
WOS:000457147000001	Australia	University Of Queensland
WOS:000457175200001	Australia	Australian Institute Of Marine Science
WOS:000457175200001	Australia	Australian Institute Of Marine Science
WOS:000457175200001	Australia	James Cook University
WOS:000457175200001	Australia	James Cook University
WOS:000457175200001	Australia	University Of Melbourne
WOS:000457358000135	Israel	Tel Aviv University
WOS:000457358000135	Israel	Tel Aviv University
WOS:000457690600372	Germany	Alfred Wegener Institute, Helmholtz Centre For Polar & Marine Research
WOS:000457690600372	US	Cary Institute Of Ecosystem Studies
WOS:000457690600372	Germany	Helmholtz Association
WOS:000457690600372	International	League Of European Research Universities - Leru
WOS:000457690600372	International	League Of European Research Universities - Leru
WOS:000457690600372	Germany	Leibniz Zentrum Fur Marine Tropenforschung (zmt)
WOS:000457690600372	Singapore	National University Of Singapore
WOS:000457690600372	Netherlands	Royal Netherlands Institute For Sea Research (nioz)
WOS:000457690600372	Netherlands	Utrecht University
WOS:000457690600372	Netherlands	Utrecht University
WOS:000457762000018	Philippines	Silliman University
WOS:000457762000018	Philippines	University Of Santo Tomas
WOS:000457762000018	Philippines	University Of Santo Tomas
WOS:000457828300001	Norway	Institute Of Marine Research - Norway
WOS:000457828300001	Norway	Norwegian Institute For Water Research (niva)
WOS:000457828300001	Norway	University Of Oslo
WOS:000458239300001	Canada	Carleton University
WOS:000458239300001	US	Florida Atlantic University
WOS:000458239300001	US	Florida International University
WOS:000458239300001	US	Harbor Branch Oceanographic Institute Foundation
WOS:000458239300001	US	State University System Of Florida
WOS:000458239300001	US	State University System Of Florida
WOS:000458239300021	US	Florida Atlantic University
WOS:000458239300021	US	Florida Institute Of Technology
WOS:000458239300021	US	Harbor Branch Oceanographic Institute Foundation
WOS:000458239300021	US	State University System Of Florida
WOS:000459857400031	Israel	Bar Ilan University
WOS:000459857400031	US	Loyola University Chicago
WOS:000459857400031	Germany	University Of Konstanz
WOS:000461602100011	US	Louisiana State University Shreveport
WOS:000461699300022	Japan	Fisheries Research Agency - Japan
WOS:000461699300022	Japan	Okinawa Institute Of Science & Technology Graduate University
WOS:000461817500003	Israel	Israel Oceanography and Limnological Research
WOS:000462018500014	Australia	James Cook University
WOS:000462018500014	Australia	James Cook University
WOS:000462018500014	Australia	University Of Adelaide
WOS:000462018500014	Australia	University Of Adelaide
WOS:000462018500014	US	University Of South Alabama
WOS:000462776800015	Australia	James Cook University
WOS:000462776800015	Australia	University Of Melbourne
WOS:000462776800015	Australia	University Of Sydney
WOS:000463695300007	US	Atlantic Oceanographic & Meteorological Laboratory (aoml)
WOS:000463695300007	US	George Mason University
WOS:000463695300007	US	National Oceanic Atmospheric Admin (noaa) - Usa
WOS:000463695300007	US	National Oceanic Atmospheric Admin (noaa) - Usa
WOS:000463695300007	US	University Of Miami
WOS:000464495700015	US	State University System Of Florida
WOS:000464495700015	US	State University System Of Florida
WOS:000464495700015	US	State University System Of Florida
WOS:000464495700015	US	University Of Florida
WOS:000464495700015	US	University Of Florida
WOS:000464495700015	US	University Of Florida
WOS:000464495700015	Australia	University Of Technology Sydney
WOS:000464952200010	Israel	Tel Aviv University
WOS:000464952200014	International	League Of European Research Universities - Leru
WOS:000464952200014	Netherlands	University Of Amsterdam
WOS:000465432900033	US	University Of California San Diego
WOS:000465432900033	US	University Of California San Diego
WOS:000465432900033	US	University Of California System
WOS:000465432900033	US	University Of California System
WOS:000465432900033	US	University Of North Carolina
WOS:000465432900033	US	University Of North Carolina
WOS:000465432900033	US	University Of San Diego
WOS:000465867500002	US	Loyola Marymount University
WOS:000465867500002	Spain	Universidade De Vigo
WOS:000465867500002	Portugal	Universidade Do Porto
WOS:000467689100017	Singapore	National University Of Singapore
WOS:000467689100017	Singapore	National University Of Singapore
WOS:000467689100017	Singapore	National University Of Singapore
WOS:000467981600006	US	California State University Northridge
WOS:000467981600006	US	California State University System
WOS:000467981600006	US	University Of Alaska Fairbanks
WOS:000467981600006	US	University Of Alaska System
WOS:000467981600006	US	University Of Rhode Island
WOS:000467981600006	US	University Of Rhode Island
WOS:000468332300025	Australia	James Cook University
WOS:000468332300025	US	State University System Of Florida
WOS:000468332300025	US	University Of Florida
WOS:000468332300025	Australia	University Of Technology Sydney
WOS:000470072200110	Israel	Ben Gurion University
WOS:000470072200110	Israel	Technion Israel Institute Of Technology
WOS:000472569200004	Australia	Southern Cross University
WOS:000472569200004	Philippines	University Of The Philippines
WOS:000472569200004	Philippines	University Of The Philippines
WOS:000472569200004	Philippines	University Of The Philippines
WOS:000472569200004	Philippines	University Of The Philippines
WOS:000474666300003	Thailand	Chulalongkorn University
WOS:000474666300003	Thailand	Prince Of Songkla University
WOS:000474808600020	US	National Geographic Society
WOS:000474808600020	Indonesia	Universitas Padjadjaran
WOS:000474808600020	International	Wildlife Conservation Society
WOS:000474808600020	International	World Wildlife Fund
WOS:000477748700003	US	Los Alamos National Laboratory
WOS:000477748700003	US	United States Department Of Energy (doe)
WOS:000477748700003	US	University Of California Los Angeles
WOS:000477748700003	US	University Of California System
WOS:000477748700003	US	University Of Maryland College Park
WOS:000477748700003	US	University Of Miami
WOS:000477748700003	US	University System Of Maryland
WOS:000478087900017	International	Nature Conservancy
WOS:000478087900017	US	U.S. Army Corps Of Engineers
WOS:000478087900017	US	United States Army
WOS:000478087900017	US	United States Department Of Defense
WOS:000478087900017	US	United States Department Of The Interior
WOS:000478087900017	US	United States Department Of The Interior
WOS:000478087900017	US	United States Department Of The Interior
WOS:000478087900017	US	Us Fish & Wildlife Service
WOS:000478087900017	US	Us Fish & Wildlife Service
WOS:000478087900017	US	Virginia Polytechnic Institute & State University
WOS:000478581900009	Israel	Israel Oceanogrphy & Limnological Research
WOS:000478867300009	Spain	Consejo Superior De Investigaciones Cientificas (csic)
WOS:000478867300009	Spain	Csic - Centro Mediterraneo De Investigaciones Marinas Y Ambientales (cmima)
WOS:000478867300009	Spain	Csic - Instituto De Ciencias Del Mar (icm)
WOS:000478867300009	International	League Of European Research Universities - Leru
WOS:000478867300009	Spain	Universitat De Girona
WOS:000478867300009	Spain	University Of Barcelona
WOS:000480376500017	Italy	Iuav University Venice
WOS:000480376500017	Italy	Universita Ca Foscari Venezia
WOS:000480632300096	Taiwan	Academia Sinica
WOS:000480632300096	Taiwan	Academia Sinica
WOS:000480632300096	Taiwan	National Sun Yat Sen University
WOS:000480632300096	Taiwan	National Taiwan University
WOS:000480632300096	Taiwan	National Taiwan University
WOS:000482977800001	US	Monterey Bay Aquarium Research Institute
WOS:000482977800001	US	National Oceanic Atmospheric Admin (noaa) - Usa
WOS:000483552900015	US	Icahn School Of Medicine At Mount Sinai
WOS:000483552900015	US	Stanford University
WOS:000483552900015	US	Stanford University
WOS:000483552900015	US	Stanford University
WOS:000483552900015	US	University Of Miami
WOS:000484052000013	Singapore	National University Of Singapore
WOS:000484052000013	Singapore	National University Of Singapore
WOS:000484052000013	Singapore	National University Of Singapore
WOS:000484997000030	US	Pennsylvania Commonwealth System Of Higher Education (pcshe)
WOS:000484997000030	US	Pennsylvania State University
WOS:000484997000030	US	University Of California Santa Barbara
WOS:000484997000030	US	University Of California Santa Barbara
WOS:000484997000030	US	University Of California System
WOS:000484997000030	US	University Of California System
WOS:000485310600010	Japan	Okinawa Institute Of Science & Technology Graduate University
WOS:000485310600010	Japan	Okinawa Institute Of Science & Technology Graduate University
WOS:000485310600010	Japan	Okinawa Institute Of Science & Technology Graduate University
WOS:000488121300001	US	National Oceanic Atmospheric Admin (noaa) - Usa
WOS:000488121300001	US	University Of Hawaii
WOS:000488121300001	US	University Of Hawaii
WOS:000489327300009	Australia	Australian Institute Of Marine Science
WOS:000489327300009	Australia	University Of Melbourne
WOS:000489866500004	Germany	Braunschweig University Of Technology
WOS:000489866500004	Mexico	Cinvestav - Centro De Investigacion Y De Estudios Avanzados Del Instituto Politecnico Nacional
WOS:000489866500004	Mexico	El Colegio De La Frontera Sur (ecosur)
WOS:000489866500004	Mexico	Universidad Nacional Autonoma De Mexico
WOS:000489866500004	Mexico	Universidad Nacional Autonoma De Mexico
WOS:000489866500004	Mexico	Universidad Nacional Autonoma De Mexico
WOS:000489866500004	Colombia	Universidad Nacional De Colombia
WOS:000489866500004	Brazil	Universidade De Sao Paulo
WOS:000492944700001	Australia	Commonwealth Scientific & Industrial Research Organisation (csiro)
WOS:000492944700001	Netherlands	Delft University Of Technology
WOS:000493344600001	Hong Kong	City University Of Hong Kong
WOS:000493344600001	US	University Of Connecticut
WOS:000493344600001	China	Xiamen University
WOS:000497279300001	Philippines	University Of The Philippines
WOS:000497279300001	Philippines	University Of The Philippines
WOS:000497727100001	US	State University System Of Florida
WOS:000497727100001	US	University Of Florida
WOS:000497837100001	Spain	Consejo Superior De Investigaciones Cientificas (csic)
WOS:000497837100001	Spain	Csic - Centro Mediterraneo De Investigaciones Marinas Y Ambientales (cmima)
WOS:000497837100001	Spain	Csic - Instituto De Ciencias Del Mar (icm)
WOS:000497837100001	International	League Of European Research Universities - Leru
WOS:000497837100001	Spain	University Of Barcelona
WOS:000498137400001	India	Indian Institute Of Technology System (iit System)
WOS:000498137400001	India	Indian Institute Of Technology System (iit System)
WOS:000498632800006	India	Zoological Survey Of India
WOS:000500468400001	Australia	Australian Institute Of Marine Science
WOS:000500468400001	Australia	James Cook University
WOS:000500468400001	Australia	James Cook University
WOS:000500468400001	UK	University Of Bristol
WOS:000500468400001	UK	University Of Exeter
WOS:000501387300015	India	Council Of Scientific & Industrial Research (csir) - India
WOS:000501387300015	Spain	Csir - National Institute Of Oceanography (nio)
WOS:000501387300015	India	Goa University
WOS:000501499100001	India	Indian Institute Of Technology System (iit System)
WOS:000501499100001	India	Jadavpur University
WOS:000502422300001	Canada	Memorial University Newfoundland
WOS:000502422300001	UK	Nerc National Oceanography Centre
WOS:000502422300001	Ireland	University College Dublin
WOS:000502422300001	UK	University Of Brighton
WOS:000502422300001	UK	University Of Southampton
WOS:000514114400017	US	Smithsonian Institution
WOS:000514114400017	US	Smithsonian National Zoological Park & Conservation Biology Institute
WOS:000514114400017	US	University Of Hawaii
WOS:000515327900014	UK	Manchester Metropolitan University
WOS:000515327900014	US	Old Dominion University
WOS:000515327900014	US	State University System Of Florida
WOS:000515327900014	US	State University System Of Florida
WOS:000515327900014	US	University Of Florida
WOS:000515327900014	US	University Of Florida
WOS:000515327900014	UK	University Of Liverpool
WOS:000517199600019	Australia	James Cook University
WOS:000517199600019	Philippines	University Of The Philippines
WOS:000517199600019	Philippines	University Of The Philippines
WOS:000519540200046	US	United States Department Of Agriculture (usda)
WOS:000519540200046	US	United States Department Of The Interior
WOS:000519540200046	US	United States Geological Survey
WOS:000519540200046	US	University Of California Davis
WOS:000519540200046	US	University Of California System
WOS:000519540200046	US	University Of Miami
WOS:000519962800001	Spain	Consejo Superior De Investigaciones Cientificas (csic)
WOS:000519962800001	Spain	Csic - Centro Mediterraneo De Investigaciones Marinas Y Ambientales (cmima)
WOS:000519962800001	Spain	Csic - Instituto De Ciencias Del Mar (icm)
WOS:000519962800001	International	League Of European Research Universities - Leru
WOS:000519962800001	International	League Of European Research Universities - Leru
WOS:000519962800001	Spain	Spanish Institute Of Oceanography
WOS:000519962800001	Spain	University Of Barcelona
WOS:000519962800001	UK	University Of Oxford
WOS:000519962800001	Italy	University Of Salento
WOS:000520527700001	Switzerland	Ecole Polytechnique Federale De Lausanne
WOS:000520527700001	International	League Of European Research Universities - Leru
WOS:000520527700001	France	Udice-french Research Universities
WOS:000520527700001	France	Universite De Versailles Saint-quentin-en-yvelines
WOS:000520527700001	France	Universite Paris Saclay
WOS:000522661400003	Israel	Ben Gurion University
WOS:000523229700001	US	Louisiana State University
WOS:000523229700001	US	Louisiana State University
WOS:000523229700001	US	Pennsylvania Commonwealth System Of Higher Education (pcshe)
WOS:000523229700001	US	Pennsylvania Commonwealth System Of Higher Education (pcshe)
WOS:000523229700001	US	Pennsylvania State University
WOS:000523229700001	Israel	Temple University
WOS:000526522100004	Mexico	Centro De Investigacion Cientifica De Yucatan
WOS:000526522100004	Mexico	Instituto Politecnico Nacional - Mexico
WOS:000526522100004	US	University Of Rhode Island
WOS:000527300300015	Australia	James Cook University
WOS:000527300300015	Australia	James Cook University
WOS:000527300300015	UK	University Of Exeter
WOS:000527300300015	Australia	University Of Queensland
WOS:000527300300015	Australia	University Of Queensland
WOS:000527300300015	Australia	University Of Queensland
WOS:000530806900001	US	National Oceanic Atmospheric Admin (noaa) - Usa
WOS:000530806900001	US	Nova Southeastern University
WOS:000530806900001	US	University Of Miami
WOS:000532527100001	Australia	Australian Institute Of Marine Science
WOS:000532527100001	Australia	James Cook University
WOS:000532610600019	International	Conservation International
WOS:000532610600019	Costa Rica	Universidad Costa Rica
WOS:000532610600019	Costa Rica	Universidad Costa Rica
WOS:000532610600019	Costa Rica	Universidad Costa Rica
WOS:000535433700007	Philippines	University Of The Philippines
WOS:000535433700007	Philippines	University Of The Philippines
WOS:000535525500001	Netherlands	Delft University Of Technology
WOS:000535525500001	Netherlands	Deltares
WOS:000535525500001	US	United States Department Of The Interior
WOS:000535525500001	US	United States Geological Survey
WOS:000537133200008	Antigua and Barbuda	Government of Antigua and Barbuda
WOS:000537338600001	Japan	Fisheries Research Agency - Japan
WOS:000537812400001	Japan	Fisheries Research Agency - Japan
WOS:000537812400001	Japan	Ministry Of Agriculture Forestry & Fisheries - Japan
WOS:000538684400006	China	Chinese Academy Of Sciences
WOS:000538684400006	China	Hainan University
WOS:000538684400006	China	South China Botanical Garden, Cas
WOS:000541741600012	US	Florida International University
WOS:000541741600012	US	State University System Of Florida
WOS:000550120900001	China	Chinese Academy Of Sciences
WOS:000550120900001	China	Guangxi University
WOS:000550120900001	China	Guangxi University
WOS:000550120900001	China	Institute Of Geographic Sciences & Natural Resources Research, Cas
WOS:000550285100001	US	Atlantic Oceanographic & Meteorological Laboratory (aoml)
WOS:000550285100001	US	National Oceanic Atmospheric Admin (noaa) - Usa
WOS:000550285100001	US	Oregon State University
WOS:000550285100001	US	State University System Of Florida
WOS:000550285100001	US	University Of South Florida
WOS:000550285100001	Faroe Island	University Of The Faroe Islands
WOS:000551318400001	South Africa	University Of Fort Hare
WOS:000551318400001	South Africa	University Of Fort Hare
WOS:000551318400001	Mauritius	University Of Mauritius
WOS:000551318400001	Mauritius	University Of Mauritius
WOS:000551318400001	South Africa	University Of South Africa
WOS:000551318400001	South Africa	University Of The Free State
WOS:000551751900001	US	Arizona State University
WOS:000551751900001	US	Arizona State University
WOS:000554334900002	Japan	Okinawa Institute Of Science & Technology Graduate University
WOS:000556411200018	Australia	Australian Institute Of Marine Science
WOS:000556411200018	Australia	Australian Institute Of Marine Science
WOS:000556411200018	US	Smithsonian Institution
WOS:000556411200018	US	Smithsonian National Zoological Park & Conservation Biology Institute
WOS:000556411200018	Australia	University Of Western Australia
WOS:000556872700021	US	National Oceanic Atmospheric Admin (noaa) - Usa
WOS:000556872700021	US	Pennsylvania Commonwealth System Of Higher Education (pcshe)
WOS:000556872700021	US	Pennsylvania Commonwealth System Of Higher Education (pcshe)
WOS:000556872700021	US	Pennsylvania Commonwealth System Of Higher Education (pcshe)
WOS:000556872700021	US	Pennsylvania State University
WOS:000556872700021	US	Pennsylvania State University
WOS:000556872700021	US	Pennsylvania State University
WOS:000556872700021	US	Pennsylvania State University
WOS:000556872700021	US	Pennsylvania State University
WOS:000556872700021	US	Pennsylvania State University
WOS:000556872700021	US	University Of North Carolina
WOS:000556872700021	US	University Of North Carolina
WOS:000560393300050	Mexico	Instituto Politecnico Nacional - Mexico
WOS:000560393300050	US	Smithsonian Institution
WOS:000560393300050	Mexico	Universidad Nacional Autonoma De Mexico
WOS:000560393300050	Puerto Rica	University Of Puerto Rico
WOS:000560393300050	Puerto Rica	University Of Puerto Rico
WOS:000560393300050	Puerto Rica	University Of Puerto Rico
WOS:000560393300050	Puerto Rica	University Of Puerto Rico
WOS:000560393300050	Australia	University Of Queensland
WOS:000560708200001	Saudi Arabia	King Abdullah University Of Science & Technology
WOS:000560708200001	Saudi Arabia	King Abdullah University Of Science & Technology
WOS:000562582100024	France	Centre National De La Recherche Scientifique (cnrs)
WOS:000562582100024	International	League Of European Research Universities - Leru
WOS:000562582100024	France	Sorbonne Universite
WOS:000562582100024	France	Udice-french Research Universities
WOS:000562582100024	Brazil	Universidade Federal Do Ceara
WOS:000562582100024	Italy	University Of Bologna
WOS:000562582100024	Italy	University Of Bologna
WOS:000562582100024	Italy	University Of Palermo
WOS:000562582100024	Italy	University Of Salento
WOS:000562625500001	US	State University System Of Florida
WOS:000562625500001	US	State University System Of Florida
WOS:000562625500001	US	University Of Florida
WOS:000562625500001	US	University Of Florida
WOS:000563621600001	US	National Academies Of Sciences, Engineering & Medicine
WOS:000563621600001	US	National Oceanic Atmospheric Admin (noaa) - Usa
WOS:000563621600001	US	National Oceanic Atmospheric Admin (noaa) - Usa
WOS:000564788300001	Japan	Tokyo Institute Of Technology
WOS:000564788300001	Brunei	University Brunei Darussalam
WOS:000564788300001	Japan	University Of Tokyo
WOS:000564788300001	Japan	Yakult Honsha Company, Limited
WOS:000568699400016	US	National Centers For Coastal Ocean Science (ncoos)
WOS:000568699400016	US	National Oceanic Atmospheric Admin (noaa) - Usa
WOS:000568699400016	US	National Oceanic Atmospheric Admin (noaa) - Usa
WOS:000568699400016	US	National Oceanic Atmospheric Admin (noaa) - Usa
WOS:000568699400016	US	Nova Southeastern University
WOS:000568699400016	US	Smithsonian Institution
WOS:000568699400016	US	Smithsonian National Museum Of Natural History
WOS:000568699400016	US	United States Environmental Protection Agency
WOS:000568699400016	US	United States Environmental Protection Agency
WOS:000568699400016	US	United States Environmental Protection Agency
WOS:000568699400016	US	United States Environmental Protection Agency
WOS:000568699400016	US	University Of Miami
WOS:000568699400016	Puerto Rica	University Of Puerto Rico
WOS:000568699400016	Puerto Rica	University Of Puerto Rico
WOS:000568699400016	Virgin Islands	University Of The Virgin Islands
WOS:000570896100002	Israel	University Of Haifa
WOS:000574775800010	US	Florida International University
WOS:000574775800010	US	State University System Of Florida
WOS:000574775800010	US	University Of Miami
WOS:000577180700021	Colombia	Universidad De Bogota Jorge Tadeo Lozano
WOS:000577180700021	Colombia	Universidad Del Magdalena
WOS:000577973600004	US	University Of Miami
WOS:000581970600021	US	Oak Ridge Institute For Science & Education
WOS:000581970600021	US	United States Department Of Agriculture (usda)
WOS:000581970600021	US	United States Department Of Agriculture (usda)
WOS:000581970600021	US	United States Department Of Agriculture (usda)
WOS:000581970600021	US	United States Department Of Energy (doe)
WOS:000581970600021	US	United States Forest Service
WOS:000581970600021	US	United States Forest Service
WOS:000581970600021	US	United States Forest Service
WOS:000582027000001	Spain	Universidad De Guadalajara
WOS:000582474500011	Norway	Norwegian Institute For Water Research (niva)
WOS:000582474500011	Ireland	Ollscoil Na Gaillimhe-university Of Galway
WOS:000582481200014	US	Florida International University
WOS:000582481200014	US	State University System Of Florida
WOS:000582481200014	US	State University System Of Florida
WOS:000582481200014	US	University Of Florida
WOS:000582481200014	US	University Of Miami
WOS:000582481200014	US	University Of Utah
WOS:000582481200014	US	Utah System Of Higher Education
WOS:000584517900001	US	Florida Fish & Wildlife Conservation Commission
WOS:000584517900001	US	Florida Fish & Wildlife Conservation Commission
WOS:000584517900001	US	Florida Institute Of Technology
WOS:000584517900001	US	Mote Marine Laboratory & Aquarium
WOS:000584517900001	US	Nova Southeastern University
WOS:000584517900001	Qatar	Qatar University
WOS:000584517900001	US	University Of Miami
WOS:000590180100001	US	University Of Miami
WOS:000595567500001	Costa Rica	Universidad Costa Rica
WOS:000595567500001	Costa Rica	Universidad Costa Rica
WOS:000595567500001	Costa Rica	Universidad Costa Rica
WOS:000595863100013	Australia	Southern Cross University
WOS:000595863100013	Philippines	University Of The Philippines
WOS:000595863100013	Philippines	University Of The Philippines
WOS:000596366500012	US	Monterey Bay Aquarium Research Institute
WOS:000596366500012	US	State University System Of Florida
WOS:000596366500012	US	University Of South Florida
WOS:000602182600001	Israel	Ben Gurion University
WOS:000603385800001	Australia	University Of Tasmania
WOS:000604758000008	China	Chinese Academy Of Sciences
WOS:000604758000008	China	Chinese Academy Of Sciences
WOS:000604758000008	China	Chinese Academy Of Sciences
WOS:000604758000008	China	Chinese Academy Of Sciences
WOS:000604758000008	China	Chinese Academy Of Sciences
WOS:000604758000008	China	South China Sea Institute Of Oceanology, Cas
WOS:000604758000008	China	South China Sea Institute Of Oceanology, Cas
WOS:000604758000008	China	University Of Chinese Academy Of Sciences, Cas
WOS:000612358500001	France	Centre National De La Recherche Scientifique (cnrs)
WOS:000612358500001	Spain	Consejo Superior De Investigaciones Cientificas (csic)
WOS:000612358500001	Spain	Csic - Instituto Mediterraneo De Estudios Avanzados (imedea)
WOS:000612358500001	Australia	Deakin University
WOS:000612358500001	Scottland	Edinburgh Napier University
WOS:000612358500001	Saudi Arabia	King Abdulaziz City For Science & Technology
WOS:000612358500001	Saudi Arabia	King Abdullah University Of Science & Technology
WOS:000612358500001	Saudi Arabia	King Abdullah University Of Science & Technology
WOS:000612358500001	Saudi Arabia	King Fahd University Of Petroleum & Minerals
WOS:000612358500001	International	League Of European Research Universities - Leru
WOS:000612358500001	International	Nature Conservancy
WOS:000612358500001	US	Pennsylvania Commonwealth System Of Higher Education (pcshe)
WOS:000612358500001	US	Pennsylvania State University
WOS:000612358500001	US	Pennsylvania State University
WOS:000612358500001	France	Sorbonne Universite
WOS:000612358500001	US	Stanford University
WOS:000612358500001	France	Udice-french Research Universities
WOS:000612358500001	UK	University Of Derby
WOS:000612358500001	UK	University Of Glasgow
WOS:000612358500001	US	University Of Miami
WOS:000612358500001	Australia	University Of Queensland
WOS:000612358500001	Australia	University Of Technology Sydney
WOS:000612358500001	Australia	University Of Western Australia
WOS:000616031200001	US	Michigan State University
WOS:000616031200001	US	University Of Hawaii
WOS:000616031200001	US	University Of Hawaii
WOS:000616031200001	US	University Of Miami
WOS:000616375300001	India	Anna University
WOS:000616375300001	India	Anna University
WOS:000621017300008	US	University Of Rhode Island
WOS:000621017300008	US	University Of Rhode Island
WOS:000621017300008	US	University Of Rhode Island
WOS:000621017300008	US	University Of Rhode Island
WOS:000621017300008	US	University Of Washington
WOS:000621017300008	US	University Of Washington
WOS:000621387100001	US	Arizona State University
WOS:000621387100001	US	Arizona State University
WOS:000624520200001	Australia	Australian Institute Of Marine Science
WOS:000624520200001	Australia	James Cook University
WOS:000624520200001	Australia	Southern Cross University
WOS:000624520200001	Australia	University Of Melbourne
WOS:000624644200001	Japan	Okinawa Environmental Research department
WOS:000630036100028	Australia	University Of Technology Sydney
WOS:000636407000001	Portugal	Universidade Do Porto
WOS:000636407000001	Portugal	Universidade Do Porto
WOS:000636407000001	Portugal	Universidade Do Porto
WOS:000636407000001	Portugal	Universidade Do Porto
WOS:000637057100001	Australia	James Cook University
WOS:000637057100001	Canada	Lancaster University
WOS:000637057100001	International	Nature Conservancy
WOS:000637057100001	France	Universite Paul-valery
WOS:000642485400001	US	Mote Marine Laboratory & Aquarium
WOS:000642485400001	US	University Of Southern California
WOS:000644259100001	US	National Oceanic Atmospheric Admin (noaa) - Usa
WOS:000644259100001	US	University Of Miami
WOS:000644259100001	US	University Of Miami
WOS:000644402000001	US	Mote Marine Laboratory & Aquarium
WOS:000644439200001	Finland	Abo Akademi University
WOS:000644439200001	US	Auburn University
WOS:000644439200001	US	Auburn University
WOS:000644439200001	US	California State University System
WOS:000644439200001	Australia	Central Queensland University
WOS:000644439200001	Canada	Dalhousie University
WOS:000644439200001	Australia	Deakin University
WOS:000644439200001	US	Duke University
WOS:000644439200001	US	Florida International University
WOS:000644439200001	Australia	Griffith University
WOS:000644439200001	France	Ifremer
WOS:000644439200001	France	Institut De Recherche Pour Le Developpement (ird)
WOS:000644439200001	France	Institut De Recherche Pour Le Developpement (ird)
WOS:000644439200001	International	League Of European Research Universities - Leru
WOS:000644439200001	US	Louisiana State University
WOS:000644439200001	US	Louisiana State University
WOS:000644439200001	Canada	Memorial University Newfoundland
WOS:000644439200001	US	National Center For Ecological Analysis & Synthesis
WOS:000644439200001	US	North Carolina State University
WOS:000644439200001	US	San Diego State University
WOS:000644439200001	Sweden	Sodertorn University
WOS:000644439200001	US	State University System Of Florida
WOS:000644439200001	US	State University System Of Florida
WOS:000644439200001	Sweden	Stockholm University
WOS:000644439200001	Sweden	Swedish University Of Agricultural Sciences
WOS:000644439200001	France	Universite De Montpellier
WOS:000644439200001	New Caledonia	Universite Nouvelle Caledonie
WOS:000644439200001	Australia	University Of Adelaide
WOS:000644439200001	Australia	University Of Adelaide
WOS:000644439200001	US	University Of Alaska Fairbanks
WOS:000644439200001	US	University Of Alaska System
WOS:000644439200001	US	University Of California Santa Barbara
WOS:000644439200001	US	University Of California Santa Barbara
WOS:000644439200001	US	University Of California System
WOS:000644439200001	US	University Of California System
WOS:000644439200001	US	University Of Florida
WOS:000644439200001	US	University Of Louisiana Lafayette
WOS:000644439200001	Australia	University Of New South Wales Sydney
WOS:000644439200001	US	University Of North Carolina
WOS:000644439200001	UK	University Of Oxford
WOS:000644439200001	Italy	University Of Salford
WOS:000644439200001	UK	University Of St Andrews
WOS:000644439200001	UK	University Of St Andrews
WOS:000644439200001	Australia	University Of The Sunshine Coast
WOS:000644439200001	US	University Of Washington
WOS:000644439200001	US	University Of Washington
WOS:000645098600003	Venezuela	Simon Bolivar University
WOS:000645098600003	US	Smithsonian Environmental Research Center
WOS:000645098600003	US	Smithsonian Institution
WOS:000645098600003	Spain	Universidade Da Coruna
WOS:000646400800002	Australia	James Cook University
WOS:000646400800002	Germany	Leibniz Zentrum Fur Marine Tropenforschung (zmt)
WOS:000646400800002	Germany	University Of Bremen
WOS:000647565400001	Mexico	Universidad Nacional Autonoma De Mexico
WOS:000650120300005	US	South Florida Water Management District
WOS:000650120300005	US	University Of Miami
WOS:000651362100003	US	State University System Of Florida
WOS:000651362100003	UK	University Of Derby
WOS:000651362100003	US	University Of Florida
WOS:000651374600001	US	Mote Marine Laboratory & Aquarium
WOS:000651374600001	US	Mote Marine Laboratory & Aquarium
WOS:000655626900020	Indonesia	Diponegoro University
WOS:000655626900020	Australia	Edith Cowan University
WOS:000655626900020	Indonesia	Indonesian Institute Of Sciences
WOS:000655626900020	Indonesia	Indonesian Institute Of Sciences
WOS:000655626900020	India	Ministry Of Environment & Forestry
WOS:000655626900020	Indonesia	Ministry Of Marine Affairs And Fisheries
WOS:000655626900020	Australia	Murdoch University
WOS:000655626900020	Indonesia	Universitas Hasanuddin
WOS:000655626900020	Indonesia	Universitas Udayana
WOS:000657714800001	Saudi Arabia	King Abdullah University Of Science & Technology
WOS:000657714800001	US	Oregon State University
WOS:000657714800001	Brazil	Universidade Federal Do Rio De Janeiro
WOS:000657714800001	Brazil	Universidade Federal Do Rio De Janeiro
WOS:000657714800001	Brazil	Universidade Federal Fluminense
WOS:000658391200074	US	State University System Of Florida
WOS:000658391200074	US	State University System Of Florida
WOS:000658391200074	US	University Of Florida
WOS:000658391200074	US	University Of Florida
WOS:000658395000001	US	University Of Hawaii
WOS:000658395000001	US	University Of Hawaii
WOS:000658930000001	UK	Newcastle University - Uk
WOS:000658930000001	UK	University Of Derby
WOS:000659355900005	US	Arizona State University
WOS:000659355900005	US	Florida A&m University
WOS:000659355900005	US	Florida State University
WOS:000659355900005	US	Florida State University
WOS:000659355900005	US	Louisiana State University
WOS:000659355900005	US	Louisiana State University
WOS:000659355900005	US	Louisiana State University
WOS:000659355900005	US	Louisiana State University
WOS:000659355900005	US	National Aeronautics & Space Administration (nasa)
WOS:000659355900005	US	National Oceanic Atmospheric Admin (noaa) - Usa
WOS:000659355900005	UK	Nerc National Oceanography Centre
WOS:000659355900005	Norway	Norwegian Meteorological Institute
WOS:000659355900005	US	Nova Southeastern University
WOS:000659355900005	Norway	Sintef
WOS:000659355900005	US	State University System Of Florida
WOS:000659355900005	US	State University System Of Florida
WOS:000659355900005	US	State University System Of Florida
WOS:000659355900005	US	State University System Of Florida
WOS:000659355900005	US	Texas A&m University College Station
WOS:000659355900005	US	Texas A&m University System
WOS:000659355900005	US	University Of Miami
WOS:000659355900005	US	University Of Miami
WOS:000659355900005	US	University Of South Florida
WOS:000659355900005	UK	University Of Southampton
WOS:000659433500005	US	University Of Hawaii
WOS:000659433500005	US	University Of Hawaii
WOS:000659433500005	US	University Of Hawaii
WOS:000659433500005	US	University Of Hawaii
WOS:000659433500005	US	University Of Pennsylvania
WOS:000659433500005	US	University Of Rhode Island
WOS:000661594400001	UK	University Of Exeter
WOS:000661594400001	Australia	University Of Queensland
WOS:000661594400001	Australia	University Of Queensland
WOS:000663329400001	US	National Oceanic Atmospheric Admin (noaa) - Usa
WOS:000663329400001	US	State University System Of Florida
WOS:000663329400001	US	State University System Of Florida
WOS:000663329400001	US	State University System Of Florida
WOS:000663329400001	US	State University System Of Florida
WOS:000663329400001	US	University Of Florida
WOS:000663329400001	US	University Of Florida
WOS:000663329400001	US	University Of Florida
WOS:000663329400001	US	University Of Florida
WOS:000663945300001	Japan	Okinawa Institute Of Science & Technology Graduate University
WOS:000663945300001	Japan	Okinawa Institute Of Science & Technology Graduate University
WOS:000663945300001	Japan	University Of Tokyo
WOS:000664180500001	France	Aix-marseille Universite
WOS:000664180500001	Spain	Autonomous University Of Barcelona
WOS:000664180500001	France	Centre National De La Recherche Scientifique (cnrs)
WOS:000664180500001	France	Centre National De La Recherche Scientifique (cnrs)
WOS:000664180500001	Spain	Consejo Superior De Investigaciones Cientificas (csic)
WOS:000664180500001	Spain	Csic - Centro Mediterraneo De Investigaciones Marinas Y Ambientales (cmima)
WOS:000664180500001	Spain	Csic - Instituto De Ciencias Del Mar (icm)
WOS:000664180500001	France	Ecole Pratique Des Hautes Etudes (ephe)
WOS:000664180500001	France	Institut De Recherche Pour Le Developpement (ird)
WOS:000664180500001	International	League Of European Research Universities - Leru
WOS:000664180500001	International	League Of European Research Universities - Leru
WOS:000664180500001	France	Museum National D'histoire Naturelle (mnhn)
WOS:000664180500001	France	Psl Research University Paris
WOS:000664180500001	France	Sorbonne Universite
WOS:000664180500001	France	Udice-french Research Universities
WOS:000664180500001	France	Udice-french Research Universities
WOS:000664180500001	Portugal	Universidade Do Porto
WOS:000664180500001	Portugal	Universidade Do Porto
WOS:000664180500001	France	Universite De Paris
WOS:000664180500001	France	Universite De Toulon
WOS:000664180500001	Spain	University Of Barcelona
WOS:000668132400001	Mexico	Instituto Politecnico Nacional - Mexico
WOS:000671692800017	US	United States Environmental Protection Agency
WOS:000671692800017	US	United States Environmental Protection Agency
WOS:000673382600002	US	State University System Of Florida
WOS:000673382600002	US	State University System Of Florida
WOS:000673382600002	US	University Of Florida
WOS:000673382600002	US	University Of Florida
WOS:000677503800005	Spain	Consejo Superior De Investigaciones Cientificas (csic)
WOS:000677503800005	Spain	Csic - Instituto De Ciencia De Materiales De Barcelona (icmab)
WOS:000677503800005	Brazil	Universidade Estadual De Campinas
WOS:000681108600006	Australia	Australian Institute Of Marine Science
WOS:000681108600006	Australia	Commonwealth Scientific & Industrial Research Organisation (csiro)
WOS:000681108600006	Australia	Southern Cross University
WOS:000683287600001	Venezuela	Simon Bolivar University
WOS:000683287600001	Mexico	Universidad Autonoma Metropolitana - Mexico
WOS:000683306500001	US	Arizona State University
WOS:000683306500001	US	Arizona State University
WOS:000683306500001	US	University Of Southern Mississippi
WOS:000685114900010	Australia	Australian Institute Of Marine Science
WOS:000685114900010	Australia	Australian Institute Of Marine Science
WOS:000685114900010	Australia	James Cook University
WOS:000685114900010	Australia	James Cook University
WOS:000685114900010	Australia	University Of Western Australia
WOS:000690244500001	Australia	Australian Institute Of Marine Science
WOS:000690244500001	Australia	Monash University
WOS:000692563700001	US	Nova Southeastern University
WOS:000692563700001	US	University Of North Carolina
WOS:000692563700001	US	University Of North Carolina
WOS:000694040000001	Mexico	Universidad Nacional Autonoma De Mexico
WOS:000695949500006	India	Indian Institute Of Technology System (iit System)
WOS:000695949500006	India	Indian Institute Of Technology System (iit System)
WOS:000695949500006	India	Indian Institute Of Technology System (iit System)
WOS:000695949500006	India	Jadavpur University
WOS:000695949500006	India	Jadavpur University
WOS:000696783400001	US	United States Department Of The Interior
WOS:000696783400001	US	United States Geological Survey
WOS:000696783400001	US	University Of Delaware
WOS:000696783400001	US	Virginia Institute Of Marine Science
WOS:000696783400001	US	William & Mary
WOS:000697681600008	Australia	Deakin University
WOS:000697681600008	Australia	James Cook University
WOS:000697681600008	Australia	University Of Queensland
WOS:000697681600008	Australia	University Of Queensland
WOS:000697681600008	Australia	University Of Queensland
WOS:000697681600008	Australia	University Of Queensland
WOS:000698962900026	US	State University System Of Florida
WOS:000698962900026	US	State University System Of Florida
WOS:000698962900026	US	University Of Florida
WOS:000698962900026	US	University Of Florida
WOS:000699846000018	Saudi Arabia	King Abdullah University Of Science & Technology
WOS:000699846000018	Saudi Arabia	King Abdullah University Of Science & Technology
WOS:000699846000018	Saudi Arabia	King Abdullah University Of Science & Technology
WOS:000699846000018	Saudi Arabia	King Abdullah University Of Science & Technology
WOS:000700001700002	Saudi Arabia	King Fahd University Of Petroleum & Minerals
WOS:000700001700002	Portugal	Universidade Do Algarve
WOS:000700770700002	China	Beijing Normal University
WOS:000700770700002	China	Chinese Research Academy Of Environmental Sciences
WOS:000700770700002	China	Guangdong University Of Technology
WOS:000700770700002	Italy	Parthenope University Naples
WOS:000700770700002	Italy	University Of Florence
WOS:000700953600001	US	Stanford University
WOS:000701742400009	Australia	Australian Institute Of Marine Science
WOS:000701742400009	Australia	Australian Institute Of Marine Science
WOS:000701742400009	Spain	Consejo Superior De Investigaciones Cientificas (csic)
WOS:000701742400009	Australia	University Of Queensland
WOS:000701742400009	Australia	University Of Queensland
WOS:000701743500009	Australia	Australian National University
WOS:000702151600003	International	League Of European Research Universities - Leru
WOS:000702151600003	US	Mote Marine Laboratory & Aquarium
WOS:000702151600003	US	National Oceanic Atmospheric Admin (noaa) - Usa
WOS:000702151600003	US	National Oceanic Atmospheric Admin (noaa) - Usa
WOS:000702151600003	US	National Oceanic Atmospheric Admin (noaa) - Usa
WOS:000702151600003	US	Pennsylvania Commonwealth System Of Higher Education (pcshe)
WOS:000702151600003	US	Pennsylvania State University
WOS:000702151600003	US	Pennsylvania State University
WOS:000702151600003	Netherlands	Radboud University Nijmegen
WOS:000702151600003	US	Smithsonian Institution
WOS:000702151600003	US	Smithsonian National Zoological Park & Conservation Biology Institute
WOS:000702151600003	US	State University System Of Florida
WOS:000702151600003	US	United States Department Of Agriculture (usda)
WOS:000702151600003	Netherlands	University Of Amsterdam
WOS:000702151600003	Germany	University Of Bremen
WOS:000702151600003	US	University Of Florida
WOS:000703199600001	Spain	Consejo Superior De Investigaciones Cientificas (csic)
WOS:000703199600001	Spain	Csic - Centro Mediterraneo De Investigaciones Marinas Y Ambientales (cmima)
WOS:000703199600001	Spain	Csic - Instituto De Ciencias Del Mar (icm)
WOS:000703199600001	International	League Of European Research Universities - Leru
WOS:000703199600001	Spain	Universitat De Girona
WOS:000703199600001	Spain	University Of Barcelona
WOS:000703703700009	Australia	Australian Institute Of Marine Science
WOS:000703703700009	Australia	Commonwealth Scientific & Industrial Research Organisation (csiro)
WOS:000703703700009	Australia	University Of Tasmania
WOS:000704787200001	Australia	Australian Institute Of Marine Science
WOS:000706213700001	Mexico	Instituto Politecnico Nacional - Mexico
WOS:000707639700040	US	University Of Wisconsin
WOS:000707639700040	US	University Of Wisconsin
WOS:000709222300002	Belgium	Universite Libre De Bruxelles
WOS:000709222300002	Belgium	University Of Liege
WOS:000709222300002	Belgium	University Of Mons
WOS:000709222300002	Belgium	Vrije Universiteit Brussel
WOS:000711815600001	International	League Of European Research Universities - Leru
WOS:000711815600001	Canada	University Of Alberta
WOS:000711815600001	UK	University Of Oxford
WOS:000711873300012	China	Beibu Gulf University
WOS:000711873300012	China	Chinese Academy Of Sciences
WOS:000711873300012	China	Liaoning Normal University
WOS:000711873300012	China	South China Sea Institute Of Oceanology, Cas
WOS:000716620500001	Germany	Alfred Wegener Institute, Helmholtz Centre For Polar & Marine Research
WOS:000716620500001	Germany	Geomar Helmholtz Center For Ocean Research Kiel
WOS:000716620500001	Belgium	Ghent University
WOS:000716620500001	Germany	Helmholtz Association
WOS:000716620500001	Germany	Helmholtz Association
WOS:000716620500001	International	League Of European Research Universities - Leru
WOS:000716620500001	International	League Of European Research Universities - Leru
WOS:000716620500001	Netherlands	Royal Netherlands Institute For Sea Research (nioz)
WOS:000716620500001	Netherlands	Utrecht University
WOS:000716620500001	Netherlands	Utrecht University
WOS:000719332100001	Australia	Australian Institute Of Marine Science
WOS:000719332100001	Australia	University Of Queensland
WOS:000719332100001	Australia	University Of Queensland
WOS:000719332100001	Australia	University Of Queensland
WOS:000722613800001	Italy	University Of Milano-bicocca
WOS:000727788800001	US	Mars
WOS:000727788800001	Indonesia	Universitas Hasanuddin
WOS:000727788800001	Indonesia	Universitas Hasanuddin
WOS:000727788800001	UK	University College London
WOS:000727788800001	UK	University Of Bristol
WOS:000727788800001	UK	University Of Essex
WOS:000727788800001	UK	University Of Exeter
WOS:000727788800001	UK	University Of London
WOS:000727788800001	US	University Of West Scotland
WOS:000730188900001	Australia	Southern Cross University
WOS:000730188900001	Philippines	University Of The Philippines
WOS:000730188900001	Philippines	University Of The Philippines
WOS:000737772000001	Singapore	National University Of Singapore
WOS:000737772000001	Singapore	National University Of Singapore
WOS:000737772000001	Singapore	National University Of Singapore
WOS:000741284500001	China	Chinese Academy Of Sciences
WOS:000741284500001	China	Chinese Academy Of Sciences
WOS:000741284500001	China	Chinese Academy Of Sciences
WOS:000741284500001	China	Chinese Academy Of Sciences
WOS:000741284500001	China	South China Sea Institute Of Oceanology, Cas
WOS:000741284500001	China	University Of Chinese Academy Of Sciences, Cas
WOS:000741284500001	China	Yantai University
WOS:000744247600003	Iran	Shahid Beheshti University Medical Sciences
WOS:000744247600003	Iran	Tarbiat Modares University
WOS:000746806800002	US	State University System Of Florida
WOS:000746806800002	US	State University System Of Florida
WOS:000746806800002	US	University Of South Florida
WOS:000746806800002	US	University Of South Florida
WOS:000747624700017	Canada	Fisheries & Oceans Canada
WOS:000747624700017	Vietnam	Nha Trang University
WOS:000752185400001	Australia	Australian Institute Of Marine Science
WOS:000752185400001	Australia	Macquarie University
WOS:000752185400001	Australia	University Of Melbourne
WOS:000757161100007	US	University Of Rhode Island
WOS:000761282000009	US	National Oceanic Atmospheric Admin (noaa) - Usa
WOS:000761282000009	US	National Oceanic Atmospheric Admin (noaa) - Usa
WOS:000761282000009	US	Nova Southeastern University
WOS:000761282000009	US	Smithsonian Institution
WOS:000761282000009	US	Smithsonian National Museum Of Natural History
WOS:000761282000009	US	United States Department Of The Interior
WOS:000761282000009	US	United States Environmental Protection Agency
WOS:000761282000009	US	United States Environmental Protection Agency
WOS:000761282000009	US	United States Environmental Protection Agency
WOS:000761282000009	US	United States Geological Survey
WOS:000761282000009	US	University Of North Carolina
WOS:000761282000009	US	University Of North Carolina
WOS:000761282000009	Puerto Rica	University Of Puerto Rico
WOS:000761282000009	Puerto Rica	University Of Puerto Rico
WOS:000761282000009	Puerto Rica	University Of Puerto Rico
WOS:000761282000009	Puerto Rica	University Of Puerto Rico
WOS:000762125900001	France	Centre National De La Recherche Scientifique (cnrs)
WOS:000762125900001	France	Centre National De La Recherche Scientifique (cnrs)
WOS:000762125900001	France	Cnrs - Institute Of Ecology & Environment (inee)
WOS:000762125900001	France	Cnrs - Institute Of Ecology & Environment (inee)
WOS:000762125900001	France	Universite Perpignan Via Domitia
WOS:000766803900005	Italy	University Of Milano-bicocca
WOS:000770661800001	US	California State Polytechnic University Pomona
WOS:000770661800001	US	California State University System
WOS:000770661800001	US	California State University System
WOS:000770661800001	US	San Diego State University
WOS:000770661800001	US	University Of California Davis
WOS:000770661800001	US	University Of California System
WOS:000776008000024	Australia	Australian Institute Of Marine Science
WOS:000776008000024	Australia	University Of Melbourne
WOS:000776502200001	US	National Oceanic Atmospheric Admin (noaa) - Usa
WOS:000777565600001	US	Smithsonian Institution
WOS:000777565600001	US	Smithsonian National Zoological Park & Conservation Biology Institute
WOS:000777565600001	US	University Of Hawaii
WOS:000777565600001	US	University Of Hawaii
WOS:000781290700001	Belgium	Ghent University
WOS:000781290700001	Italy	Marche Polytechnic University
WOS:000781290700001	Italy	Stazione Zoologica Anton Dohrn Di Napoli
WOS:000781913800001	US	Arkansas Tech University
WOS:000781913800001	US	Florida International University
WOS:000781913800001	US	Florida International University
WOS:000781913800001	US	State University System Of Florida
WOS:000781913800001	US	State University System Of Florida
WOS:000781913800001	US	University Of Miami
WOS:000784248900002	Australia	James Cook University
WOS:000784248900002	Australia	James Cook University
WOS:000784248900002	Australia	Queensland University Of Technology (qut)
WOS:000784248900002	Australia	Queensland University Of Technology (qut)
WOS:000784248900002	Australia	Queensland University Of Technology (qut)
WOS:000788144600002	International	League Of European Research Universities - Leru
WOS:000788144600002	Netherlands	Royal Netherlands Institute For Sea Research (nioz)
WOS:000788144600002	Netherlands	Utrecht University
WOS:000788144600002	Netherlands	Wageningen University & Research
WOS:000788144600002	Netherlands	Wageningen University & Research
WOS:000788144600002	Netherlands	Wageningen University & Research
WOS:000788498500004	US	Mote Marine Laboratory & Aquarium
WOS:000788498500004	US	Smith College
WOS:000788498500004	US	University Of Texas Austin
WOS:000788498500004	US	University Of Texas System
WOS:000791671000001	Colombia	Universidad Del Magdalena
WOS:000791671000001	Colombia	Universidad Nacional De Colombia
WOS:000792779100001	US	Marine Biological Laboratory - Woods Hole
WOS:000792779100001	US	National Oceanic Atmospheric Admin (noaa) - Usa
WOS:000792779100001	US	National Oceanic Atmospheric Admin (noaa) - Usa
WOS:000792779100001	US	Nova Southeastern University
WOS:000792779100001	US	Smithsonian Institution
WOS:000792779100001	US	Smithsonian National Museum Of Natural History
WOS:000792779100001	US	United States Department Of The Interior
WOS:000792779100001	US	United States Environmental Protection Agency
WOS:000792779100001	US	United States Environmental Protection Agency
WOS:000792779100001	US	United States Environmental Protection Agency
WOS:000792779100001	US	United States Environmental Protection Agency
WOS:000792779100001	US	United States Environmental Protection Agency
WOS:000792779100001	US	United States Geological Survey
WOS:000792779100001	US	University Of North Carolina
WOS:000792779100001	US	University Of North Carolina
WOS:000792779100001	Puerto Rica	University Of Puerto Rico
WOS:000792779100001	Puerto Rica	University Of Puerto Rico
WOS:000792779100001	Puerto Rica	University Of Puerto Rico
WOS:000792779100001	Puerto Rica	University Of Puerto Rico
WOS:000792779100001	Virgin Islands	University Of The Virgin Islands
WOS:000793042100002	US	Smithsonian Institution
WOS:000793042100002	US	Smithsonian Institution
WOS:000793042100002	US	Smithsonian National Museum Of Natural History
WOS:000793042100002	US	Smithsonian National Zoological Park & Conservation Biology Institute
WOS:000793736800005	Australia	Commonwealth Scientific & Industrial Research Organisation (csiro)
WOS:000793736800005	Australia	Griffith University
WOS:000793736800005	UK	University Of Surrey
WOS:000794872600004	Israel	Bar Ilan University
WOS:000794872600004	Israel	Technion Israel Institute Of Technology
WOS:000794872600004	Israel	Tel Aviv University
WOS:000794872600004	Israel	University Of Haifa
WOS:000794872600004	Israel	University Of Haifa
WOS:000795140000007	Israel	Technion Israel Institute Of Technology
WOS:000797559900001	Australia	James Cook University
WOS:000797559900001	US	Mars
WOS:000797559900001	US	Mote Marine Laboratory & Aquarium
WOS:000797559900001	International	Nature Conservancy
WOS:000797559900001	US	Stanford University
WOS:000797559900001	Mexico	Universidad Nacional Autonoma De Mexico
WOS:000797559900001	Australia	University Of Queensland
WOS:000802084200003	India	Council Of Scientific & Industrial Research (csir) - India
WOS:000802084200003	India	Council Of Scientific & Industrial Research (csir) - India
WOS:000802084200003	Spain	Csir - National Institute Of Oceanography (nio)
WOS:000802084200003	Spain	Csir - National Institute Of Oceanography (nio)
WOS:000804777000001	Canada	Lakehead University
WOS:000804777000001	China	Nanjing Forestry University
WOS:000804777000001	US	University Of Miami
WOS:A1991FM32500010	NA	NA
WOS:A1994QB58400030	US	University Of Miami
WOS:A1995RR27600009	US	University Of Missouri
WOS:A1995RR27600009	US	University Of Missouri
WOS:A1995RR27600009	US	University Of Missouri
WOS:A1995RR27600009	US	University Of Missouri
WOS:A1995RR27600009	US	University Of North Carolina
WOS:A1995RR27600009	US	University Of North Carolina Chapel Hill
WOS:A1995RR27600009	US	University Of North Carolina School Of Medicine
WOS:A1996UU94700004	Australia	Great Barrier Reef Aquarium
